# Supplementary material
Source: publisher figshare collection journal article supplement (https://gsajournals.figshare.com/ndownloader/files/11285546)
Supplement: Supplementary file 1 [file 11285546]

## Sheet: 1163CompsInAll3Table.txt
Table S4. List of all 1163 differentially expressed genes found by all three statistical packages with annotation and statistical support from DESeq included.
				DESeq
Gene name	Annotation	Arabidopsis Accession	E-value	baseMean	baseMeanA	baseMean B	log2Fold Change	pval	padj	logFC.abs	lncRNA
comp100069	Component of the translocon outer membrane (TOC) complex. Forms the outer envelope translocation channel (beta-barrel). Plays a role in preprotein conductance. Imported into chloroplast. Expressed in young dividing photosynthetic tissues. Knockout mutants are embryo lethal with arrested development at the two-cell stage. Knockout mutants have abnormal etioplasts.	AT3G46740.1	0	5414.07	3181.09	7647.04	1.26538	9.51035e-06	0.000974752	1.26538
comp100079	plasma membrane-bound hybrid histidine kinase and cytokinin sensor that is expressed within the female gametophyte.	AT2G47430.1	2e-119	658.779	363.39	954.168	1.39272	6.77514e-06	0.000725748	1.39272
comp100145	unknown protein; FUNCTIONS IN: molecular_function unknown; INVOLVED IN: biological_process unknown; LOCATED IN: thylakoid, chloroplast; EXPRESSED IN: 22 plant structures; EXPRESSED DURING: 14 growth stages; CONTAINS InterPro DOMAIN/s: Protein of unknown function DUF2488 (InterPro:IPR019616); Has 1807 Blast hits to 1807 proteins in 277 species: Archae - 0; Bacteria - 0; Metazoa - 736; Fungi - 347;…	AT5G58250.1	2e-59	233.484	373.499	93.4698	-1.99853	3.79212e-11	2.15984e-08	1.99853
comp100239	unknown protein;LOCATED IN: vacuole; EXPRESSED IN: 24 plant structures; EXPRESSED DURING: 13 growth stages; BEST Arabidopsis thaliana protein match is: glycine-rich protein (TAIR:AT4G32920.3); Has 1807 Blast hits to 1807 proteins in 277 species: Archae - 0; Bacteria - 0; Metazoa - 736; Fungi - 347; Plants - 385; Viruses - 0; Other Eukaryotes - 339 (source: NCBI BLink).	AT5G11700.1	0	1456.26	512.229	2400.28	2.22834	9.09325e-14	1.02748e-10	2.22834
comp100243	binding;calmodulin binding; FUNCTIONS IN: calmodulin binding, binding; LOCATED IN: chloroplast; EXPRESSED IN: 13 plant structures; EXPRESSED DURING: 6 growth stages; CONTAINS InterPro DOMAIN/s: Calponin-homology (InterPro:IPR016146), Armadillo (InterPro:IPR000225), Calponin-like actin-binding (InterPro:IPR001715), Armadillo-type fold (InterPro:IPR016024), IQ calmodulin-binding region (InterPro:IP…	AT4G21820.1	6e-77	2845.88	1460.55	4231.21	1.53456	1.99184e-07	4.03296e-05	1.53456
comp100289				39.7892	14.0513	65.5271	2.22139	5.40264e-06	0.000607524	2.22139
comp100307	Di-glucose binding protein with Kinesin motor domain; FUNCTIONS IN: microtubule motor activity, ATP binding; INVOLVED IN: microtubule-based movement; EXPRESSED IN: 18 plant structures; EXPRESSED DURING: 7 growth stages; CONTAINS InterPro DOMAIN/s: Kinesin, motor region, conserved site (InterPro:IPR019821), Malectin/receptor-like protein kinase (InterPro:IPR021720), Kinesin, motor domain (InterPro…	AT1G72250.1	2e-160	1662.84	1041.16	2284.53	1.13371	0.000154551	0.00929375	1.13371
comp100365	Homologous to the maize transcription factor Viviparous-1. Full length ABI3 protein binds to the highly conserved RY motif [DNA motif CATGCA(TG)], present in many seed-specific promoters, and the B3 domains of this transcription factor is necessary for the specific interaction with the RY element. Transcriptional activity of ABI3 requires the B3 DNA-binding domain and an activation domain. In add…	AT3G24650.1	2e-40	1332.16	750.079	1914.24	1.35166	1.23272e-06	0.000180668	1.35166
comp100424	formin14. Interacts with microtubules and microfilaments to regulate cell division.	AT1G31810.1	1e-176	382.886	74.2311	691.54	3.21972	2.294e-23	1.60709e-19	3.21972
comp100430				588.881	302.139	875.623	1.5351	7.33934e-07	0.000116856	1.5351	lncRNA
comp100473				1799.81	1077.29	2522.33	1.22736	4.13455e-05	0.00324356	1.22736
comp100509	unknown protein; INVOLVED IN: biological_process unknown; EXPRESSED IN: 23 plant structures; EXPRESSED DURING: 13 growth stages; Has 28929 Blast hits to 19542 proteins in 1425 species: Archae - 211; Bacteria - 3079; Metazoa - 14558; Fungi - 2157; Plants - 966; Viruses - 80; Other Eukaryotes - 7878 (source: NCBI BLink).	AT5G53620.3	5e-48	2327.09	1406.24	3247.94	1.20768	3.08065e-05	0.00256926	1.20768
comp100510	Responsible for the synthesis of callose deposited at the primary cell wall of meiocytes, tetrads and microspores. Required for exine formation during microgametogenesis and for pollen viability. Highest expression in meiocytes, tetrads, microspores and mature pollen.	AT2G13680.1	0	2155.03	998.36	3311.69	1.72994	1.01546e-08	3.0272e-06	1.72994
comp100517	global transcription factor group A2 (GTA2); FUNCTIONS IN: transcription elongation regulator activity, structural constituent of ribosome, sequence-specific DNA binding transcription factor activity; INVOLVED IN: translation, regulation of transcription from RNA polymerase II promoter, positive regulation of RNA elongation from RNA polymerase II promoter; LOCATED IN: ribosome, intracellular; EXP…	AT4G08350.1	0	2606.61	1299.24	3913.98	1.59097	5.42846e-08	1.26344e-05	1.59097
comp100524	ARM repeat superfamily protein; FUNCTIONS IN: protein transporter activity, binding; INVOLVED IN: intracellular protein transport, protein import into nucleus, docking; LOCATED IN: nucleus, nuclear pore, cytoplasm; EXPRESSED IN: 22 plant structures; EXPRESSED DURING: 13 growth stages; CONTAINS InterPro DOMAIN/s: Importin-beta, N-terminal (InterPro:IPR001494), Armadillo-type fold (InterPro:IPR0160…	AT5G06120.2	0	2083.95	1235.52	2932.39	1.24696	2.65604e-05	0.00226365	1.24696
comp100535	alpha-glucan phosphorylase. In vitro, the enzyme has a preference for branched polysaccharides, such as glycogen.	AT3G46970.1	7e-16	2221.35	1392.01	3050.7	1.13197	4.86424e-05	0.00369688	1.13197
comp100728	cleavage stimulation factor 77, a polyadenylation factor subunit. RNA 3&#8242;-end?processing factor of antisense FLC transcript. Mediates silencing of the floral repressor gene FLC.	AT1G17760.1	0	1347.77	802.863	1892.68	1.2372	5.11229e-05	0.00383993	1.2372
comp100748	Enhancer of polycomb-like transcription factor protein; FUNCTIONS IN: nucleic acid binding; INVOLVED IN: biological_process unknown; LOCATED IN: cellular_component unknown; EXPRESSED IN: 25 plant structures; EXPRESSED DURING: 14 growth stages; CONTAINS InterPro DOMAIN/s: Tudor domain (InterPro:IPR002999), Enhancer of polycomb-like (InterPro:IPR019542); BEST Arabidopsis thaliana protein match is: …	AT4G32620.1	1e-38	988.293	566.012	1410.58	1.31738	1.53388e-05	0.00142328	1.31738
comp100777	nucleic acid binding;zinc ion binding;DNA binding; FUNCTIONS IN: DNA binding, zinc ion binding, nucleic acid binding; INVOLVED IN: histone modification, transcription initiation; LOCATED IN: nucleus; EXPRESSED IN: guard cell, cultured cell; CONTAINS InterPro DOMAIN/s: Zinc finger, CCCH-type (InterPro:IPR000571), Zinc finger, PHD-type, conserved site (InterPro:IPR019786), Plus-3 domain, subgroup (…	AT2G16485.1	1e-73	679.438	363.579	995.297	1.45286	1.52594e-06	0.000216399	1.45286
comp100781	DNA-binding bromodomain-containing protein; FUNCTIONS IN: DNA binding; INVOLVED IN: biological_process unknown; LOCATED IN: mitochondrion; EXPRESSED IN: 23 plant structures; EXPRESSED DURING: 13 growth stages; CONTAINS InterPro DOMAIN/s: Bromodomain, conserved site (InterPro:IPR018359), Bromodomain (InterPro:IPR001487); BEST Arabidopsis thaliana protein match is: DNA-binding bromodomain-containin…	AT5G55040.2	1e-48	1082.24	484.349	1680.13	1.79446	1.69757e-09	6.49864e-07	1.79446
comp100796	Related to TOR proteins from yeast and mammals, regulators of cell growth in response to nutrient availability. TOR proteins belong to the family of phosphatidylinositol 3-kinase and are targets of the antiproliferative drug rapamycin. AtTOR binds the yeast FKBP12 protein in the presence of Rapamycin, is involved in embryogenesis and is expressed in embryos, endosperm and meristems.	AT1G50030.1	0	961.078	455.708	1466.45	1.68614	4.06068e-08	9.98158e-06	1.68614
comp100859	unknown protein; INVOLVED IN: biological_process unknown; EXPRESSED IN: 8 plant structures; EXPRESSED DURING: 4 anthesis, petal differentiation and expansion stage; BEST Arabidopsis thaliana protein match is: unknown protein (TAIR:AT3G55060.1).	AT2G39300.2	2e-23	599.59	328.888	870.292	1.4039	9.96242e-06	0.00101149	1.4039
comp100922	Encodes a nuclear-localized transcriptional activator with weak sequence similarity to basic helix-loop-helix(bHLH)-domain proteins. It promotes the production of stele cells in root meristems and is required to establish and maintain the normal vascular cell number and pattern in primary and lateral roots.	AT2G27230.2	4e-61	732.16	424.654	1039.67	1.29176	4.04205e-05	0.00317811	1.29176
comp101046	ATP binding microtubule motor family protein; FUNCTIONS IN: microtubule motor activity, ATP binding; INVOLVED IN: microtubule-based movement; LOCATED IN: chloroplast; CONTAINS InterPro DOMAIN/s: Kinesin, motor region, conserved site (InterPro:IPR019821), Kinesin, motor domain (InterPro:IPR001752); BEST Arabidopsis thaliana protein match is: P-loop containing nucleoside triphosphate hydrolases sup…	AT1G20060.1	3e-52	549.968	316.791	783.146	1.30575	2.08336e-05	0.00184282	1.30575
comp101048				619.969	241.514	998.424	2.04755	1.55988e-11	1.0213e-08	2.04755
comp101110	Encodes an &#945;-glucan, water dikinase required for starch degradation. Involved in cold-induced freezing tolerance. Mutations that eliminate the GWD protein or affect the dikinase domain of the enzyme dramatically reduce both the amount of phosphate in the amylopectin and the rate of starch degradation. Mature leaves of these mutants accumulate amounts of starch up to seven times greater than …	AT1G10760.1	3e-36	3216.38	1537	4895.75	1.67141	6.75897e-09	2.13869e-06	1.67141
comp101119	Encodes a chloroplast envelope-bound plant homeodomain (PHD) transcription factor with transmembrane domains that functions in multiple retrograde signal pathways. The proteolytic cleavage of PTM occurs in response to retrograde signals and amino-terminal PTM accumulates in the nucleus, where it activates aba ABI4 transcription in a PHD-dependent manner associated with histone modifications.	AT5G35210.2	3e-72	1164.81	607.396	1722.22	1.50356	6.67693e-07	0.000109035	1.50356
comp101137				446.633	228.102	665.165	1.54403	8.41056e-07	0.000131227	1.54403
comp101222	bi-functional dehydroquinate-shikimate dehydrogenase enzyme that catalyzes two steps in the chorismate biosynthesis pathway.	AT3G06350.1	1e-174	727.834	445.519	1010.15	1.18101	0.000107849	0.00699582	1.18101
comp101310				560.439	334.427	786.452	1.23367	6.55016e-05	0.00469201	1.23367
comp101493	protein with similarities to subunits of the Mediator complex, required for RNA polymerase II recruitment at target promoters in response to specific activators. Lines carrying loss of function mutations in the gene have reduced cell numbers in aerial organs. On the other hand, lines overexpressing the gene have increased number of small cells in clusters, suggesting cell division is more unsynch…	AT3G04740.1	0	503.135	279.426	726.845	1.37918	4.70717e-06	0.000547783	1.37918
comp101514				15.1728	3.10171	27.2439	3.1348	0.000123139	0.0077823	3.1348
comp101552	Member of MEKK subfamily, a component of the stomatal development regulatory pathway. Mutations in this locus result in embryo lethality.	AT1G63700.1	2e-114	532.56	305.985	759.135	1.31089	3.84466e-05	0.00307819	1.31089
comp101561	GYF domain-containing protein; FUNCTIONS IN: molecular_function unknown; INVOLVED IN: biological_process unknown; LOCATED IN: cellular_component unknown; EXPRESSED IN: 25 plant structures; EXPRESSED DURING: 14 growth stages; CONTAINS InterPro DOMAIN/s: GYF (InterPro:IPR003169); BEST Arabidopsis thaliana protein match is: GYF domain-containing protein (TAIR:AT1G24300.1); Has 1807 Blast hits to 180…	AT5G42950.1	6e-35	797.275	391.736	1202.81	1.61846	2.14944e-07	4.33951e-05	1.61846
comp101649	Tetratricopeptide repeat (TPR)-like superfamily protein; FUNCTIONS IN: binding; INVOLVED IN: biological_process unknown; LOCATED IN: cellular_component unknown; CONTAINS InterPro DOMAIN/s: Tetratricopeptide-like helical (InterPro:IPR011990), Tetratricopeptide repeat-containing (InterPro:IPR013026); Has 166 Blast hits to 153 proteins in 63 species: Archae - 8; Bacteria - 13; Metazoa - 66; Fungi - …	AT4G32820.1	0	1066.2	657.807	1474.58	1.16457	0.000131563	0.00818542	1.16457
comp101655				78.1675	9.98596	146.349	3.87337	6.70969e-17	1.17514e-13	3.87337
comp101672	retroelement pol polyprotein		2e-127	554.747	145.309	964.186	2.73019	7.87627e-19	2.04363e-15	2.73019
comp101704	Phosphatidylinositol 3- and 4-kinase family protein with FAT domain; FUNCTIONS IN: inositol or phosphatidylinositol kinase activity, binding, phosphotransferase activity, alcohol group as acceptor; EXPRESSED IN: 24 plant structures; EXPRESSED DURING: 13 growth stages; CONTAINS InterPro DOMAIN/s: Phosphatidylinositol 3-/4-kinase, catalytic (InterPro:IPR000403), PIK-related kinase, FAT (InterPro:IP…	AT2G17930.1	0	1176.33	470.645	1882.02	1.99957	2.22513e-11	1.34383e-08	1.99957
comp101713	A20/AN1-like zinc finger family protein; FUNCTIONS IN: DNA binding, zinc ion binding;	AT2G36320.1	5e-31	460.535	636.865	284.205	-1.16406	7.31845e-05	0.00508633	1.16406
comp101764				297.01	121.101	472.919	1.96538	9.81763e-10	3.97563e-07	1.96538
comp101812	Putative transcription factor. Member of the floral homeotic AGAMOUS pathway.Mutations in HUA enhance the phenotype of mild ag-4 allele. Single hua mutants are early flowering and have reduced levels of FLC mRNA. Other MADS box flowering time genes such as FLM and MAF2 also appear to be regulated by HUA2. HUA2 normally activates FLC expression and enhances AG function.	AT5G23150.1	2e-71	851.012	404.104	1297.92	1.6834	1.30689e-08	3.78327e-06	1.6834
comp101869				238.238	65.056	411.42	2.66086	5.37332e-16	8.00923e-13	2.66086
comp101920	Encodes NO VEIN (NOV), a plant-specific nuclear factor required for leaf vascular development, cellular patterning and stem cell maintenance in the root meristem, as well as for cotyledon outgrowth and separation. nov mutations affect many aspects of auxin-dependent development without directly affecting auxin perception. NOV is required for provascular PIN1 expression and region-specific express…	AT4G13750.1	0	1258.39	675.408	1841.36	1.44694	1.87363e-06	0.000253886	1.44694
comp101924	nucleic acid binding;zinc ion binding;DNA binding; FUNCTIONS IN: DNA binding, zinc ion binding, nucleic acid binding; INVOLVED IN: histone modification, transcription initiation; LOCATED IN: nucleus; EXPRESSED IN: guard cell, cultured cell; CONTAINS InterPro DOMAIN/s: Zinc finger, CCCH-type (InterPro:IPR000571), Zinc finger, PHD-type, conserved site (InterPro:IPR019786), Plus-3 domain, subgroup (…	AT2G16485.1	7e-96	658.285	323.121	993.448	1.62037	1.97721e-07	4.01493e-05	1.62037
comp102028	encodes a gene similar to callose synthase	AT5G13000.1	0	1830.92	849.176	2812.67	1.72781	6.89838e-09	2.16714e-06	1.72781
comp102034	predicted protein with 30% identity with MER3/RCK.	AT5G61140.2	0	1398.23	781.355	2015.1	1.3668	5.53601e-06	0.000620529	1.3668
comp102040	protein with a putative role in mRNA splicing.	AT3G52250.1	2e-25	1155.12	508.927	1801.31	1.82351	1.59806e-09	6.15128e-07	1.82351
comp102115	P-loop containing nucleoside triphosphate hydrolases superfamily protein; FUNCTIONS IN: microtubule motor activity, ATP binding; INVOLVED IN: microtubule-based movement; LOCATED IN: phragmoplast; EXPRESSED IN: 13 plant structures; EXPRESSED DURING: 7 growth stages; CONTAINS InterPro DOMAIN/s: Kinesin, motor domain (InterPro:IPR001752); BEST Arabidopsis thaliana protein match is: kinesin 1 (TAIR:A…	AT4G14330.1	3e-159	740.319	375.626	1105.01	1.55669	7.20715e-07	0.00011596	1.55669
comp102242	putative TRAPPII tethering factor required for cell plate assembly during cytokinesis.	AT5G54440.1	0	1002.72	615.384	1390.06	1.17558	9.80608e-05	0.00651778	1.17558
comp102257	xanthine dehydrogenase, involved in purine catabolism. Ubiquitously expressed, but the transcript level is altered during aging, senescence, salt and cold stress, ABA treatment, and dark treatment. RNAi lines that suppress both XDH1 and XDH2 produce small plants with reduced fertility and accelerated leaf senescence. Role in drought tolerance.	AT4G34890.1	0	556.426	300.675	812.176	1.43359	2.58707e-06	0.000327739	1.43359
comp102284	TPR; Encodes one of the 36 carboxylate clamp (CC)-tetratricopeptide repeat (TPR) proteins (Prasad 2010, Pubmed ID: 20856808) with potential to interact with Hsp90/Hsp70 as co-chaperones.	AT1G53300.1	3e-129	656.9	262.576	1051.22	2.00126	1.63476e-11	1.05069e-08	2.00126
comp102301	EMBRYO DEFECTIVE 1691 (EMB1691); FUNCTIONS IN: S-adenosylmethionine-dependent methyltransferase activity, methyltransferase activity, nucleic acid binding; INVOLVED IN: embryo development ending in seed dormancy; EXPRESSED IN: 24 plant structures; EXPRESSED DURING: 13 growth stages; CONTAINS InterPro DOMAIN/s: DNA methylase, N-6 adenine-specific, conserved site (InterPro:IPR002052), MT-A70 (Inter…	AT4G09980.1	3e-150	1112.32	643.935	1580.7	1.29558	1.38766e-05	0.00131633	1.29558
comp102348	Required for repair of pyrimidine-pyrimidinone (6-4) dimers.	AT3G28030.1	4e-117	894.998	429.747	1360.25	1.66231	3.63627e-08	9.13056e-06	1.66231
comp102363	hypothetical protein	AT4G16310.1	8e-165	802.081	441.142	1163.02	1.39856	4.79971e-06	0.000554379	1.39856
comp102425	histone-lysine N-methyltransferases; FUNCTIONS IN: histone-lysine N-methyltransferase activity; INVOLVED IN: regulation of transcription, DNA-dependent; LOCATED IN: chromosome; EXPRESSED IN: 19 plant structures; EXPRESSED DURING: 11 growth stages; CONTAINS InterPro DOMAIN/s: SRI, Set2 Rpb1 interacting (InterPro:IPR013257); BEST Arabidopsis thaliana protein match is: Zinc finger C-x8-C-x5-C-x3-H t…	AT3G26850.2	8e-22	709.953	317.83	1102.08	1.7939	2.59191e-09	9.26424e-07	1.7939
comp102472	plasma membrane localized ATPase transporter involved in multidrug transport. The expression of this gene is upregulated by herbicide safeners such as benoxacor, fluxofenim and fenclorim.	AT2G47800.1	0	234.197	93.3319	375.061	2.00668	4.1229e-09	1.38198e-06	2.00668
comp102485	Myosin-like proteins	AT1G50360.1	6e-78	1056.56	632.83	1480.29	1.22599	6.29452e-05	0.00456017	1.22599
comp102487	unknown protein; LOCATED IN: cellular_component unknown; EXPRESSED IN: 23 plant structures; EXPRESSED DURING: 14 growth stages.	AT2G25730.2	0	878.521	418.799	1338.24	1.67601	3.11503e-08	8.02304e-06	1.67601
comp102491	WD40/YVTN repeat-like-containing domain;Bromodomain; FUNCTIONS IN: nucleotide binding; LOCATED IN: CUL4 RING ubiquitin ligase complex; EXPRESSED IN: 24 plant structures; EXPRESSED DURING: 15 growth stages; CONTAINS InterPro DOMAIN/s: WD40 repeat 2 (InterPro:IPR019782), WD40 repeat, conserved site (InterPro:IPR019775), WD40 repeat (InterPro:IPR001680), Bromodomain (InterPro:IPR001487), G-protein b…	AT2G47410.2	3e-130	611.9	308.294	915.505	1.57026	4.53055e-07	7.99477e-05	1.57026
comp102498	P-loop containing nucleoside triphosphate hydrolases superfamily protein; FUNCTIONS IN: microtubule motor activity, ATP binding; INVOLVED IN: microtubule-based movement; LOCATED IN: plasma membrane; EXPRESSED IN: 9 plant structures; EXPRESSED DURING: F mature embryo stage, petal differentiation and expansion stage, E expanded cotyledon stage, D bilateral stage; CONTAINS InterPro DOMAIN/s: Kinesin…	AT1G21730.1	0	1345.71	701.736	1989.68	1.50354	5.52984e-07	9.26791e-05	1.50354
comp102570	BRUTUS (BTS), a putative E3 ligase protein with metal ion binding and DNA binding domains, which negatively regulates the response to iron deficiency.	AT3G18290.1	0	541.546	321.683	761.41	1.24304	0.000100613	0.00663083	1.24304
comp102593				224.554	364.492	84.6164	-2.10688	4.49106e-08	1.07381e-05	2.10688
comp102618	Encodes an eIF2alpha kinase that can bind uncharged tRNA via its C-terminus and can phosphorylate both eIF2alpha homologues in Arabidopsis.	AT3G59410.1	4e-105	660.353	378.177	942.53	1.31748	1.30586e-05	0.00125103	1.31748
comp102647				80.4169	27.9781	132.856	2.24749	4.33345e-08	1.04684e-05	2.24749
comp102650	Homeodomain-like transcriptional regulator; FUNCTIONS IN: sequence-specific DNA binding transcription factor activity; INVOLVED IN: regulation of transcription, DNA-dependent, regulation of transcription; LOCATED IN: nucleus; EXPRESSED IN: 22 plant structures; EXPRESSED DURING: 13 growth stages; CONTAINS InterPro DOMAIN/s: DDT domain superfamily (InterPro:IPR018501), Homeobox (InterPro:IPR001356)…	AT5G44180.1	0	1068.81	458.808	1678.82	1.87148	4.80832e-10	2.20164e-07	1.87148
comp102661	RFC1, the largest subunit of replication factor C. Mediates genomic stability and transcriptional gene silencing.	AT5G22010.1	4e-179	1684.71	1026.48	2342.94	1.19062	4.0319e-05	0.00317726	1.19062
comp102678	unknown protein	AT1G55540.1	5e-40	760.835	463.506	1058.16	1.1909	0.000103243	0.00674071	1.1909
comp102700	SMC6B (STRUCTURAL MAINTENANCE OF CHROMOSOMES 6B), a component of the SMC5/6 complex. SMC5/6 complex promotes sister chromatid alignment and homologous recombination after DNA damage.	AT5G61460.1	2e-97	1433.14	734.453	2131.82	1.53734	8.23544e-07	0.00012907	1.53734
comp102716	phosphoenolpyruvate carboxylase-related kinase 1 (PEPKR1); FUNCTIONS IN: protein serine/threonine kinase activity, protein kinase activity, kinase activity, ATP binding; INVOLVED IN: protein amino acid phosphorylation; LOCATED IN: cellular_component unknown; EXPRESSED IN: 22 plant structures; EXPRESSED DURING: 13 growth stages; CONTAINS InterPro DOMAIN/s: Protein kinase, ATP binding site (InterPr…	AT1G12580.1	1e-82	184.187	100.465	267.909	1.41505	3.32034e-05	0.0027398	1.41505
comp102724	Encodes a homolog of trithorax, a histone-lysine N-methyltransferase. Paralog of ATX1. Unlike ATX1 which is involved in trimethylating of histone H3-mysine 4, ATX2 is involved in dimethylating of histone H3-lysine 4. ATX1 and ATX2 influence the expression of largely nonoverlapping gene sets. The expression pattern of ATX2 is also different from that of ATX1.	AT1G05830.2	0	426.656	221.788	631.525	1.50966	1.64702e-06	0.000231694	1.50966
comp102742	RING/FYVE/PHD zinc finger superfamily protein; FUNCTIONS IN: DNA binding, zinc ion binding; INVOLVED IN: regulation of transcription, DNA-dependent; EXPRESSED IN: 25 plant structures; EXPRESSED DURING: 13 growth stages; CONTAINS InterPro DOMAIN/s: Zinc finger, PHD-type (InterPro:IPR001965), Zinc finger, FYVE/PHD-type (InterPro:IPR011011), Zinc finger, PHD-finger (InterPro:IPR019787); BEST Arabido…	AT5G16680.1	3e-27	1103.12	488.971	1717.26	1.81229	2.14523e-09	7.95167e-07	1.81229
comp102753	Encodes a subtilisin-like serine protease essential for mucilage release from seed coats.	AT5G67360.1	7e-36	80.4243	35.5951	125.254	1.8151	1.28361e-05	0.00123353	1.8151
comp102755	P-loop containing nucleoside triphosphate hydrolases superfamily protein; FUNCTIONS IN: nucleoside-triphosphatase activity, ATPase activity, nucleotide binding, ATP binding; EXPRESSED IN: 22 plant structures; EXPRESSED DURING: 13 growth stages; CONTAINS InterPro DOMAIN/s: ATPase, AAA-type, core (InterPro:IPR003959), ATPase, AAA+ type, core (InterPro:IPR003593), ATPase, AAA-type, conserved site (I…	AT3G15120.1	0	594.442	359.577	829.307	1.20561	0.00014795	0.00897385	1.20561
comp102772	tonoplast monosaccharide transporter3 (TMT3); CONTAINS InterPro DOMAIN/s: Sugar transporter, conserved site (InterPro:IPR005829), Major facilitator superfamily (InterPro:IPR020846), Sugar/inositol transporter (InterPro:IPR003663), General substrate transporter (InterPro:IPR005828), Major facilitator superfamily, general substrate transporter (InterPro:IPR016196); BEST Arabidopsis thaliana protein…	AT3G51490.2	2e-179	557.206	300.591	813.82	1.43691	4.56458e-07	8.01444e-05	1.43691
comp102780	kinesin-like protein PAK	AT1G12430.1	0	742.267	449.746	1034.79	1.20215	6.84542e-05	0.0048343	1.20215
comp102789				1625.05	2217.57	1032.52	-1.1028	6.65202e-05	0.00474073	1.1028
comp102794				1129.36	578.688	1680.02	1.53762	4.50168e-07	7.96929e-05	1.53762
comp102799	Encodes a protein that is predicted to act as a 1-phosphatidylinositol-3-phosphate (PtdIns3P) 5-kinase based on its homology to Fab1 from yeast. It contains an FYVE domain required for binding to PtdIns3P-containing membranes in yeast, as well as a Cpn60_TCP1 homology domain plus a kinase domain. fab1a/fab1b pollen grains not viable and have defective vacuolar organization. FAB1A and FAB1B comple…	AT4G33240.2	6e-39	380.457	181.373	579.541	1.67596	4.16326e-08	1.01624e-05	1.67596
comp102815	RNA-binding (RRM/RBD/RNP motifs) family protein; FUNCTIONS IN: RNA binding, nucleotide binding, nucleic acid binding; INVOLVED IN: biological_process unknown; LOCATED IN: cellular_component unknown; EXPRESSED IN: 23 plant structures; EXPRESSED DURING: 15 growth stages; CONTAINS InterPro DOMAIN/s: RNA recognition motif, RNP-1 (InterPro:IPR000504), Nucleotide-binding, alpha-beta plait (InterPro:IPR…	AT4G00830.2	1e-115	2007.57	1268.22	2746.91	1.115	0.000137023	0.00844264	1.115
comp102829	bacterial contamination			171.689	343.377	0	-Inf	2.75458e-11	1.63538e-08	Inf
comp102837	ARM repeat superfamily protein; FUNCTIONS IN: binding; INVOLVED IN: biological_process unknown; LOCATED IN: membrane; EXPRESSED IN: 22 plant structures; EXPRESSED DURING: 13 growth stages; CONTAINS InterPro DOMAIN/s: Armadillo-like helical (InterPro:IPR011989), Armadillo-type fold (InterPro:IPR016024); Has 448 Blast hits to 380 proteins in 145 species: Archae - 0; Bacteria - 0; Metazoa - 160; Fun…	AT2G26780.1	2e-163	770.432	413.787	1127.08	1.44562	1.31143e-06	0.000189429	1.44562
comp102898	sulfate transporter. Contains STAS domain. Expressed in roots and guard cells. Up-regulated by sulfur deficiency.	AT4G08620.1	0	2594.14	1569.54	3618.74	1.20515	1.7377e-05	0.00157971	1.20515
comp102904	putative c-myb-like transcription factor (MYB3R3) mRNA,	AT3G09370.1	7e-82	1011.97	499.646	1524.3	1.60917	1.28282e-07	2.7483e-05	1.60917
comp102906	plant specific DNA ligase that is involved in seed germination and DNA repair.	AT1G66730.1	0	476.402	264.895	687.908	1.37679	2.03956e-05	0.00180865	1.37679
comp102920	PHLOEM INTERCALATED WITH XYLEM (PXY); FUNCTIONS IN: protein serine/threonine kinase activity, protein kinase activity, ATP binding; INVOLVED IN: protein amino acid phosphorylation; LOCATED IN: plasma membrane; EXPRESSED IN: 20 plant structures; EXPRESSED DURING: 13 growth stages; CONTAINS InterPro DOMAIN/s: Protein kinase, ATP binding site (InterPro:IPR017441), Protein kinase, catalytic domain (I…	AT5G61480.1	0	304.876	173.104	436.648	1.33483	7.8775e-05	0.00540515	1.33483
comp102951	unknown; binding; FUNCTIONS IN: binding; INVOLVED IN: biological_process unknown; LOCATED IN: mitochondrion, nucleus; EXPRESSED IN: cotyledon, guard cell, cultured cell; CONTAINS InterPro DOMAIN/s: Armadillo-type fold (InterPro:IPR016024); BEST Arabidopsis thaliana protein match is: ARM repeat superfamily protein (TAIR:AT1G77600.2); Has 30201 Blast hits to 17322 proteins in 780 species: Archae - …	AT5G47690.2	2e-118	1501.75	843.77	2159.73	1.35593	5.56113e-06	0.000622349	1.35593
comp102953	Encodes a phosphatidylinositol 4-kinase that is expressed in inflorescences and shoots.	AT1G49340.1	0	1646.29	894.667	2397.91	1.42235	2.40357e-06	0.000309531	1.42235
comp102966	phosphofructokinase 4 (PFK4); CONTAINS InterPro DOMAIN/s: Pyrophosphate-dependent phosphofructokinase TP0108 (InterPro:IPR012004), Phosphofructokinase (InterPro:IPR000023); BEST Arabidopsis thaliana protein match is: phosphofructokinase 3 (TAIR:AT4G26270.1); Has 30201 Blast hits to 17322 proteins in 780 species: Archae - 12; Bacteria - 1396; Metazoa - 17338; Fungi - 3422; Plants - 5037; Viruses -…	AT5G61580.1	7e-42	229.5	119.663	339.336	1.50374	5.78324e-06	0.000643096	1.50374
comp102970	TBL (TRICHOME BIREFRINGENCE-LIKE) gene family containing a plant-specific DUF231 (domain of unknown function) domain. TBL gene family has 46 members, two of which (TBR/AT5G06700 and TBL3/AT5G01360) have been shown to be involved in the synthesis and deposition of secondary wall cellulose, presumably by influencing the esterification state of pectic polymers. A nomenclature for this gene family ha…	AT3G62390.1	3e-81	761.925	465.565	1058.28	1.18468	3.46083e-05	0.00283239	1.18468
comp102991	Protein kinase superfamily protein; FUNCTIONS IN: protein kinase activity, ATP binding; INVOLVED IN: protein amino acid phosphorylation; LOCATED IN: chloroplast; EXPRESSED IN: 22 plant structures; EXPRESSED DURING: 13 growth stages; CONTAINS InterPro DOMAIN/s: ABC-1 (InterPro:IPR004147), Protein kinase, catalytic domain (InterPro:IPR000719), Aminoglycoside phosphotransferase (InterPro:IPR002575),…	AT3G24190.1	0	652.915	410.789	895.041	1.12356	0.000126238	0.00791742	1.12356
comp103037	splicing factor SUA (suppressor of abi3-5), homologous to the human protein RBM5. Controls alternative splicing of the developmental regulator ABI3.	AT3G54230.2	2e-122	1064.63	586.079	1543.17	1.39673	2.37989e-06	0.000307476	1.39673
comp103050				588.705	150.367	1027.04	2.77193	7.3396e-20	2.23558e-16	2.77193
comp103098				29.9776	3.68096	56.2743	3.93432	3.30149e-09	1.13936e-06	3.93432
comp103126	LOM (LOST MERISTEMS) genes: AT2G45160 (LOM1), AT3G60630 (LOM2) and AT4G00150 (LOM3). LOM1 and LOM2 promote cell differentiation at the periphery of shoot meristems and help to maintain their polar organization.	AT3G60630.1	5e-49	1840.03	943.57	2736.49	1.53613	1.16395e-07	2.53235e-05	1.53613
comp103127	Involved in the promotion of the transition of the vegetative meristem to reproductive development. Four forms of the protein (alpha, beta, delta and gamma) are produced by alternative splicing. Involved in RNA-mediated chromatin silencing. At one point it was believed to act as an abscisic acid receptor but the paper describing that function was retracted.	AT4G16280.3	2e-67	434.447	217.05	651.844	1.5865	5.91353e-07	9.77072e-05	1.5865
comp103130	xyloglucan endotransglycosylase-related protein (XTR7)	AT4G14130.1	3e-89	438.938	678.772	199.105	-1.7694	2.88204e-06	0.000355466	1.7694
comp103172				977.351	531.52	1423.18	1.42092	2.132e-06	0.000280834	1.42092
comp103183	Homeodomain-like transcriptional regulator; FUNCTIONS IN: sequence-specific DNA binding transcription factor activity; INVOLVED IN: regulation of transcription, DNA-dependent, regulation of transcription; LOCATED IN: nucleus; EXPRESSED IN: 22 plant structures; EXPRESSED DURING: 13 growth stages; CONTAINS InterPro DOMAIN/s: DDT domain superfamily (InterPro:IPR018501), Homeobox (InterPro:IPR001356)…	AT5G44180.1	0	813.794	370.038	1257.55	1.76487	8.17065e-09	2.53276e-06	1.76487
comp103195	pleckstrin homology (PH) domain-containing protein; FUNCTIONS IN: molecular_function unknown; INVOLVED IN: biological_process unknown; EXPRESSED IN: 23 plant structures; EXPRESSED DURING: 13 growth stages; CONTAINS InterPro DOMAIN/s: Pleckstrin homology-type (InterPro:IPR011993), Protein of unknown function DUF946 (InterPro:IPR009291), Pleckstrin homology (InterPro:IPR001849); BEST Arabidopsis th…	AT4G17140.3	0	1468.27	576.93	2359.61	2.03208	5.60734e-10	2.43992e-07	2.03208
comp103233	Encodes a SWI/SWF nuclear-localized chromatin remodeling factor of the CHD3 group. Involved in post-germination repression of embryonic development. Acts with GA to establish repression of embryonic genes upon germination. Protein preferentially accumulates in differentiating tissues. Loss of function alleles are associated with expression of embryonic traits in adult plants and derepression of e…	AT2G25170.1	5e-124	1568.06	817.276	2318.84	1.50451	3.60063e-07	6.58605e-05	1.50451
comp103293	TBP-associated factor 2 (TAF2); FUNCTIONS IN: metallopeptidase activity, zinc ion binding; LOCATED IN: cellular_component unknown; EXPRESSED IN: 25 plant structures; EXPRESSED DURING: 15 growth stages; CONTAINS InterPro DOMAIN/s: Peptidase M1, membrane alanine aminopeptidase, N-terminal (InterPro:IPR014782); Has 6967 Blast hits to 5425 proteins in 796 species: Archae - 100; Bacteria - 1288; Metaz…	AT1G73960.1	0	1259.26	565.655	1952.87	1.7876	2.22424e-09	8.15818e-07	1.7876
comp103319	PAS domain-containing protein tyrosine kinase family protein; FUNCTIONS IN: protein serine/threonine/tyrosine kinase activity, kinase activity; INVOLVED IN: signal transduction, protein amino acid phosphorylation, regulation of transcription, DNA-dependent; EXPRESSED IN: 13 plant structures; EXPRESSED DURING: 4 anthesis, F mature embryo stage, petal differentiation and expansion stage, E expanded…	AT5G49470.3	0	1903.88	1064.58	2743.18	1.36557	2.32222e-06	0.000302952	1.36557
comp103323				30.2871	6.69002	53.8841	3.00978	1.71426e-06	0.000238282	3.00978
comp103338	(HKT1) sodium transporter; expressed in xylem parenchyma cells. Mutants over-accumulate sodium in shoot tissue and have increased sodium in the xylem sap and reduced sodium in phloem sap and roots.	AT4G10310.1	9e-21	681.299	412.427	950.17	1.20405	6.1497e-05	0.00447376	1.20405
comp103345	Member of the MAP215 family of microtubule-associated proteins required to establish interphase arrays of cortical microtubules.Mutants have defects in cytokinesis during pollen development. Vegetative phenotypes observed in temperature sensitive mutants include left-handed organ twisting, isotropic cell expansion and impairment of root hair polarity.	AT2G35630.1	0	3147.57	1528.72	4766.43	1.64059	2.77137e-08	7.3542e-06	1.64059
comp103379	ATP binding cassette transporter. Localized to the plasma membrane in uninfected cells. In infected leaves, the protein concentrated at infection sites. Contributes to nonhost resistance to inappropriate pathogens that enter by direct penetration in a salicylic acid?dependent manner. Required for mlo resistance. Has Cd transporter activity (Cd2+ extrusion pump) and contributes to heavy metal resi…	AT1G59870.1	0	582.039	311.381	852.697	1.45335	2.13263e-06	0.000280834	1.45335
comp103387	Encodes a protein with ABA 8'-hydroxylase activity, involved in ABA catabolism. Member of the CYP707A gene family. CYP707A1 appears to play an important role in determining the ABA levels in dry seeds. Gene involved in postgermination growth. Overexpression of CYP707A1 leads to a decrease in ABA levels and a reduction in after-ripening period to break dormancy.	AT4G19230.1	0	444.389	622.112	266.667	-1.22213	4.11745e-05	0.00323377	1.22213
comp103397	Kinase interacting (KIP1-like) family protein; FUNCTIONS IN: molecular_function unknown; INVOLVED IN: biological_process unknown; LOCATED IN: plasma membrane; EXPRESSED IN: 22 plant structures; EXPRESSED DURING: 10 growth stages; CONTAINS InterPro DOMAIN/s: KIP1-like (InterPro:IPR011684); BEST Arabidopsis thaliana protein match is: kinase interacting (KIP1-like) family protein (TAIR:AT1G03080.1);…	AT4G02710.1	1e-12	290.3	103.989	476.611	2.19639	2.12478e-12	1.81529e-09	2.19639
comp103405	Encodes autophagy-related 2 (ATG2).	AT3G19190.1	9e-38	581.256	340.582	821.93	1.27101	2.94609e-05	0.00247472	1.27101
comp103433	E3 ubiquitin ligase	AT5G05560.1	0	772.968	353.788	1192.15	1.75261	1.49201e-08	4.24895e-06	1.75261
comp103443	enzyme involved in trehalose biosynthesis. The protein has a trehalose synthase (TPS)-like domain but no trehalose phosphatase (TPP)-like domain. ATTPS1 is able to complement yeast tps1 mutants in vivo. The gene product modulates cell growth but not cell differentiation by determining cell wall deposition and cell division.	AT1G78580.1	0	448.653	270.594	626.712	1.21167	0.000119518	0.00759109	1.21167
comp103471	Beta-glucosidase, GBA2 type family protein; FUNCTIONS IN: glucosylceramidase activity, catalytic activity; INVOLVED IN: glucosylceramide catabolic process, sphingolipid metabolic process; LOCATED IN: plasma membrane; EXPRESSED IN: 25 plant structures; EXPRESSED DURING: 15 growth stages; CONTAINS InterPro DOMAIN/s: Glucosylceramidase (InterPro:IPR006775), Six-hairpin glycosidase-like (InterPro:IPR…	AT3G24180.2	5e-169	948.983	557.702	1340.26	1.26495	2.066e-05	0.00182978	1.26495
comp103479	phosphatidyl inositol monophosphate 5 kinase	AT3G09920.3	0	783.07	458.284	1107.86	1.27346	3.97259e-05	0.00315896	1.27346
comp103506	member of MRP subfamily	AT3G21250.1	2e-43	6223.83	3360.68	9086.99	1.43505	1.18696e-06	0.000175801	1.43505
comp103513	RING/U-box superfamily protein; FUNCTIONS IN: molecular_function unknown; INVOLVED IN: biological_process unknown; LOCATED IN: cellular_component unknown; EXPRESSED IN: cultured cell; BEST Arabidopsis thaliana protein match is: 2-oxoglutarate (2OG) and Fe(II)-dependent oxygenase superfamily protein (TAIR:AT3G12940.1); Has 120 Blast hits to 120 proteins in 15 species: Archae - 0; Bacteria - 0; Met…	AT3G19895.1	5e-101	419.785	209.591	629.979	1.58773	8.44642e-07	0.000131494	1.58773
comp103536	Related to yeast Spt6 protein, which functions as part of a protein complex in transcription initiation and also plays a role in chromatin structure / assembly.	AT1G65440.3	1e-94	249.429	113.788	385.071	1.75878	1.68607e-07	3.47409e-05	1.75878
comp103543	protein synthesis initiation factor 4G (EIF4G). A mutation in this gene (cum2-1) results in decreased accumulation of CMV coat protein in upper, uninoculated leaves. Likely affects cell-to-cell movement of the virus, also affects TCV multiplication.	AT3G60240.4	2e-176	10321.3	5391.99	15250.5	1.49997	2.9396e-07	5.52108e-05	1.49997
comp103550	CHR4, PKR1 | chromatin remodeling 4		2e-21	1044.8	406.739	1682.86	2.04874	9.30857e-12	6.58708e-09	2.04874
comp103576	unusual floral organs (UFO) Component of SCF(ASK-cullin-F-box) E3 ubiquitin ligase Required unusual floral organs (UFO)for the proper identity of the floral meristem. Involved in establishing the whorled pattern of floral organs, in the control of specification of the floral meristem, and in the activation of APETALA3 and PISTILLATA. UFO is found at the AP3 promoter in a LFY-dependent manner, sug…	AT1G30950.1	3e-115	280.341	166.581	394.102	1.24235	0.000159047	0.00951512	1.24235
comp103577	Zinc finger, RING-type;Transcription factor jumonji/aspartyl beta-hydroxylase; FUNCTIONS IN: sequence-specific DNA binding transcription factor activity, zinc ion binding; EXPRESSED IN: 24 plant structures; EXPRESSED DURING: 15 growth stages; CONTAINS InterPro DOMAIN/s: Transcription factor jumonji/aspartyl beta-hydroxylase (InterPro:IPR003347), Zinc finger, RING-type (InterPro:IPR001841), Transc…	AT1G09060.3	1e-11	154.37	47.4634	261.277	2.46069	3.43432e-12	2.83053e-09	2.46069
comp103607	encodes a gene similar to cellulose synthase	AT4G38190.1	0	220.322	114.537	326.107	1.50953	1.09217e-05	0.00107494	1.50953
comp103615				97.8689	14.784	180.954	3.61351	9.13262e-17	1.56047e-13	3.61351
comp103619	mutant has ABA hypersensitive inhibition of seed germination; Protein Phosphatase 2C; regulates the activation of the Snf1-related kinase OST1 by abscisic acid.	AT1G72770.3	1e-38	226.958	108.071	345.846	1.67815	1.36908e-07	2.88024e-05	1.67815
comp103690	GYF domain-containing protein; CONTAINS InterPro DOMAIN/s: GYF (InterPro:IPR003169); BEST Arabidopsis thaliana protein match is: GYF domain-containing protein (TAIR:AT1G27430.1).	AT1G24300.2	8e-36	1451.01	689.575	2212.44	1.68186	6.73345e-09	2.13869e-06	1.68186
comp103692	MEI2-like protein 5; AT1G29400.2		4e-30	1054.82	641.449	1468.19	1.19463	7.5687e-05	0.00523428	1.19463
comp103702	Encodes a histidine kinases, a cytokinin receptor that controls cytokinin-mediated leaf longevity through a specific phosphorylation of the response regulator, ARR2.	AT1G27320.1	9e-67	1099.74	628.105	1571.38	1.32295	1.09249e-05	0.00107494	1.32295
comp103715	ATPase E1-E2 type family protein / haloacid dehalogenase-like hydrolase family protein; FUNCTIONS IN: ATPase activity, coupled to transmembrane movement of ions, phosphorylative mechanism; INVOLVED IN: metabolic process, ATP biosynthetic process, phospholipid transport; LOCATED IN: integral to membrane, membrane; EXPRESSED IN: 22 plant structures; EXPRESSED DURING: 13 growth stages; CONTAINS Inte…	AT1G72700.1	0	887.258	494.25	1280.27	1.37313	4.95739e-06	0.00056577	1.37313
comp103747				42.666	5.16926	80.1627	3.9549	5.37295e-12	4.2293e-09	3.9549	yes
comp103896				29.1204	8.40092	49.84	2.56868	2.4185e-05	0.00209432	2.56868	yes
comp103924				28.1654	10.51	45.8208	2.12424	8.94981e-05	0.006052	2.12424
comp104034	Encodes an early light-inducible protein.	AT3G22840.1	1e-14	219.176	104.244	334.108	1.68035	2.70907e-08	7.21622e-06	1.68035
comp104058	Encodes a novel, plant-specific microtubule-associated protein that regulates the orientation of cortical microtubules and the direction of organ growth. The protein plays a role in control of microtubule dependent anisotropic cell elongation. spr2 mutant rosette leaves, cauline leaves, roots, petioles and petals curl in an anticlockwise direction.	AT4G27060.1	5e-44	91.4204	39.406	143.435	1.86391	4.79703e-06	0.000554379	1.86391
comp104059	abscisic acid responsive element-binding factor 1; protein that binds to abscisic acid response elements. May mediate transcriptional regulation of ABA responses.	AT1G49720.1	8e-29	80.9341	27.7742	134.094	2.27143	4.98002e-08	1.17865e-05	2.27143
comp104184				22.308	2.9669	41.6491	3.81126	6.69524e-06	0.000720494	3.81126
comp104212				21.0229	2.30881	39.737	4.10526	6.95452e-07	0.000112519	4.10526
comp104299	ACT domain repeat 3 (ACR3); FUNCTIONS IN: amino acid binding; INVOLVED IN: nitrogen compound metabolic process, metabolic process; LOCATED IN: cytosol; EXPRESSED IN: 22 plant structures; EXPRESSED DURING: 13 growth stages; CONTAINS InterPro DOMAIN/s: Protein-PII uridylyltransferase (InterPro:IPR010043), Amino acid-binding ACT (InterPro:IPR002912); BEST Arabidopsis thaliana protein match is: ACT d…	AT1G76990.5	7e-14	25.3717	7.67716	43.0663	2.48791	4.99008e-05	0.00377114	2.48791	yes
comp104353				54.9842	87.473	22.4954	-1.95921	1.47652e-05	0.00138727	1.95921
comp104391	encodes a high-affinity inositol hexakisphosphate transporter that plays a role in guard cell signaling and phytate storage. It is a member of MRP subfamily / ABC transporter subfamily C.	AT1G04120.1	0	788.778	385.221	1192.33	1.63003	3.85e-08	9.56439e-06	1.63003
comp104410	Interacts with AtrbohD gene to fine tune the spatial control of ROI production and hypersensitive response to cell in and around infection site.	AT1G64060.1	0	874.611	408.804	1340.42	1.7132	8.45977e-09	2.61083e-06	1.7132
comp104459				17.1014	4.5665	29.6362	2.6982	0.000144486	0.0088464	2.6982	yes
comp104490	RING/U-box superfamily protein; FUNCTIONS IN: zinc ion binding; INVOLVED IN: biological_process unknown; LOCATED IN: cellular_component unknown; CONTAINS InterPro DOMAIN/s: Zinc finger, C3HC4 RING-type (InterPro:IPR018957), Zinc finger, RING-CH-type (InterPro:IPR011016); BEST Arabidopsis thaliana protein match is: RING/U-box superfamily protein (TAIR:AT3G09760.1); Has 30201 Blast hits to 17322 pr…	AT5G60580.3	4e-35	423.269	213.188	633.35	1.57088	4.59417e-07	8.02726e-05	1.57088
comp104507	polyadenylate-binding protein, putative / PABP, putative, non-consensus splice donor TA at exon 1; similar to polyadenylate-binding protein (poly(A)-binding protein) from (Triticum aestivum) GI:1737492, (Nicotiana tabacum) GI:7673355, {Arabidopsis thaliana} SP:P42731; contains InterPro entry IPR000504: RNA-binding region RNP-1 (RNA recognition motif) (RRM). Only member of the class IV PABP family.	AT1G34140.1	4e-12	1925.03	1144.87	2705.19	1.24055	2.2088e-05	0.00193604	1.24055
comp104529				8.97985	17.9597	0	-Inf	1.51897e-07	3.16705e-05	Inf
comp104548				16.4588	2.54521	30.3723	3.5769	3.90763e-05	0.00311083	3.5769
comp104556	Encodes a putative transmembrane protein carrying four C(2) domains, suggesting that QKY may function in membrane trafficking in a Ca(2+)-dependent fashion. Mutant analysis shows that this gene is involved in organ development.	AT1G74720.1	4e-30	82.5389	38.4929	126.585	1.71744	4.26835e-05	0.00334156	1.71744
comp104561	Enzyme catalyzing the first committed step in aromatic amino acid biosynthesis	AT4G33510.2	1e-26	31.1532	5.18306	57.1233	3.4622	5.24517e-08	1.22485e-05	3.4622
comp104575	armadillo/beta-catenin repeat kinesin motor family. Mutants have twisted roots due to abnormal cell file rotation; the phenotype is dependent on microtubules.	AT1G01950.1	0	3208.63	1789.39	4627.86	1.37088	3.62586e-06	0.000435701	1.37088
comp104611				70.3704	33.4854	107.255	1.67945	6.18315e-05	0.00449343	1.67945
comp104614	plasma membrane localized ATPase transporter involved in multidrug transport. The expression of this gene is upregulated by herbicide safeners such as benoxacor, fluxofenim and fenclorim.	AT2G47800.1	2e-47	28.4533	6.08241	50.8241	3.0628	5.57171e-05	0.00413487	3.0628
comp104704	Plant protein of unknown function (DUF869); FUNCTIONS IN: molecular_function unknown; INVOLVED IN: biological_process unknown; EXPRESSED IN: 22 plant structures; EXPRESSED DURING: 13 growth stages; CONTAINS InterPro DOMAIN/s: Protein of unknown function DUF869, plant (InterPro:IPR008587); BEST Arabidopsis thaliana protein match is: Plant protein of unknown function (DUF869) (TAIR:AT1G47900.2).	AT1G19835.2	5e-87	1748.65	722.547	2774.75	1.9412	1.82905e-11	1.14407e-08	1.9412
comp104733	chloroplastidic phosphoglucan, water dikinase (PWD) which is required for normal degradation of leaf starch in Arabidopsis. NMR analysis of the mutants, suggests that the gene is specifically involved in the phosphorylation of the glucosyl residues of starch at the C3 position.	AT5G26570.1	0	786.802	385.157	1188.45	1.62556	7.21498e-08	1.64108e-05	1.62556
comp104791				13.8196	1.13575	26.5034	4.54446	1.76837e-06	0.000244349	4.54446
comp104937				97.7396	40.5322	154.947	1.93464	2.35112e-07	4.65282e-05	1.93464
comp104999	ATP-binding cassette (ABC) transporter. Expressed in the vascular tissue of primary stem.	AT1G02520.1	7e-170	651.397	173.906	1128.89	2.69852	1.1619e-18	2.90708e-15	2.69852
comp105027	Nuclear encoded protein consists of the five domains conserved in EF-G proteins, with two GTP-binding sites in the first domain, and an additional transit peptide at the N-terminus. Localized in chloroplasts. Point mutation results in a delay in the onset of germination. At early developmental stage embryos still contain undifferentiated proplastids. The greening of cotyledons is severely impaire…	AT1G62750.1	5e-52	39.0753	61.5645	16.5862	-1.89211	7.63659e-05	0.00526046	1.89211	yes
comp105064				2393.8	1121.14	3666.45	1.70942	8.87982e-09	2.71653e-06	1.70942
comp105068	Histidine kinase: cytokinin-binding receptor that transduces cytokinin signals across the plasma membrane	AT2G01830.1	3e-39	730.465	341.426	1119.5	1.71322	3.52697e-08	8.92005e-06	1.71322	yes
comp105101	Serine/threonine protein kinase, whose transcription is regulated by circadian rhythm.	AT3G04910.1	8e-17	522.185	186.712	857.658	2.19959	1.99879e-12	1.72873e-09	2.19959
comp105128	Pectin lyase-like superfamily protein; FUNCTIONS IN: pectinesterase activity; INVOLVED IN: cell wall modification; LOCATED IN: cell wall, plant-type cell wall, cytoplasm; EXPRESSED IN: 17 plant structures; EXPRESSED DURING: 8 growth stages; CONTAINS InterPro DOMAIN/s: Pectinesterase, active site (InterPro:IPR018040), Pectin lyase fold/virulence factor (InterPro:IPR011050), Pectinesterase, catalyt…	AT5G19730.1	2e-74	139.965	71.2137	208.716	1.55132	2.33428e-05	0.00202892	1.55132
comp105192	Remorin family protein; FUNCTIONS IN: DNA binding; INVOLVED IN: biological_process unknown; LOCATED IN: nucleus; EXPRESSED IN: 23 plant structures; EXPRESSED DURING: 12 growth stages; CONTAINS InterPro DOMAIN/s: Remorin, C-terminal (InterPro:IPR005516); BEST Arabidopsis thaliana protein match is: Remorin family protein (TAIR:AT2G02170.2); Has 1722 Blast hits to 1339 proteins in 252 species: Archa…	AT1G67590.1	7e-12	632.137	357.355	906.919	1.34362	1.08375e-05	0.00107085	1.34362
comp105238	ABC transporter family involved in ABA transport and resistance to lead. Localizes to plasma membrane. Upregulated by lead. Expressed in leaves, flowers, stomata and roots.	AT1G15520.1	2e-159	31.3403	6.30501	56.3755	3.1605	1.11158e-07	2.43352e-05	3.1605
comp105281				26.1725	5.27571	47.0693	3.15735	1.03538e-06	0.000155798	3.15735
comp105321				19.9605	5.1506	34.7704	2.75504	5.77469e-05	0.00425844	2.75504
comp105349				11.769	1.2657	22.2723	4.13724	5.59824e-05	0.00415016	4.13724
comp105368	xyloglucan endotransglucosylase/hydrolase 8	AT1G11545.1	1e-81	16.3048	31.5664	1.04318	-4.91933	2.19359e-09	8.08811e-07	4.91933
comp105485	retrotransposon ty3-gypsy subclass		1.5e-55	24.9979	3.21301	46.7828	3.86398	0.000121494	0.00770259	3.86398
comp105542				46.3593	17.3846	75.3341	2.1155	5.91878e-06	0.000657125	2.1155	yes
comp105610				35.7352	5.81764	65.6528	3.49635	8.60598e-10	3.54647e-07	3.49635
comp105622	RNA-binding (RRM/RBD/RNP motifs) family protein; FUNCTIONS IN: RNA binding, nucleotide binding, nucleic acid binding; EXPRESSED IN: 22 plant structures; EXPRESSED DURING: 13 growth stages; CONTAINS InterPro DOMAIN/s: RNA recognition motif, RNP-1 (InterPro:IPR000504), Nucleotide-binding, alpha-beta plait (InterPro:IPR012677); BEST Arabidopsis thaliana protein match is: SC35-like splicing factor 28…	AT2G21440.1	5e-72	1503.19	829.838	2176.54	1.39113	4.38182e-06	0.000516789	1.39113
comp105740				17.8646	4.01486	31.7143	2.98171	6.81836e-05	0.00482005	2.98171
comp105757	Encodes a protein required for photosystem I assembly and stability. In Chlamydomonas reinhardtii, this protein seems to act as a PSI specific chaperone facilitating the assembly of the complex by interacting with PsaA and PsaD. A loss of function mutation in tobacco leads to a loss of photosystem I.	ATCG00360.1	2e-19	86.4726	145.423	27.5221	-2.40159	6.64972e-05	0.00474073	2.40159
comp105798	auxin response factor that contains the conserved VP1-B3 DNA-binding domain at its N-terminus and the Aux/IAA-like domains III and IV present in most ARFs at its C-terminus. The protein interacts with IAA1 (yeast two hybrid) and other auxin response elements such as ER7 and ER9 (yeast one hybrid). ARF19 protein can complement many aspects of the arf7 mutant phenotype and , together with ARF7, is …	AT1G19220.1	5e-53	35.5808	9.53182	61.6299	2.69281	1.18958e-06	0.000175818	2.69281
comp105826	unknown protein; FUNCTIONS IN: molecular_function unknown; INVOLVED IN: biological_process unknown; LOCATED IN: cellular_component unknown; EXPRESSED IN: 26 plant structures; EXPRESSED DURING: 15 growth stages; Has 27734 Blast hits to 16708 proteins in 1259 species: Archae - 81; Bacteria - 3434; Metazoa - 10876; Fungi - 2514; Plants - 987; Viruses - 212; Other Eukaryotes - 9630 (source: NCBI BLin…	AT3G50370.1	5e-29	4689.17	1827.65	7550.7	2.04662	1.56592e-12	1.44345e-09	2.04662
comp105859	RNA-binding (RRM/RBD/RNP motifs) family protein; FUNCTIONS IN: RNA binding, nucleotide binding, nucleic acid binding; EXPRESSED IN: 22 plant structures; EXPRESSED DURING: 12 growth stages; CONTAINS InterPro DOMAIN/s: RNA recognition motif, RNP-1 (InterPro:IPR000504), Nucleotide-binding, alpha-beta plait (InterPro:IPR012677); BEST Arabidopsis thaliana protein match is: RNA-binding (RRM/RBD/RNP mot…	AT2G44710.1	7e-83	2257.3	1203.27	3311.33	1.46045	4.12982e-07	7.39946e-05	1.46045
comp105862	C-terminal domain phosphatase-like 3 (CPL3); FUNCTIONS IN: phosphoprotein phosphatase activity, CTD phosphatase activity; INVOLVED IN: response to salt stress; LOCATED IN: nucleus; EXPRESSED IN: 22 plant structures; EXPRESSED DURING: 12 growth stages; CONTAINS InterPro DOMAIN/s: FCP1-like phosphatase, phosphatase domain (InterPro:IPR011947), NLI interacting factor (InterPro:IPR004274), BRCT (Inte…	AT2G33540.1	1e-93	353.798	214.017	493.58	1.20556	0.00013752	0.00846579	1.20556
comp105865	LSD1-like 3 (LDL3); FUNCTIONS IN: primary amine oxidase activity; EXPRESSED IN: cultured cell; CONTAINS InterPro DOMAIN/s: Amine oxidase (InterPro:IPR002937), Adrenodoxin reductase (InterPro:IPR000759), SWIRM (InterPro:IPR007526); BEST Arabidopsis thaliana protein match is: Flavin containing amine oxidoreductase family protein (TAIR:AT3G10390.1); Has 1823 Blast hits to 1718 proteins in 423 specie…	AT4G16310.1	0	500.65	290.602	710.698	1.29019	4.04091e-05	0.00317811	1.29019
comp105872	A regulator of auxin efflux and involved in differential growth. PIN3 is expressed in gravity-sensing tissues, with PIN3 protein accumulating predominantly at the lateral cell surface. PIN3 localizes to the plasma membrane and to vesicles. In roots, PIN3 is expressed without pronounced polarity in tiers two and three of the columella cells, at the basal side of vascular cells, and to the lateral …	AT1G70940.1	5e-156	2481.03	1573.53	3388.54	1.10666	0.000153147	0.00923313	1.10666
comp105882				90.3105	15.4559	165.165	3.41768	7.63304e-16	1.11404e-12	3.41768
comp105961	T-complex protein 11; CONTAINS InterPro DOMAIN/s: T-complex 11 (InterPro:IPR008862); BEST Arabidopsis thaliana protein match is: T-complex protein 11 (TAIR:AT4G09150.1); Has 9929 Blast hits to 7090 proteins in 817 species: Archae - 19; Bacteria - 1454; Metazoa - 4175; Fungi - 699; Plants - 382; Viruses - 14; Other Eukaryotes - 3186 (source: NCBI BLink).	AT1G22930.1	5e-100	279.589	151.534	407.644	1.42767	2.52028e-05	0.00216905	1.42767
comp105977	homeobox-leucine zipper family protein belonging to the HD-ZIP IV family. Mutants have trichomes that appear glass-like under a dissecting microscope as compared to the wild-type trichomes. The mutations do not affect trichome growth or branch number.	AT1G05230.4	0	1400.42	748.321	2052.51	1.45566	9.70609e-07	0.000147819	1.45566
comp106003	alpha/beta-Hydrolases superfamily protein; CONTAINS InterPro DOMAIN/s: Abortive infection protein (InterPro:IPR003675); BEST Arabidopsis thaliana protein match is: esterase/lipase/thioesterase family protein (TAIR:AT3G50790.1); Has 27771 Blast hits to 17358 proteins in 1793 species: Archae - 160; Bacteria - 9618; Metazoa - 7252; Fungi - 2757; Plants - 1033; Viruses - 122; Other Eukaryotes - 6829 …	AT2G03140.1	4e-103	500.016	191.052	808.98	2.08214	1.73842e-11	1.09718e-08	2.08214
comp106012	Acyl-CoA N-acyltransferase with RING/FYVE/PHD-type zinc finger protein; CONTAINS InterPro DOMAIN/s: Zinc finger, PHD-type (InterPro:IPR001965), Zinc finger, FYVE/PHD-type (InterPro:IPR011011), Acyl-CoA N-acyltransferase (InterPro:IPR016181), Zinc finger, PHD-finger (InterPro:IPR019787); BEST Arabidopsis thaliana protein match is: Acyl-CoA N-acyltransferase with RING/FYVE/PHD-type zinc finger prot…	AT1G05380.2	5e-111	1145.28	688.188	1602.38	1.21934	4.02117e-05	0.00317726	1.21934
comp106055	protein that has adenylylsulfate sulfohydrolase activity (E.C. 3.6.2.1) in vitro.	AT5G01310.1	3e-14	12.3123	0	24.6245	Inf	3.50651e-06	0.000425121	Inf
comp106057	member of Myosin-like proteins	AT4G33200.3	1e-21	25.2859	7.80711	42.7647	2.45356	9.97348e-05	0.00658532	2.45356
comp106062				32.2974	53.6689	10.9258	-2.29634	2.93626e-05	0.00247226	2.29634
comp106074	gene of unknown function expressed in seedlings, flower buds and stems	AT4G17330.1	1e-37	1826.62	1049.06	2604.19	1.31174	2.09489e-05	0.00184738	1.31174
comp106110	Xyloglucan fucosyltransferase family	AT1G14070.1	2e-62	463.47	255.428	671.512	1.3945	4.0544e-06	0.00047898	1.3945
comp106155	Encodes a splicing factor SUA (suppressor of abi3-5), homologous to the human protein RBM5. Controls alternative splicing of the developmental regulator ABI3.	AT3G54230.2	6e-178	771.043	399.14	1142.95	1.51779	6.32091e-07	0.000103704	1.51779
comp106199	chalcone synthase (CHS)	AT5G13930.1	8e-116	617.131	871.784	362.479	-1.26607	0.000160118	0.00956287	1.26607
comp106205	Member of the R2R3 Myb factor gene family.	AT2G32460.1	3e-41	12.0583	0	24.1166	Inf	1.83809e-07	3.7542e-05	Inf
comp106266	glycosyl transferase family 1 protein; FUNCTIONS IN: transferase activity, transferring glycosyl groups; INVOLVED IN: biosynthetic process; LOCATED IN: cellular_component unknown; EXPRESSED IN: 22 plant structures; EXPRESSED DURING: 13 growth stages; CONTAINS InterPro DOMAIN/s: Glycosyl transferase, group 1 (InterPro:IPR001296); BEST Arabidopsis thaliana protein match is: UDP-Glycosyltransferase …	AT4G01210.1	0	1219.37	710.689	1728.05	1.28186	2.69563e-05	0.00229181	1.28186
comp106297	Involved in ethylene signal transduction. Acts downstream of CTR1. Positively regulates ORE1 and negatively regulates mir164A,B,C to regulate leaf senescence. A maternally expressed imprinted gene. Mutations in ein2 block ethylene stimulation of flavonol synthesis.	AT5G03280.1	1e-64	1163.09	665.168	1661	1.32026	1.481e-05	0.00138727	1.32026
comp106310	A20/AN1-like zinc finger family protein; FUNCTIONS IN: DNA binding, zinc ion binding; INVOLVED IN: biological_process unknown; LOCATED IN: cellular_component unknown; CONTAINS InterPro DOMAIN/s: Zinc finger, AN1-type (InterPro:IPR000058), Zinc finger, A20-type (InterPro:IPR002653); BEST Arabidopsis thaliana protein match is: A20/AN1-like zinc finger family protein (TAIR:AT4G12040.2); Has 1075 Bla…	AT1G12440.2	1e-23	141.368	218.973	63.7634	-1.77995	5.36668e-07	9.0377e-05	1.77995
comp106324	P-loop containing nucleoside triphosphate hydrolases superfamily protein; FUNCTIONS IN: microtubule motor activity, ATP binding; INVOLVED IN: microtubule-based movement; EXPRESSED IN: 23 plant structures; EXPRESSED DURING: 13 growth stages; CONTAINS InterPro DOMAIN/s: Kinesin, motor region, conserved site (InterPro:IPR019821), Kinesin, motor domain (InterPro:IPR001752); BEST Arabidopsis thaliana …	AT3G12020.1	0	467.768	280.833	654.703	1.22113	0.000126033	0.00791161	1.22113
comp106375	PIN; Encodes a putative auxin efflux carrier that is localized in developing and mature root meristems. It is involved in the maintenance of embryonic auxin gradients. A role for AtPIN4 in generating a sink for auxin below the quiescent center of the root meristem that is essential for auxin distribution and patterning is proposed. In the root, PIN4 is detected around the quiescent center and cel…	AT2G01420.1	4e-166	305.787	109.25	502.323	2.20098	4.82132e-11	2.68065e-08	2.20098
comp106448				11.0154	0	22.0308	Inf	6.80253e-07	0.00011057	Inf
comp106457				237.034	97.92	376.148	1.94162	1.05533e-09	4.24898e-07	1.94162
comp106460	Encodes a large protein with N-terminal bromo-adjacent homology (BAH) and transcription elongation factor S-II (TFS2N) domains and two C-terminal GW (glycine and tryptophan) repeats. It is nuclear and colocalizes with the processing-body component DCP1 in the cytoplasm. SOU is a component of the miRNA pathway and is involved in translational repression.	AT3G48050.2	5e-32	513.704	273.2	754.207	1.465	7.80767e-06	0.000815463	1.465
comp106511				984.018	141.334	1826.7	3.69206	6.27692e-18	1.4185e-14	3.69206
comp106546	WD/BEACH domain protein SPIRRIG Encodes a WD/BEACH domain protein involved in cell morphogenesis.	AT1G03060.1	0	4022.88	1437.89	6607.87	2.20024	5.7563e-14	6.83497e-11	2.20024
comp106568	DNA repair gene. gamma-radiation hypersensitive (RAD5) involved in stable transformation and T-DNA transfer	AT5G22750.1	0	512.654	292.176	733.132	1.32723	1.7408e-05	0.00157971	1.32723
comp106573	Bromodomain protein with a DNA binding motif	AT1G61215.1	2e-21	410.737	240.04	581.434	1.27634	0.000148434	0.00899542	1.27634
comp106579	ARM repeat superfamily protein; FUNCTIONS IN: binding; LOCATED IN: cellular_component unknown; EXPRESSED IN: 22 plant structures; EXPRESSED DURING: 13 growth stages; CONTAINS InterPro DOMAIN/s: Armadillo-type fold (InterPro:IPR016024); Has 594 Blast hits to 356 proteins in 168 species: Archae - 0; Bacteria - 0; Metazoa - 252; Fungi - 233; Plants - 48; Viruses - 0; Other Eukaryotes - 61 (source: N…	AT5G48120.1	2e-114	912.891	545.148	1280.63	1.23214	4.43565e-05	0.00344124	1.23214
comp106631	Encodes a SWI2/SNF2-like protein in the SNF2 subclass. Homozygous plants with null mutations exhibit premature termination of the meristem and carpelloid structures from the inflorescence meristem. Co-activator of floral homeotic gene expression. Acts with LFY to regulate shoot apical meristem identity. Required for meristem maintenance. Regulates flowering under a non-inductive photoperiod. It p…	AT2G28290.1	0	2173.26	1022.58	3323.93	1.70067	7.99716e-08	1.79567e-05	1.70067
comp106634	Encodes a protein with histone lysine N-methyltransferase activity required specifically for the trimethylation of H3-K4 in FLC chromatin (and not in H3-K36 dimethylation). Acts as an inhibitor of flowering specifically involved in the autonomous promotion pathway. EFS also regulates the expression of genes involved in carotenoid biosynthesis.Modification of histone methylation at the CRTISO locu…	AT1G77300.2	2e-94	2067.38	1002.09	3132.68	1.64439	2.13139e-08	5.83267e-06	1.64439
comp106720	callose synthase	AT5G13000.1	0	1968.17	901.161	3035.18	1.75193	3.82168e-09	1.28717e-06	1.75193
comp106733				43.1177	6.90777	79.3277	3.52153	3.26762e-10	1.53635e-07	3.52153
comp106738	encodes a member of the DREB subfamily A-5 of ERF/AP2 transcription factor family. The protein contains one AP2 domain. There are 16 members in this subfamily including RAP2.1, RAP2.9 and RAP2.10.	AT5G67190.1	1e-19	182.805	280.039	85.5717	-1.71042	3.64364e-07	6.64737e-05	1.71042
comp106760	embryo defective 3011 (EMB3011); FUNCTIONS IN: RNA helicase activity, helicase activity, nucleic acid binding, ATP-dependent helicase activity, ATP binding; INVOLVED IN: embryo development ending in seed dormancy; LOCATED IN: cellular_component unknown; EXPRESSED IN: 25 plant structures; EXPRESSED DURING: 15 growth stages; CONTAINS InterPro DOMAIN/s: Helicase-associated domain (InterPro:IPR007502…	AT5G13010.1	0	1121.15	606.45	1635.85	1.43158	1.51333e-06	0.000215047	1.43158
comp106779				43.8899	19.7957	67.984	1.78001	0.000130682	0.00815233	1.78001
comp106806				1372.93	695.121	2050.73	1.5608	2.88954e-07	5.44166e-05	1.5608
comp106825				22.6823	1.377	43.9876	4.99749	9.19127e-10	3.76552e-07	4.99749
comp106858	member of WRKY Transcription Factor; Group II-b	AT4G04450.1	8e-54	114.72	64.1318	165.308	1.36605	6.63704e-05	0.00474073	1.36605
comp106888				199.427	79.2959	319.558	2.01076	1.43576e-08	4.12228e-06	2.01076
comp106921	loricrin-related (TAIR:AT5G64550.1); Has 3596 Blast hits to 2004 proteins in 150 species: Archae - 0; Bacteria - 54; Metazoa - 1597; Fungi - 38; Plants - 513; Viruses - 9; Other Eukaryotes - 1385 (source: NCBI BLink).	AT1G64140.1	3e-129	705.738	438.182	973.294	1.15134	9.61372e-05	0.00640817	1.15134
comp106922	Zinc finger (C3HC4-type RING finger) family protein; FUNCTIONS IN: ubiquitin-protein ligase activity, zinc ion binding; INVOLVED IN: N-terminal protein myristoylation; LOCATED IN: plasma membrane; EXPRESSED IN: 24 plant structures; EXPRESSED DURING: 15 growth stages; CONTAINS InterPro DOMAIN/s: Zinc finger, RING-type (InterPro:IPR001841), Zinc finger, C3HC4 RING-type (InterPro:IPR018957), von Wil…	AT5G60710.1	2e-132	139.974	71.6906	208.258	1.53851	3.73855e-05	0.00301737	1.53851
comp106928				156.253	73.8558	238.651	1.69212	1.06349e-06	0.000159196	1.69212	yes
comp106987	Glycosyltransferase family 29 (sialyltransferase) family protein; FUNCTIONS IN: sialyltransferase activity; INVOLVED IN: protein amino acid glycosylation; LOCATED IN: endomembrane system, integral to Golgi membrane, membrane; EXPRESSED IN: 20 plant structures; EXPRESSED DURING: 11 growth stages; CONTAINS InterPro DOMAIN/s: Sialyltransferase (InterPro:IPR012163), Glycosyl transferase, family 29 (I…	AT1G08280.1	2e-38	57.4191	24.4312	90.407	1.88771	2.98577e-05	0.00250205	1.88771
comp106997				29.7587	4.82156	54.6959	3.50386	2.92233e-08	7.61065e-06	3.50386
comp107011				44.4972	9.61066	79.3838	3.04614	5.02159e-09	1.65161e-06	3.04614
comp107027				71.3117	26.4608	116.163	2.13422	5.17367e-08	1.21626e-05	2.13422
comp107053				165.126	48.682	281.57	2.53203	1.84185e-12	1.61291e-09	2.53203
comp107062	Aluminium induced protein with YGL and LRDR motifs; FUNCTIONS IN: molecular_function unknown; INVOLVED IN: biological_process unknown; LOCATED IN: cytosol, nucleus, plasma membrane; EXPRESSED IN: 24 plant structures; EXPRESSED DURING: 15 growth stages; BEST Arabidopsis thaliana protein match is: Aluminium induced protein with YGL and LRDR motifs (TAIR:AT5G43830.1); Has 1324 Blast hits to 1324 pro…	AT3G22850.1	4e-77	72.3403	112.047	32.6339	-1.77965	6.10911e-05	0.00445348	1.77965
comp107141	dentin sialophosphoprotein-related; BEST Arabidopsis thaliana protein match is: unknown protein (TAIR:AT5G07940.2); Has 1336 Blast hits to 783 proteins in 174 species: Archae - 4; Bacteria - 291; Metazoa - 248; Fungi - 128; Plants - 141; Viruses - 0; Other Eukaryotes - 524 (source: NCBI BLink).	AT5G07980.1	4e-23	398.449	213.082	583.817	1.45411	6.62127e-06	0.00071363	1.45411
comp107175	pathogenesis-related family protein; Has 201 Blast hits to 200 proteins in 70 species: Archae - 0; Bacteria - 51; Metazoa - 15; Fungi - 40; Plants - 93; Viruses - 0; Other Eukaryotes - 2 (source: NCBI BLink).	AT1G78780.2	6e-64	27.7075	48.0877	7.32728	-2.71432	3.64332e-06	0.000437048	2.71432
comp107182	Leucine-rich repeat protein kinase family protein; FUNCTIONS IN: protein serine/threonine kinase activity, kinase activity, ATP binding; INVOLVED IN: transmembrane receptor protein tyrosine kinase signaling pathway, protein amino acid phosphorylation; LOCATED IN: plasma membrane; EXPRESSED IN: 22 plant structures; EXPRESSED DURING: 13 growth stages; CONTAINS InterPro DOMAIN/s: Protein kinase, ATP…	AT5G58300.2	1e-131	149.218	79.1729	219.264	1.46959	3.88908e-05	0.00310312	1.46959
comp107239	Arabidopsis-autoinhibited Ca2+ -ATPase, isoform 8, contains all of the characteristic motifs of Ca2+ -transporting P-type Ca2+ -ATPases and is localized to the plasma membrane.	AT5G57110.2	6e-92	101.864	52.7342	150.995	1.51769	0.000142101	0.0087172	1.51769	yes
comp107250	Aldolase superfamily protein; FUNCTIONS IN: fructose-bisphosphate aldolase activity; INVOLVED IN: response to oxidative stress, response to cadmium ion, pentose-phosphate shunt; LOCATED IN: mitochondrion, chloroplast, plastoglobule	AT2G01140.1	4e-81	159.249	221.687	96.8118	-1.19527	9.88483e-05	0.00655769	1.19527
comp107273	Encodes a pentatricopeptide (PPR) protein involved in leaf and root development. dot4 mutants have an aberrant midgap venation pattern in juvenile leaves and cotyledons.	AT4G18750.1	2e-77	147.605	77.1081	218.102	1.50005	8.03464e-05	0.00548077	1.50005
comp107291	Beige/BEACH domain ;WD domain, G-beta repeat protein; FUNCTIONS IN: binding; INVOLVED IN: signal transduction; LOCATED IN: chloroplast; EXPRESSED IN: 10 plant structures; EXPRESSED DURING: 6 growth stages; CONTAINS InterPro DOMAIN/s: WD40 repeat 2 (InterPro:IPR019782), Beige/BEACH (InterPro:IPR000409), WD40 repeat, conserved site (InterPro:IPR019775), WD40 repeat (InterPro:IPR001680), WD40 repeat…	AT4G02660.1	3e-14	1234.19	671.713	1796.67	1.41941	9.32431e-07	0.000142937	1.41941
comp107292	a member of a subfamily of Ser/Thr PKs in plants.	AT3G27580.2	5e-30	188.707	88.8621	288.552	1.69919	1.97758e-06	0.000266425	1.69919
comp107333	Transducin/WD40 repeat-like superfamily protein; FUNCTIONS IN: DNA binding; INVOLVED IN: regulation of transcription, DNA-dependent; LOCATED IN: CUL4 RING ubiquitin ligase complex; EXPRESSED IN: 22 plant structures; EXPRESSED DURING: 13 growth stages; CONTAINS InterPro DOMAIN/s: A.T hook-like (InterPro:IPR020478), AT hook, DNA-binding motif (InterPro:IPR017956), WD40 repeat (InterPro:IPR001680), …	AT1G19485.2	3e-87	295.918	173.628	418.207	1.26822	0.000119926	0.00761007	1.26822
comp107354				323.618	513.51	133.726	-1.94111	3.87001e-10	1.78367e-07	1.94111
comp107401	Encodes a plasma membrane-located ferric chelate reductase. Its mRNA is expressed in green aerial tissues (shoot, flower and cotyledon) in a light- and cell differentiation-specific manner.	AT5G49730.1	1e-80	38.5614	4.84021	72.2826	3.90051	3.55502e-06	0.000428658	3.90051
comp107442				304.324	150.51	458.138	1.60593	8.94519e-07	0.000138032	1.60593
comp107455				42.2811	17.1301	67.4321	1.9769	0.000144467	0.0088464	1.9769
comp107481				61.8482	102.021	21.6753	-2.23475	5.70412e-08	1.31884e-05	2.23475
comp107496				54.3606	15.6426	93.0786	2.57297	9.24804e-08	2.05026e-05	2.57297
comp107510	ATRX; FUNCTIONS IN: helicase activity, DNA binding, ATP binding, nucleic acid binding; EXPRESSED IN: 24 plant structures; EXPRESSED DURING: 15 growth stages; CONTAINS InterPro DOMAIN/s: DEAD-like helicase, N-terminal (InterPro:IPR014001), DNA/RNA helicase, C-terminal (InterPro:IPR001650), Helicase, superfamily 1/2, ATP-binding domain (InterPro:IPR014021), SNF2-related (InterPro:IPR000330); BEST A…	AT1G08600.2	0	826.839	472.509	1181.17	1.3218	9.72124e-06	0.000989871	1.3218
comp107616	Protein of unknown function (DUF3527); CONTAINS InterPro DOMAIN/s: Protein of unknown function DUF3527 (InterPro:IPR021916); BEST Arabidopsis thaliana protein match is: Protein of unknown function (DUF3527) (TAIR:AT5G59020.1); Has 3861 Blast hits to 705 proteins in 135 species: Archae - 0; Bacteria - 66; Metazoa - 411; Fungi - 77; Plants - 149; Viruses - 10; Other Eukaryotes - 3148 (source: NCBI …	AT2G29510.1	3e-13	214.606	64.205	365.008	2.50717	8.71028e-13	8.359e-10	2.50717
comp107631				591.144	330.667	851.621	1.36483	1.52636e-05	0.00141818	1.36483
comp107653	Vacuolar protein sorting-associated protein; INVOLVED IN: protein localization; LOCATED IN: mitochondrion; EXPRESSED IN: 22 plant structures; EXPRESSED DURING: 13 growth stages; CONTAINS InterPro DOMAIN/s: Vacuolar protein sorting-associated protein (InterPro:IPR009543); Has 365 Blast hits to 355 proteins in 118 species: Archae - 0; Bacteria - 0; Metazoa - 156; Fungi - 111; Plants - 61; Viruses -…	AT3G50380.1	2e-163	1230.57	661.509	1799.64	1.44388	1.92209e-05	0.00172855	1.44388
comp107661	Plant protein of unknown function (DUF639); FUNCTIONS IN: molecular_function unknown; INVOLVED IN: biological_process unknown; LOCATED IN: cellular_component unknown; CONTAINS InterPro DOMAIN/s: Protein of unknown function DUF639 (InterPro:IPR006927); BEST Arabidopsis thaliana protein match is: Plant protein of unknown function (DUF639) (TAIR:AT1G48840.1); Has 140 Blast hits to 137 proteins in 12…	AT1G71240.2	3e-178	259.081	145.33	372.832	1.35919	5.94328e-05	0.00435673	1.35919
comp107702				2990.76	5980.81	0.724377	-13.0113	1.36035e-55	4.76504e-51	13.0113
comp107730				278.029	407.465	148.592	-1.45532	2.72864e-06	0.000339535	1.45532
comp107788	Tetratricopeptide repeat (TPR)-like superfamily protein; CONTAINS InterPro DOMAIN/s: Pentatricopeptide repeat (InterPro:IPR002885); BEST Arabidopsis thaliana protein match is: Pentatricopeptide repeat (PPR) superfamily protein (TAIR:AT2G13600.1); Has 49646 Blast hits to 13771 proteins in 238 species: Archae - 0; Bacteria - 6; Metazoa - 50; Fungi - 74; Plants - 48928; Viruses - 0; Other Eukaryotes…	AT2G13600.1	2e-30	648.725	390.442	907.008	1.21601	6.77913e-05	0.00479716	1.21601
comp107804	alternative oxidase 1D (AOX1D); FUNCTIONS IN: alternative oxidase activity; INVOLVED IN: oxidation reduction, response to cyclopentenone; LOCATED IN: mitochondrial envelope, mitochondrion; EXPRESSED IN: stem, sepal, leaf, stamen; EXPRESSED DURING: LP.04 four leaves visible, 4 anthesis, petal differentiation and expansion stage; CONTAINS InterPro DOMAIN/s: Alternative oxidase (InterPro:IPR002680);…	AT1G32350.1	2e-23	256.613	147.615	365.611	1.30847	2.77557e-05	0.00235126	1.30847	yes
comp107841				12.2726	1.48345	23.0617	3.95847	3.84416e-05	0.00307819	3.95847
comp107883				133.392	33.7128	233.071	2.7894	6.70563e-14	7.70114e-11	2.7894
comp107897	GSL8, a member of the Glucan Synthase-Like (GSL) family believed to be involved in the synthesis of the cell wall component callose. GSL8 is required for male gametophyte development and plant growth. Has a role in entry of microspores into mitosis. Also refer to GSL10 (At3g07160).	AT2G36850.1	0	3297.69	1819.75	4775.64	1.39195	2.00314e-06	0.000269299	1.39195
comp107916				935.906	499.412	1372.4	1.4584	2.11328e-06	0.000280394	1.4584
comp107917	Protein kinase superfamily protein; FUNCTIONS IN: protein serine/threonine kinase activity, protein kinase activity, kinase activity, ATP binding; INVOLVED IN: protein amino acid phosphorylation; LOCATED IN: cytosol; EXPRESSED IN: 25 plant structures; EXPRESSED DURING: 15 growth stages; CONTAINS InterPro DOMAIN/s: Protein kinase, catalytic domain (InterPro:IPR000719), Serine/threonine-protein kin…	AT1G67580.2	0	4007.35	2454.5	5560.19	1.17971	5.94529e-05	0.00435673	1.17971
comp107918	IBM1 likely encodes a protein with histone H3mK9 demethylation activity. It may preferentially demethylate H3mK9 at low-copy loci to protect them from silencing by nearby heterochromatin by preventing the spread of cytosine methylation. BONSAI (At1g73177) is hypermethylated in ibm1 mutants. ibm1 mutants have morphological defects that become apparent at the F3 generation, including small narrow l…	AT3G07610.1	4e-21	4490.54	2538.52	6442.55	1.34364	5.61988e-06	0.000626921	1.34364
comp107983	A member of mei2-like gene family, predominantly plant-based family of genes encoding RNA binding proteins with characteristic presence of a highly conserved RNA binding motif first described in the mei2 gene of the fission yeast S. pombe. In silico analyses reveal nine mei2 -like genes in A. thaliana. They were grouped into four distinct clades, based on overall sequence similarity and subfamily…	AT5G61960.2	5e-19	1529.98	864.057	2195.91	1.34562	3.97273e-06	0.000470919	1.34562
comp107986	kinesin-like protein 1 (KP1); FUNCTIONS IN: microtubule motor activity, ATP binding; INVOLVED IN: microtubule-based movement; EXPRESSED IN: 23 plant structures; EXPRESSED DURING: 14 growth stages; CONTAINS InterPro DOMAIN/s: Calponin-homology (InterPro:IPR016146), Calponin-like actin-binding (InterPro:IPR001715), Kinesin, motor domain (InterPro:IPR001752); BEST Arabidopsis thaliana protein match …	AT3G44730.1	1e-163	1328.5	706.881	1950.13	1.46403	9.01962e-07	0.000138874	1.46403
comp108011	Subtilase family protein; FUNCTIONS IN: identical protein binding, serine-type endopeptidase activity; INVOLVED IN: proteolysis, negative regulation of catalytic activity; LOCATED IN: endomembrane system; EXPRESSED IN: 22 plant structures; EXPRESSED DURING: 13 growth stages; CONTAINS InterPro DOMAIN/s: Protease-associated PA (InterPro:IPR003137), Proteinase inhibitor, propeptide (InterPro:IPR0090…	AT3G14240.1	0	166.736	84.0926	249.379	1.56829	1.14429e-05	0.00111961	1.56829
comp108019				2744.48	1295.62	4193.33	1.69445	9.9024e-09	2.97735e-06	1.69445
comp108024	HAD-superfamily hydrolase, subfamily IG, 5'-nucleotidase; FUNCTIONS IN: 5'-nucleotidase activity; INVOLVED IN: biological_process unknown; LOCATED IN: chloroplast, chloroplast stroma; EXPRESSED IN: 23 plant structures; EXPRESSED DURING: 13 growth stages; CONTAINS InterPro DOMAIN/s: HAD-superfamily hydrolase, subfamily IG, 5'-nucleotidase (InterPro:IPR008380); BEST Arabidopsis thaliana protein mat…	AT5G48960.1	2e-34	154.211	74.209	234.213	1.65816	4.55934e-06	0.000532349	1.65816
comp108026	P-loop containing nucleoside triphosphate hydrolases superfamily protein; FUNCTIONS IN: microtubule motor activity, ATP binding; INVOLVED IN: microtubule-based movement; EXPRESSED IN: 15 plant structures; EXPRESSED DURING: 6 growth stages; CONTAINS InterPro DOMAIN/s: Kinesin, motor region, conserved site (InterPro:IPR019821), Kinesin, motor domain (InterPro:IPR001752); BEST Arabidopsis thaliana p…	AT3G10180.1	0	1084.13	582.569	1585.69	1.44461	1.8134e-06	0.000248245	1.44461
comp108045	U-box domain-containing protein kinase family protein; FUNCTIONS IN: ubiquitin-protein ligase activity, protein serine/threonine kinase activity, protein kinase activity, kinase activity, ATP binding; INVOLVED IN: protein amino acid phosphorylation, response to stress, protein ubiquitination; LOCATED IN: ubiquitin ligase complex; EXPRESSED IN: 22 plant structures; EXPRESSED DURING: 13 growth stag…	AT2G45910.1	1e-92	1142.61	493.025	1792.19	1.86199	1.42947e-10	7.36345e-08	1.86199
comp108049	TESMIN/TSO1-like CXC 2 (TCX2); FUNCTIONS IN: sequence-specific DNA binding transcription factor activity; INVOLVED IN: regulation of transcription; LOCATED IN: chloroplast; EXPRESSED IN: 16 plant structures; EXPRESSED DURING: 9 growth stages; CONTAINS InterPro DOMAIN/s: Tesmin/TSO1-like, CXC (InterPro:IPR005172); BEST Arabidopsis thaliana protein match is: Tesmin/TSO1-like CXC domain-containing p…	AT4G14770.1	3e-47	222.427	85.1178	359.736	2.07941	7.34175e-10	3.0984e-07	2.07941
comp108069	Sec14p-like phosphatidylinositol transfer family protein	AT1G14820.3	4e-28	692.524	948.101	436.946	-1.11758	0.000158683	0.00950142	1.11758
comp108092	Pentatricopeptide repeat (PPR) superfamily protein; CONTAINS InterPro DOMAIN/s: Pentatricopeptide repeat (InterPro:IPR002885); BEST Arabidopsis thaliana protein match is: Tetratricopeptide repeat (TPR)-like superfamily protein (TAIR:AT1G16480.1); Has 61118 Blast hits to 14026 proteins in 284 species: Archae - 2; Bacteria - 18; Metazoa - 154; Fungi - 167; Plants - 59907; Viruses - 0; Other Eukaryo…	AT4G13650.1	1e-125	242.567	103.668	381.466	1.87958	4.1451e-08	1.01535e-05	1.87958
comp108101	CASC3/Barentsz eIF4AIII binding; CONTAINS InterPro DOMAIN/s: CASC3/Barentsz eIF4AIII binding (InterPro:IPR018545); BEST Arabidopsis thaliana protein match is: CASC3/Barentsz eIF4AIII binding (TAIR:AT1G15280.2); Has 35333 Blast hits to 34131 proteins in 2444 species: Archae - 798; Bacteria - 22429; Metazoa - 974; Fungi - 991; Plants - 531; Viruses - 0; Other Eukaryotes - 9610 (source: NCBI BLink).	AT1G80000.2	4e-16	509.933	288.57	731.296	1.34154	9.16869e-06	0.000945982	1.34154
comp108120	Core-2/I-branching beta-1,6-N-acetylglucosaminyltransferase family protein; CONTAINS InterPro DOMAIN/s: Core-2/I-Branching enzyme (InterPro:IPR021141); BEST Arabidopsis thaliana protein match is: Core-2/I-branching beta-1,6-N-acetylglucosaminyltransferase family protein (TAIR:AT1G11940.1); Has 574 Blast hits to 572 proteins in 18 species: Archae - 0; Bacteria - 0; Metazoa - 0; Fungi - 0; Plants -…	AT5G14550.1	9e-120	1604.44	866.403	2342.48	1.43493	1.76382e-06	0.000244202	1.43493
comp108150				15.569	2.74915	28.3889	3.36827	3.9056e-05	0.00311083	3.36827
comp108174				203.009	94.9172	311.101	1.71264	1.91295e-07	3.89575e-05	1.71264
comp108230	unknown protein; BEST Arabidopsis thaliana protein match is: unknown protein (TAIR:AT4G29790.1); Has 203 Blast hits to 188 proteins in 60 species: Archae - 0; Bacteria - 11; Metazoa - 24; Fungi - 34; Plants - 93; Viruses - 0; Other Eukaryotes - 41 (source: NCBI BLink).	AT2G19390.1	4e-64	1505.22	685.255	2325.18	1.76263	5.93344e-09	1.93336e-06	1.76263
comp108236				62.5248	30.9907	94.059	1.60173	9.02465e-05	0.00608499	1.60173
comp108267	Heavy metal transport/detoxification superfamily protein	AT5G27690.1	5e-11	290.634	398.915	182.353	-1.12934	0.000154304	0.0092869	1.12934
comp108279				21.4904	5.73956	37.2412	2.69789	6.97286e-05	0.00490945	2.69789
comp108295	Encodes one of the 36 carboxylate clamp (CC)-tetratricopeptide repeat (TPR) proteins (Prasad 2010, Pubmed ID: 20856808) with potential to interact with Hsp90/Hsp70 as co-chaperones.	AT5G12430.1	4e-20	337.64	121.746	553.534	2.1848	5.02136e-12	3.99746e-09	2.1848	yes
comp108296	P-loop containing nucleoside triphosphate hydrolases superfamily protein; BEST Arabidopsis thaliana protein match is: P-loop containing nucleoside triphosphate hydrolases superfamily protein (TAIR:AT4G30100.1); Has 5930 Blast hits to 5690 proteins in 1157 species: Archae - 188; Bacteria - 1788; Metazoa - 1227; Fungi - 954; Plants - 650; Viruses - 225; Other Eukaryotes - 898 (source: NCBI BLink).	AT2G19120.1	0	1053.39	651.303	1455.49	1.1601	0.000164421	0.00977047	1.1601
comp108299	S-domain-2 5 (SD2-5); FUNCTIONS IN: carbohydrate binding, protein kinase activity, kinase activity; INVOLVED IN: protein amino acid autophosphorylation; LOCATED IN: plasma membrane; EXPRESSED IN: 25 plant structures; EXPRESSED DURING: 15 growth stages; CONTAINS InterPro DOMAIN/s: Curculin-like (mannose-binding) lectin (InterPro:IPR001480), Protein kinase, ATP binding site (InterPro:IPR017441), Pr…	AT4G32300.1	2e-37	257.525	144.215	370.836	1.36256	1.84298e-05	0.00166596	1.36256
comp108339	PPD2 (and its paralog, PPD1) encode plant-specific putative DNA-binding proteins. Deletion of the PPD locus increases leaf lamina size and results in dome-shaped rather than flat leaves. Siliques are also altered in shape because of extra lamina growth.	AT4G14720.1	6e-30	422.666	244.937	600.396	1.2935	5.25806e-05	0.00392706	1.2935
comp108407				13.8856	0.695403	27.0759	5.28302	1.55095e-06	0.000218618	5.28302
comp108422	DNA repair gene. gamma-radiation hypersensitive (RAD5) involved in stable transformation and T-DNA transfer	AT5G22750.1	0	2264.16	1144.53	3383.8	1.56389	1.50876e-07	3.15516e-05	1.56389
comp108426	UDP-glucosyl transferase 85A7 (UGT85A7); FUNCTIONS IN: UDP-glycosyltransferase activity, transferase activity, transferring glycosyl groups, glucuronosyltransferase activity; INVOLVED IN: metabolic process; LOCATED IN: cellular_component unknown; EXPRESSED IN: 8 plant structures; CONTAINS InterPro DOMAIN/s: UDP-glucuronosyl/UDP-glucosyltransferase (InterPro:IPR002213); BEST Arabidopsis thaliana p…	AT1G22340.1	1e-83	71.8328	31.1855	112.48	1.85072	1.0246e-05	0.00102689	1.85072
comp108428	WW domain-containing protein; CONTAINS InterPro DOMAIN/s: WW/Rsp5/WWP (InterPro:IPR001202); Has 4868 Blast hits to 3360 proteins in 446 species: Archae - 8; Bacteria - 476; Metazoa - 1490; Fungi - 707; Plants - 530; Viruses - 89; Other Eukaryotes - 1568 (source: NCBI BLink).	AT3G13225.1	1e-30	266.866	158.671	375.06	1.24108	0.000132347	0.0082196	1.24108
comp108460	member of Myosin-like proteins	AT1G54560.1	0	1119.82	615.825	1623.81	1.39879	2.32729e-06	0.000303049	1.39879
comp108491	AGO1 Encodes an RNA Slicer that selectively recruits microRNAs and siRNAs. There is currently no evidence that AGO1 Slicer is in a high molecular weight RNA-induced silencing complex (RISC). Mutants are defective in post-transcriptional gene silencing and have pleiotropic developmental and morphological defects. Through its action on the regulation of ARF17 expression, the protein regulates genes…	AT1G48410.1	0	2296.93	1316.1	3277.75	1.31644	8.60461e-06	0.000891723	1.31644
comp108494				21.4787	6.08241	36.8751	2.59993	0.000126865	0.00794654	2.59993
comp108507	microtubule-associated kinase-like protein RUNKEL (RUK). Contains a putative serine/threonine kinase domain and a microtubule-binding domain. RUK directly binds to microtubules in vitro and colocalizes with mitotic preprophase band, spindle, and phragmoplast in vivo. Required for cell plate expansion in cytokinesis.	AT5G18700.1	1e-49	554.79	322.132	787.449	1.28953	3.79254e-05	0.00304691	1.28953
comp108528				53.3575	21.0799	85.6351	2.02233	4.98777e-05	0.00377114	2.02233
comp108536	retrotransposon like protein		1e-146	87.7665	43.3138	132.219	1.61003	3.25e-05	0.0026908	1.61003
comp108565				266.849	139.838	393.86	1.49393	4.41043e-06	0.000519289	1.49393
comp108571	ubiquitin ligase that is a novel player in ethylene signaling involved in negatively regulating apical hook curvature, with alternative splicing controlling dual targeting to the nuclear and cytoplasmic compartments.	AT3G23280.2	8e-79	242.112	97.3682	386.855	1.99027	1.25781e-09	4.97837e-07	1.99027
comp108572	retrovirus-related pol polyprotein from transposon tnt 1-94		3.9e-20	280.095	111.786	448.404	2.00406	3.72673e-09	1.26738e-06	2.00406
comp108603	abscisic acid responsive element-binding factor 1	AT3G56850.1	4e-27	57.2881	87.2933	27.2829	-1.67788	0.000167957	0.00993782	1.67788
comp108620	MST; plasma membrane-localized polyol/cyclitol/monosaccharide-H+-symporter. The symporter is able to catalyze the energy-dependent membrane passage of a wide range of linear polyols (three to six carbon backbone), of cyclic polyols (<i>myo</i>-inositol), and of numerous monosaccharides, including pyranose ring-forming and furanose ring-forming hexoses and pentoses. This gene belongs to a monosacc…	AT3G18830.1	3e-149	254.602	137.258	371.945	1.4382	1.76248e-05	0.00159525	1.4382
comp108636				47.0882	79.6009	14.5755	-2.44923	2.41336e-07	4.73586e-05	2.44923
comp108638	Homologous to CREB-binding protein, a co-activator of transcription with histone acetyl-transferase activity. No single prior lysine acetylation is sufficient to block HAC1 acetylation of the H3 or H4 peptides, suggesting that HAC1, HAC5, and HAC12 can acetylate any of several lysines present in the peptides. HAM2 acetylates histone H4 lysine 5. A plant line expressing an RNAi construct targeted …	AT1G79000.1	0	485.923	278.768	693.077	1.31395	4.28604e-05	0.00334741	1.31395
comp108641				91.6959	21.4823	161.909	2.91396	5.47394e-10	2.4271e-07	2.91396
comp108643	unknown protein; FUNCTIONS IN: molecular_function unknown; INVOLVED IN: biological_process unknown; LOCATED IN: cellular_component unknown; EXPRESSED IN: 26 plant structures; EXPRESSED DURING: 15 growth stages; Has 27734 Blast hits to 16708 proteins in 1259 species: Archae - 81; Bacteria - 3434; Metazoa - 10876; Fungi - 2514; Plants - 987; Viruses - 212; Other Eukaryotes - 9630 (source: NCBI BLin…	AT3G50370.1	5e-13	627.403	348.486	906.32	1.37892	7.98795e-06	0.000830273	1.37892
comp108645	maternal effect embryo arrest 13 (MEE13); FUNCTIONS IN: molecular_function unknown; INVOLVED IN: embryo development ending in seed dormancy; LOCATED IN: cellular_component unknown; EXPRESSED IN: 24 plant structures; EXPRESSED DURING: 15 growth stages; Has 12137 Blast hits to 7799 proteins in 703 species: Archae - 154; Bacteria - 800; Metazoa - 7483; Fungi - 815; Plants - 597; Viruses - 3; Other E…	AT2G14680.2	3e-22	235.319	141.998	328.639	1.21063	0.000164884	0.00977265	1.21063
comp108684	PPR3; Pseudo response regulator involved in the generation of circadian rhythms. TOC1 appears to shorten the period of circumnutation speed. TOC1 contributes to the plant fitness (carbon fixation, biomass) by influencing the circadian clock period. PRR3 may increase the stability of TOC1 by preventing interactions between TOC1 and the F-box protein ZTL. Expression of TOC1 is correlated with rhyth…	AT5G61380.1	2e-45	347.594	475.865	219.323	-1.1175	7.75002e-05	0.00533335	1.1175
comp108686	P-glycoprotein 2 (PGP2); FUNCTIONS IN: ATPase activity, coupled to transmembrane movement of substances; INVOLVED IN: transport, transmembrane transport; LOCATED IN: membrane; EXPRESSED IN: 22 plant structures; EXPRESSED DURING: 13 growth stages; CONTAINS InterPro DOMAIN/s: ATPase, AAA+ type, core (InterPro:IPR003593), ABC transporter-like (InterPro:IPR003439), ABC transporter, transmembrane doma…	AT4G25960.1	0	158.137	57.047	259.228	2.184	2.41093e-09	8.79689e-07	2.184	yes
comp108719				36.3281	6.95825	65.6979	3.23905	3.56243e-09	1.21741e-06	3.23905
comp108763				19.0153	4.47871	33.5519	2.90524	5.78619e-05	0.00426244	2.90524
comp108790	unknown protein; Has 25732 Blast hits to 16979 proteins in 961 species: Archae - 144; Bacteria - 1801; Metazoa - 12681; Fungi - 1868; Plants - 912; Viruses - 94; Other Eukaryotes - 8232 (source: NCBI BLink).	AT3G15550.1	6e-17	238.909	135.784	342.035	1.33283	6.3107e-05	0.00456246	1.33283
comp108808				543.439	331.728	755.149	1.18676	0.00016137	0.00962124	1.18676
comp108826	nucleic acid binding;ATP-dependent helicases;ATP binding;helicases;ATP-dependent helicases; FUNCTIONS IN: helicase activity, ATP binding, ATP-dependent helicase activity, nucleic acid binding; LOCATED IN: cellular_component unknown; EXPRESSED IN: 14 plant structures; EXPRESSED DURING: 8 growth stages; CONTAINS InterPro DOMAIN/s: DNA/RNA helicase, DEAD/DEAH box type, N-terminal (InterPro:IPR011545…	AT5G08110.1	2e-61	245.663	139.069	352.257	1.34082	3.19792e-05	0.00265442	1.34082	yes
comp108842				28.9181	9.00714	48.8291	2.4386	1.04075e-05	0.00104009	2.4386
comp108874	member of plant transcription factor family that includes Teosinte branched 1, Cycloidea 1, and proliferating cell nuclear antigen (PCNA) factors, PCF1 and 2. Regulated by miR319. Involved in heterochronic regulation of leaf differentiation.	AT1G53230.1	2e-25	190.876	100.624	281.128	1.48225	1.22496e-05	0.00118041	1.48225
comp108908	pentatricopeptide repeat protein belonging to the E+ subclass of the P-L-S subfamily. It is localized to the mitochondrion, affects several RNA editing sites, and is required for carbon energy balance in Arabidopsis by maintaining the abundance and/or activity of complexes I, III and IV of the mitochondrial electron transport chain.	AT2G13600.1	1e-23	16.2182	1.7247	30.7117	4.15437	2.38323e-06	0.000307476	4.15437
comp108964	Peroxidase superfamily protein; FUNCTIONS IN: peroxidase activity, heme binding; INVOLVED IN: response to oxidative stress, oxidation reduction; LOCATED IN: cell wall, vacuole, membrane, plant-type cell wall; EXPRESSED IN: 23 plant structures; EXPRESSED DURING: 13 growth stages; CONTAINS InterPro DOMAIN/s: Haem peroxidase (InterPro:IPR010255), Plant peroxidase (InterPro:IPR000823), Peroxidases he…	AT1G71695.1	2e-22	50.6346	7.03287	94.2364	3.7441	5.80778e-12	4.4711e-09	3.7441
comp109001	KH domain-containing protein; FUNCTIONS IN: RNA binding, nucleic acid binding; EXPRESSED IN: 23 plant structures; EXPRESSED DURING: 14 growth stages; CONTAINS InterPro DOMAIN/s: K Homology, type 1, subgroup (InterPro:IPR018111), K Homology (InterPro:IPR004087), K Homology, type 1 (InterPro:IPR004088); BEST Arabidopsis thaliana protein match is: KH domain-containing protein (TAIR:AT1G33680.1); Has…	AT2G25970.1	8e-51	2841.55	1772.71	3910.39	1.14136	9.53175e-05	0.00636564	1.14136
comp109042	Encodes a subunit of the WAVE complex. The WAVE complex is required for activation of ARP2/3 complex which functions in actin microfilament nucleation and branching. Mutations cause defects in both the actin and microtubule cytoskeletons that result in aberrant epidermal cell expansion. itb1 mutants showed irregularities in trichome branch positioning and expansion. The SHD domain of this protein…	AT2G38440.1	1e-11	934.367	533.608	1335.13	1.32312	1.38856e-05	0.00131633	1.32312
comp109126	TPLATE, a cytokinesis protein targeted to the cell plate. Functions in vesicle-trafficking events required for site-specific cell wall modifications during pollen germination and for anchoring of the cell plate to the mother wall at the correct cortical position.	AT3G01780.1	0	1643.3	1032.31	2254.3	1.1268	0.000102318	0.00670534	1.1268
comp109145	P-type ATPase HMA5 is involved in Cu detoxification. hma5 mutant plants exhibit Cu hypersensitivity, which is especially dramatic in roots where HMA5 is mostly expressed.	AT1G63440.1	0	222.219	124.088	320.35	1.36828	7.16286e-05	0.00500799	1.36828
comp109154	Protein of unknown function (DUF3527); CONTAINS InterPro DOMAIN/s: Protein of unknown function DUF3527 (InterPro:IPR021916); BEST Arabidopsis thaliana protein match is: Protein of unknown function (DUF3527) (TAIR:AT2G29510.1); Has 1807 Blast hits to 1807 proteins in 277 species: Archae - 0; Bacteria - 0; Metazoa - 736; Fungi - 347; Plants - 385; Viruses - 0; Other Eukaryotes - 339 (source: NCBI B…	AT5G59020.1	1e-15	194.609	100.709	288.51	1.51844	1.07498e-05	0.00106519	1.51844
comp109161				23.0235	42.2872	3.75989	-3.49146	1.33953e-05	0.00127676	3.49146
comp109170				419.147	196.334	641.959	1.70917	7.75829e-08	1.74846e-05	1.70917
comp109191	aspartyl protease	AT1G03220.1	4e-56	73.5745	108.52	38.6293	-1.49019	0.000162958	0.00970766	1.49019
comp109200	retrotransposon unclassified		5.2e-14	29.3014	10.5376	48.0651	2.18944	0.000109216	0.00706483	2.18944
comp109231				42.5386	12.5817	72.4955	2.52657	4.22007e-07	7.54186e-05	2.52657
comp109308	Encodes an FtsH protease that is localized to the chloroplast. Mutations in this locus result in embryo lethality.	AT1G79560.1	0	2829.95	1771.02	3888.88	1.13477	0.000159296	0.0095219	1.13477
comp109348				620.8	259.108	982.492	1.92289	5.09409e-10	2.3024e-07	1.92289
comp109351	O-Glycosyl hydrolases family 17 protein; FUNCTIONS IN: cation binding, hydrolase activity, hydrolyzing O-glycosyl compounds, catalytic activity; INVOLVED IN: carbohydrate metabolic process; LOCATED IN: anchored to plasma membrane, plasma membrane, anchored to membrane; EXPRESSED IN: 24 plant structures; EXPRESSED DURING: 13 growth stages; CONTAINS InterPro DOMAIN/s: X8 (InterPro:IPR012946), Glyco…	AT5G58090.1	2e-125	302.505	178.927	426.082	1.25176	0.00014535	0.00888539	1.25176
comp109382	forkhead-associated domain-containing protein / FHA domain-containing protein; FUNCTIONS IN: hydrolase activity, acting on acid anhydrides, in phosphorus-containing anhydrides, phosphoric diester hydrolase activity, zinc ion binding, nucleic acid binding; INVOLVED IN: DNA repair; LOCATED IN: nucleus; EXPRESSED IN: sperm cell, seed; EXPRESSED DURING: F mature embryo stage; CONTAINS InterPro DOMAIN…	AT5G07400.1	2e-81	833.088	477.928	1188.25	1.31397	1.64724e-05	0.00151046	1.31397
comp109389	NTMC2T6.1; calcium-dependent lipid-binding domainl LOCATED IN: plasma membrane, vacuole; EXPRESSED IN: 23 plant structures; EXPRESSED DURING: 13 growth stages; CONTAINS InterPro DOMAIN/s: C2 membrane targeting protein (InterPro:IPR018029), C2 calcium/lipid-binding domain, CaLB (InterPro:IPR008973), C2 calcium-dependent membrane targeting (InterPro:IPR000008); BEST Arabidopsis thaliana protein mat…	AT1G53590.1	1e-124	145.336	77.0784	213.593	1.47047	6.3263e-05	0.00456897	1.47047
comp109390	Encodes the unique largest subunit of nuclear DNA-dependent RNA polymerase V; homologous to budding yeast RPB1 and the E. coli RNA polymerase beta prime subunit. Required for normal RNA-directed DNA methylation at non-CG methylation sites and transgene silencing.	AT2G40030.1	4e-18	206.585	89.8052	323.365	1.84829	1.18578e-07	2.56391e-05	1.84829
comp109409				55.9106	24.1216	87.6997	1.86225	0.000100379	0.00662164	1.86225	yes
comp109431	RING/FYVE/PHD zinc finger superfamily protein; FUNCTIONS IN: zinc ion binding; INVOLVED IN: biological_process unknown; LOCATED IN: cellular_component unknown; EXPRESSED IN: 24 plant structures; EXPRESSED DURING: 15 growth stages; CONTAINS InterPro DOMAIN/s: Zinc finger, PHD-type (InterPro:IPR001965), Zinc finger, FYVE/PHD-type (InterPro:IPR011011); BEST Arabidopsis thaliana protein match is: RIN…	AT3G02890.1	1e-12	526.753	247.3	806.205	1.70488	3.2308e-08	8.26048e-06	1.70488
comp109434	unknown; FUNCTIONS IN: molecular_function unknown; INVOLVED IN: biological_process unknown; EXPRESSED IN: 21 plant structures; EXPRESSED DURING: 13 growth stages; CONTAINS InterPro DOMAIN/s: Prefoldin (InterPro:IPR009053), Protein of unknown function DUF869, plant (InterPro:IPR008587); BEST Arabidopsis thaliana protein match is: Plant protein of unknown function (DUF869) (TAIR:AT1G19835.2).	AT1G47900.2	1e-65	68.1256	27.5461	108.705	1.9805	1.10762e-06	0.000164747	1.9805
comp109456				3984.42	1865.68	6103.15	1.70985	1.08261e-06	0.000161712	1.70985
comp109466				54.2148	91.2659	17.1637	-2.41071	4.40543e-08	1.05694e-05	2.41071
comp109469				36.7446	10.8162	62.673	2.53465	5.02818e-06	0.000571842	2.53465
comp109495	Encodes a SU(VAR)3-9 homolog, a methyltransferase involved in histone methylation. The protein was shown to bind to methylated cytosines of CG, CNG and CNN motifs but has a preference for the latter two. This is a member of a subfamily of SET proteins that shares a conserved SRA domain.	AT2G22740.1	2e-142	293.334	167.949	418.72	1.31796	0.000112471	0.00720228	1.31796
comp109503				666.369	353.513	979.226	1.46988	2.12597e-06	0.000280834	1.46988
comp109506				50.6949	85.7021	15.6877	-2.4497	2.86732e-05	0.00242307	2.4497
comp109512	Regulator of chromosome condensation (RCC1) family protein; CONTAINS InterPro DOMAIN/s: Regulator of chromosome condensation/beta-lactamase-inhibitor protein II (InterPro:IPR009091), Regulator of chromosome condensation, RCC1 (InterPro:IPR000408); BEST Arabidopsis thaliana protein match is: Regulator of chromosome condensation (RCC1) family protein (TAIR:AT3G53830.1); Has 20178 Blast hits to 6212…	AT3G55580.1	4e-31	359.529	180.183	538.876	1.58049	4.50474e-07	7.96929e-05	1.58049	yes
comp109518				253.27	124.333	382.207	1.62015	9.14084e-07	0.000140432	1.62015
comp109539	Protein kinase superfamily protein; FUNCTIONS IN: protein serine/threonine kinase activity, protein kinase activity, kinase activity, ATP binding; INVOLVED IN: protein amino acid phosphorylation; EXPRESSED IN: 22 plant structures; EXPRESSED DURING: 13 growth stages; CONTAINS InterPro DOMAIN/s: Protein kinase, ATP binding site (InterPro:IPR017441), Protein kinase, catalytic domain (InterPro:IPR000…	AT3G28690.3	4e-118	713.72	365.564	1061.88	1.53842	8.26925e-08	1.85083e-05	1.53842
comp109550	Acyl-CoA N-acyltransferase with RING/FYVE/PHD-type zinc finger domain; FUNCTIONS IN: DNA binding, zinc ion binding; INVOLVED IN: regulation of transcription, DNA-dependent; LOCATED IN: nucleus; EXPRESSED IN: 23 plant structures; EXPRESSED DURING: 15 growth stages; CONTAINS InterPro DOMAIN/s: Zinc finger, PHD-type, conserved site (InterPro:IPR019786), Zinc finger, PHD-type (InterPro:IPR001965), Zi…	AT1G43260.1	3e-12	2717.48	1614.02	3820.93	1.24326	2.56958e-05	0.00219798	1.24326
comp109592				91.2744	44.0982	138.45	1.65058	0.00011183	0.00717435	1.65058
comp109603	C2H2-type zinc finger family protein; FUNCTIONS IN: sequence-specific DNA binding transcription factor activity, zinc ion binding, nucleic acid binding; INVOLVED IN: regulation of transcription; LOCATED IN: intracellular; EXPRESSED IN: 20 plant structures; EXPRESSED DURING: 11 growth stages; CONTAINS InterPro DOMAIN/s: Zinc finger, C2H2-like (InterPro:IPR015880), Zinc finger, C2H2-type (InterPro:…	AT2G28200.1	4e-12	146.282	63.744	228.819	1.84385	1.64557e-07	3.42084e-05	1.84385
comp109632	ARABIDILLO-1 and its homolog, ARABIDILLO -2, are unique among Arabidopsis Arm-repeat proteins in having an F-box motif and fall into a phylogenetically distinct subgroup from other plant Arm-repeat proteins Similar to arm repeat protein in rice and armadillo/beta-catenin repeat family protein / F-box family protein in Dictyostelium. ARABIDILLO-1 promote lateral root development. Mutant plants for…	AT2G44900.1	0	2498.85	1392.96	3604.75	1.37175	2.53347e-06	0.000323287	1.37175	yes
comp109636	embryo defective 2410 (emb2410); FUNCTIONS IN: molecular_function unknown; INVOLVED IN: embryo development ending in seed dormancy; EXPRESSED IN: 23 plant structures; EXPRESSED DURING: 13 growth stages; CONTAINS InterPro DOMAIN/s: Protein of unknown function DUF490 (InterPro:IPR007452); Has 35333 Blast hits to 34131 proteins in 2444 species: Archae - 798; Bacteria - 22429; Metazoa - 974; Fungi - …	AT2G25660.1	6e-45	2370.25	968.48	3772.02	1.96154	2.9674e-11	1.73237e-08	1.96154
comp109646	Regulator of chromosome condensation (RCC1) family with FYVE zinc finger domain; FUNCTIONS IN: chromatin binding, zinc ion binding, Ran GTPase binding; EXPRESSED IN: 22 plant structures; EXPRESSED DURING: 13 growth stages; CONTAINS InterPro DOMAIN/s: Regulator of chromosome condensation, RCC1 (InterPro:IPR000408), Disease resistance/zinc finger/chromosome condensation-like region (InterPro:IPR013…	AT5G19420.1	0	665.759	406.397	925.121	1.18675	7.24563e-05	0.00505074	1.18675
comp109653	chromatin remodeling 4 (CHR4); FUNCTIONS IN: in 6 functions; INVOLVED IN: chromatin assembly or disassembly, regulation of transcription; LOCATED IN: chromatin, nucleus; EXPRESSED IN: 24 plant structures; EXPRESSED DURING: 11 growth stages; CONTAINS InterPro DOMAIN/s: Protein of unknown function DUF1087 (InterPro:IPR009463), Zinc finger, PHD-type, conserved site (InterPro:IPR019786), Zinc finger,…	AT5G44800.1	2e-71	554.918	240.254	869.582	1.85576	1.78382e-09	6.76887e-07	1.85576
comp109662	Encodes a SWI2/SNF2 chromatin remodeling protein belonging to the ISWI family. Involved in nuclear proliferation during megagametogenesis and cell expansion in the sporophyte. Constitutively expressed. RNAi induced loss of function in megagametogenesis results in female sterility.35S:RNAi plants have reduced stature.	AT3G06400.2	0	5654.08	3547.02	7761.14	1.12966	0.000112818	0.00721785	1.12966
comp109672	CCCH-type zinc finger protein with ARM repeat domain; CONTAINS InterPro DOMAIN/s: Zinc finger, CCCH-type (InterPro:IPR000571), Ankyrin repeat-containing domain (InterPro:IPR020683), Ankyrin repeat (InterPro:IPR002110); BEST Arabidopsis thaliana protein match is: CCCH-type zinc finger protein with ARM repeat domain (TAIR:AT5G12850.1); Has 5399 Blast hits to 3519 proteins in 384 species: Archae - 1…	AT2G41900.1	9e-105	61.5115	25.2704	97.7526	1.95169	1.88587e-05	0.00170034	1.95169
comp109696	D-arabinono-1,4-lactone oxidase family protein; FUNCTIONS IN: oxidoreductase activity, D-arabinono-1,4-lactone oxidase activity, FAD binding, catalytic activity; INVOLVED IN: oxidation reduction; LOCATED IN: membrane; EXPRESSED IN: inflorescence meristem, sperm cell, hypocotyl, flower; EXPRESSED DURING: petal differentiation and expansion stage; CONTAINS InterPro DOMAIN/s: D-arabinono-1,4-lactone…	AT2G46760.1	7e-144	179.27	82.4812	276.058	1.74283	7.45071e-06	0.000784913	1.74283
comp109704	Auxin related. Belongs to the family of ATP-binding cassette (ABC) transporters. Also known as AtMDR11 and PGP19. Possibly regulates auxin-dependent responses by influencing basipetal auxin transport in the root. Acts upstream of phyA in regulating hypocotyl elongation and gravitropic response. Exerts nonredundant, partially overlapping functions with the ABC transporter encoded by AtPGP1.	AT3G28860.1	0	3309.56	1166.38	5452.75	2.22495	5.76598e-15	7.4804e-12	2.22495
comp109722	unknown protein; BEST Arabidopsis thaliana protein match is: unknown protein (TAIR:AT3G24150.1); Has 39 Blast hits to 39 proteins in 10 species: Archae - 0; Bacteria - 0; Metazoa - 0; Fungi - 0; Plants - 39; Viruses - 0; Other Eukaryotes - 0 (source: NCBI BLink).	AT4G32295.1	7e-57	111.693	55.6181	167.767	1.59283	4.27378e-05	0.00334156	1.59283
comp109771	COP1-interacting protein-related; EXPRESSED IN: 21 plant structures; EXPRESSED DURING: 13 growth stages; BEST Arabidopsis thaliana protein match is: COP1-interacting protein 7 (TAIR:AT4G27430.2).	AT5G43310.3	3e-42	1973.32	1122.03	2824.61	1.33194	7.45037e-06	0.000784913	1.33194
comp109778	Protein kinase superfamily protein with octicosapeptide/Phox/Bem1p domain; FUNCTIONS IN: protein serine/threonine/tyrosine kinase activity, protein kinase activity; INVOLVED IN: protein amino acid phosphorylation; LOCATED IN: cytosol; EXPRESSED IN: male gametophyte, pollen tube; EXPRESSED DURING: L mature pollen stage, M germinated pollen stage; CONTAINS InterPro DOMAIN/s: Octicosapeptide/Phox/Be…	AT1G79570.1	3e-127	6624.65	3635.35	9613.95	1.40304	1.70511e-06	0.000237481	1.40304
comp109809	ATRNS1 | ribonuclease 1	AT2G02990.1	6e-19	34.5261	60.1826	8.86951	-2.76242	8.90188e-08	1.97978e-05	2.76242
comp109814				879.735	1316.77	442.7	-1.5726	7.57659e-06	0.000795512	1.5726
comp109822	xyloglucan endotransglucosylase/hydrolase 16 (XTH16); FUNCTIONS IN: hydrolase activity, acting on glycosyl bonds, hydrolase activity, hydrolyzing O-glycosyl compounds, xyloglucan:xyloglucosyl transferase activity; INVOLVED IN: carbohydrate metabolic process, cellular glucan metabolic process; LOCATED IN: endomembrane system, cell wall, apoplast; EXPRESSED IN: 22 plant structures; EXPRESSED DURING…	AT3G23730.1	3e-73	88.5878	139.869	37.3062	-1.90659	6.53291e-07	0.000106932	1.90659	yes
comp109841	Related to TOR proteins from yeast and mammals, regulators of cell growth in response to nutrient availability. TOR proteins belong to the family of phosphatidylinositol 3-kinase and are targets of the antiproliferative drug rapamycin. AtTOR binds the yeast FKBP12 protein in the presence of Rapamycin, is involved in embryogenesis and is expressed in embryos, endosperm and meristems.	AT1G50030.1	3e-63	718.284	384.843	1051.73	1.45042	2.06692e-06	0.000275204	1.45042
comp109842	Encodes PROTEOLYSIS6 (PRT6), a component of the N-end rule pathway that targets protein degradation through the identity of the amino-terminal residue of specific protein substrates. Another component of the N-end rule pathway is arginyl-tRNA:protein arginyltransferase (ATE). Arabidopsis contains two ATE genes: At5g05700/ATE1, At3g11240/ATE2. PRT6 and ATE were shown to regulate seed after-ripenin…	AT5G02310.1	1e-26	1881.82	988.444	2775.2	1.48936	2.85277e-07	5.40145e-05	1.48936
comp109843				35.1791	64.2059	6.15225	-3.38352	7.59639e-05	0.00524308	3.38352
comp109848	chloroplast beta-amylase. The enzyme activity is very weak compared to BAM1 and BAM3. Mutant of BAM2 has no visible phenotype.	AT4G00490.1	0	3017.33	1666.92	4367.73	1.38969	3.80153e-07	6.89948e-05	1.38969
comp109858	histidine kinase, a cytokinin receptor that controls cytokinin-mediated leaf longevity through a specific phosphorylation of the response regulator, ARR2.	AT1G27320.1	7e-49	274.405	147.129	401.682	1.44898	1.21345e-05	0.00117417	1.44898
comp109865	RING/U-box superfamily protein; FUNCTIONS IN: zinc ion binding; EXPRESSED IN: 23 plant structures; EXPRESSED DURING: 13 growth stages; CONTAINS InterPro DOMAIN/s: Zinc finger, RING-type, conserved site (InterPro:IPR017907), Zinc finger, RING-type (InterPro:IPR001841); BEST Arabidopsis thaliana protein match is: RING/U-box superfamily protein (TAIR:AT5G58787.1); Has 1132 Blast hits to 1132 protein…	AT3G47160.1	5e-68	73.4554	120.887	26.0238	-2.21576	5.11129e-09	1.67325e-06	2.21576
comp109877				15.3853	1.5021	29.2685	4.28429	4.54362e-06	0.000531399	4.28429
comp109884				17.8698	3.55585	32.1838	3.17807	3.14699e-05	0.00261525	3.17807
comp109907	CONTAINS InterPro DOMAIN/s: Ribosome 60S biogenesis N-terminal (InterPro:IPR021714); BEST Arabidopsis thaliana protein match is: unknown protein (TAIR:AT4G27010.1); Has 772 Blast hits to 657 proteins in 120 species: Archae - 0; Bacteria - 0; Metazoa - 344; Fungi - 94; Plants - 322; Viruses - 0; Other Eukaryotes - 12 (source: NCBI BLink).	AT1G72270.1	4e-61	560.567	342.088	779.045	1.18734	0.000139887	0.00860394	1.18734
comp109933	Encodes a homolog of trithorax, a histone-lysine N-methyltransferase. Paralog of ATX1. Unlike ATX1 which is involved in trimethylating of histone H3-mysine 4, ATX2 is involved in dimethylating of histone H3-lysine 4. ATX1 and ATX2 influence the expression of largely nonoverlapping gene sets. The expression pattern of ATX2 is also different from that of ATX1.	AT1G05830.2	1e-12	833.927	418.004	1249.85	1.58016	8.78914e-07	0.000135923	1.58016
comp110012	unknown protein; FUNCTIONS IN: molecular_function unknown; INVOLVED IN: biological_process unknown; LOCATED IN: plasma membrane; EXPRESSED IN: 22 plant structures; EXPRESSED DURING: 13 growth stages; BEST Arabidopsis thaliana protein match is: unknown protein (TAIR:AT2G40070.1); Has 9215 Blast hits to 5316 proteins in 473 species: Archae - 6; Bacteria - 773; Metazoa - 3392; Fungi - 1710; Plants -…	AT1G27850.1	3e-12	382.192	199.846	564.538	1.49818	3.4201e-06	0.000415969	1.49818
comp110081	kinesin-like protein 1 (KP1); FUNCTIONS IN: microtubule motor activity, ATP binding; INVOLVED IN: microtubule-based movement; EXPRESSED IN: 23 plant structures; EXPRESSED DURING: 14 growth stages; CONTAINS InterPro DOMAIN/s: Calponin-homology (InterPro:IPR016146), Calponin-like actin-binding (InterPro:IPR001715), Kinesin, motor domain (InterPro:IPR001752); BEST Arabidopsis thaliana protein match …	AT3G44730.1	0	162.55	80.1704	244.93	1.61123	6.61084e-06	0.00071363	1.61123
comp110094	aldehyde dehydrogenase AtALDH1a mRNA. a sinapaldehyde dehydrogenase catalyzes both the oxidation of coniferylaldehyde and sinapaldehyde forming ferulic acid and sinapic acid, respectively	AT3G24503.1	7e-15	240.096	142.804	337.388	1.24037	7.06045e-05	0.00496115	1.24037
comp110105	RING-H2 zinc finger protein ATL6 (ATL6).	AT3G05200.1	5e-29	423.125	173.605	672.646	1.95404	1.68509e-11	1.07319e-08	1.95404
comp110109	PRP2 protein, one of four related DEAH RNA helicases identified as essential cofactors for RNA splicing.	AT1G32490.2	0	1127.08	614.852	1639.3	1.41477	2.1676e-06	0.000283839	1.41477
comp110124				17.8725	4.14481	31.6002	2.93056	0.000127632	0.00798336	2.93056
comp110129				16.7373	3.56071	29.9139	3.07058	7.89398e-05	0.00541116	3.07058
comp110132	ACT-domain containing protein involved in feedback regulation of amino acid metabolism	AT1G69040.2	1e-31	61.5465	96.8327	26.2602	-1.88261	1.62409e-05	0.00149314	1.88261
comp110134	receptor-like kinase that, together with ER and ERL2 governs the initial decision of protodermal cells to either divide proliferatively to produce pavement cells or divide asymmetrically to generate stomatal complexes. It is important for maintaining stomatal stem cell activity and preventing terminal differentiation of the meristemoid into the guard mother cell. Along with erl2 functionally comp…	AT5G62230.2	2e-173	110.178	50.8754	169.482	1.73609	6.70577e-06	0.000720521	1.73609
comp110136	hypothetical protein	ATMG00860.1	5e-16	30.3845	5.4845	55.2845	3.33344	2.03609e-08	5.63797e-06	3.33344
comp110160	Tudor/PWWP/MBT superfamily protein; CONTAINS InterPro DOMAIN/s: PWWP (InterPro:IPR000313); BEST Arabidopsis thaliana protein match is: Tudor/PWWP/MBT superfamily protein (TAIR:AT3G05430.1); Has 6717 Blast hits to 4764 proteins in 372 species: Archae - 18; Bacteria - 431; Metazoa - 2974; Fungi - 702; Plants - 445; Viruses - 136; Other Eukaryotes - 2011 (source: NCBI BLink).Recent studies indicate …	AT5G27650.1	3e-25	1025.7	486.974	1564.43	1.68372	3.00145e-08	7.78776e-06	1.68372
comp110172	ATP-binding cassette (ABC) transporter. Expressed in the vascular tissue of primary stem.	AT3G28345.1	0	84.0893	18.8451	149.334	2.98627	4.84137e-12	3.89847e-09	2.98627
comp110177	Regulator of Vps4 activity in the MVB pathway protein; CONTAINS InterPro DOMAIN/s: Protein of unknown function DUF292, eukaryotic (InterPro:IPR005061); BEST Arabidopsis thaliana protein match is: Regulator of Vps4 activity in the MVB pathway protein (TAIR:AT1G34220.2); Has 794 Blast hits to 754 proteins in 186 species: Archae - 0; Bacteria - 4; Metazoa - 200; Fungi - 205; Plants - 312; Viruses - …	AT4G35730.1	9e-30	191.893	110.711	273.075	1.3025	0.000134449	0.00832063	1.3025
comp110215	RPL5 | ribosomal protein L5	ATMG00210.1	2e-11	155.351	276.422	34.2796	-3.01145	4.2772e-07	7.62452e-05	3.01145
comp110217				117.318	232.627	2.00791	-6.85618	1.62693e-30	1.89961e-26	6.85618
comp110237				18.2451	4.25126	32.2389	2.92284	0.000111627	0.00716783	2.92284
comp110250				91.6047	10.7187	172.491	4.00832	2.30335e-18	5.56427e-15	4.00832
comp110252	Encodes FANCM, a highly conserved helicase that functions as a major factor limiting meiotic crossover formation.	AT1G35530.2	1e-26	437.361	216.123	658.599	1.60754	5.32214e-07	9.0038e-05	1.60754
comp110260	Encodes a homolog of Drosophila MUS308 and mammalian DNA polymerase, which prevent spontaneous or DNA damage-induced production of DNA double strand breaks. Two conserved functional domains: an N-terminal superfamily II DNA/RNA helicase domain and a C-terminal prokaryotic-type DNA polymerase I domain. Required for regulated cell division and differentiation in meristems. Mutant plants show morpho…	AT4G32700.2	0	844.475	377.273	1311.68	1.79773	4.32976e-09	1.43756e-06	1.79773
comp110278	DNA topoisomerase, type IA, core; FUNCTIONS IN: DNA topoisomerase activity, DNA topoisomerase type I activity, DNA binding, nucleic acid binding; INVOLVED IN: DNA topological change, DNA unwinding involved in replication, DNA metabolic process; LOCATED IN: chromosome; EXPRESSED IN: 22 plant structures; EXPRESSED DURING: 14 growth stages; CONTAINS InterPro DOMAIN/s: DNA topoisomerase, type IA, zn …	AT4G31210.1	2e-148	1285.57	755.301	1815.84	1.26551	6.94331e-05	0.00489357	1.26551
comp110283	ABC-2 type transporter family protein; FUNCTIONS IN: ATPase activity, coupled to transmembrane movement of substances; INVOLVED IN: response to karrikin; LOCATED IN: membrane; EXPRESSED IN: 7 plant structures; EXPRESSED DURING: 6 growth stages; CONTAINS InterPro DOMAIN/s: ATPase, AAA+ type, core (InterPro:IPR003593), ABC transporter-like (InterPro:IPR003439), ABC-2 type transporter (InterPro:IPR0…	AT3G21090.1	7e-13	84.7323	34.2167	135.248	1.98283	4.6229e-07	8.05626e-05	1.98283	yes
comp110288	Protein kinase superfamily protein; FUNCTIONS IN: kinase activity; INVOLVED IN: protein amino acid phosphorylation; LOCATED IN: cellular_component unknown; EXPRESSED IN: 21 plant structures; EXPRESSED DURING: 11 growth stages; CONTAINS InterPro DOMAIN/s: Protein kinase, ATP binding site (InterPro:IPR017441), Protein kinase, catalytic domain (InterPro:IPR000719), EGF-like (InterPro:IPR006210), Ser…	AT2G23450.1	8e-114	345.6	152.858	538.342	1.81633	4.28868e-08	1.04322e-05	1.81633
comp110300				18.605	2.87911	34.3309	3.57581	5.95153e-06	0.000659716	3.57581
comp110316	IDM1 is a histone H3 acetyltransferase that is capable of recognizing methylated DNA through its MBD domain and recognizing unmethylated histone H3K4 through its PHD domain. It negatively regulates DNA demethylation, preventing DNA hypermethylation of highly homologous multicopy genes and other repetitive sequences.	AT3G14980.1	1e-111	1860.42	935.142	2785.7	1.57478	4.09823e-07	7.37331e-05	1.57478	yes
comp110343				20.6143	3.56966	37.659	3.39914	6.21311e-06	0.000681167	3.39914
comp110347	PHRAGMOPLAST ORIENTING KINESIN 1 is one of the two Arabidopsis homologs isolated in yeast two-hybrid screen for interaction partners of maize gene TANGLED1 (TAN1). Based on sequence homology in their motor domains, POK1 and POK2 belong to the kinesin-12 class which also includes the well-characterized group of phragmoplast-associated kinesins AtPAKRPs. Both kinesins are composed of an N-terminal …	AT3G17360.1	2e-163	1524.48	838.436	2210.53	1.39862	2.59825e-06	0.00032797	1.39862
comp110365				569.875	244.978	894.771	1.86887	1.91629e-09	7.17903e-07	1.86887
comp110382	ATPases;nucleotide binding;ATP binding;nucleoside-triphosphatases;transcription factor binding; FUNCTIONS IN: nucleoside-triphosphatase activity, ATPase activity, transcription factor binding, nucleotide binding, ATP binding; INVOLVED IN: regulation of transcription, DNA-dependent, regulation of protein complex assembly; LOCATED IN: chloroplast envelope; EXPRESSED IN: 23 plant structures; EXPRESS…	AT1G67120.1	0	1396.18	748.28	2044.09	1.44981	4.56872e-05	0.00350566	1.44981
comp110386				25.8054	8.59516	43.0156	2.32326	0.000124032	0.00781399	2.32326
comp110442	pentatricopeptide repeat protein belonging to the E+ subclass of the P-L-S subfamily. It is localized to the mitochondrion, affects several RNA editing sites, and is required for carbon energy balance in Arabidopsis by maintaining the abundance and/or activity of complexes I, III and IV of the mitochondrial electron transport chain.	AT2G13600.1	4e-36	179.042	53.091	304.993	2.52224	3.59168e-13	3.7555e-10	2.52224
comp110461	CONTAINS InterPro DOMAIN/s: Putative zinc-finger domain (InterPro:IPR019607); Has 249 Blast hits to 219 proteins in 85 species: Archae - 0; Bacteria - 144; Metazoa - 29; Fungi - 8; Plants - 50; Viruses - 0; Other Eukaryotes - 18 (source: NCBI BLink).	AT2G39580.1	1e-23	708.108	357.002	1059.21	1.56899	3.17702e-07	5.9037e-05	1.56899
comp110462	binding; FUNCTIONS IN: binding; INVOLVED IN: signal transduction; LOCATED IN: mitochondrion; EXPRESSED IN: 23 plant structures; EXPRESSED DURING: 13 growth stages; CONTAINS InterPro DOMAIN/s: WD40 repeat 2 (InterPro:IPR019782), Beige/BEACH (InterPro:IPR000409), WD40 repeat, conserved site (InterPro:IPR019775), WD40 repeat (InterPro:IPR001680), WD40 repeat-like-containing domain (InterPro:IPR01104…	AT1G58230.1	1e-106	682.724	310.569	1054.88	1.76409	1.00121e-08	2.99748e-06	1.76409
comp110465	RECQ helicase l1 (RECQI1); FUNCTIONS IN: helicase activity, nucleic acid binding, ATP-dependent helicase activity, ATP binding; INVOLVED IN: DNA recombination; LOCATED IN: cellular_component unknown; EXPRESSED IN: 9 plant structures; EXPRESSED DURING: 6 growth stages; CONTAINS InterPro DOMAIN/s: DNA/RNA helicase, DEAD/DEAH box type, N-terminal (InterPro:IPR011545), DNA helicase, ATP-dependent, Re…	AT3G05740.1	0	555.093	290.965	819.221	1.49341	4.8593e-07	8.40551e-05	1.49341
comp110474	Clathrin, heavy chain; FUNCTIONS IN: structural molecule activity, binding; INVOLVED IN: intracellular protein transport, vesicle-mediated transport; LOCATED IN: plasma membrane, vacuole; EXPRESSED IN: male gametophyte, guard cell, cultured cell, pollen tube; EXPRESSED DURING: L mature pollen stage, M germinated pollen stage; CONTAINS InterPro DOMAIN/s: Clathrin, heavy chain (InterPro:IPR016341),…	AT3G11130.1	0	8793.51	5421.45	12165.6	1.16606	5.14115e-05	0.00385207	1.16606	yes
comp110480				57.12	11.7155	102.524	3.12948	1.05446e-10	5.55425e-08	3.12948
comp110488				36.6255	12.7718	60.4792	2.24348	4.91215e-06	0.000563217	2.24348
comp110493				166.775	242.053	91.4981	-1.40351	0.000155374	0.00933524	1.40351
comp110495	WD-40 repeat family protein / beige-related; FUNCTIONS IN: nucleotide binding; INVOLVED IN: biological_process unknown; LOCATED IN: cellular_component unknown; EXPRESSED IN: 25 plant structures; EXPRESSED DURING: 14 growth stages; CONTAINS InterPro DOMAIN/s: WD40 repeat 2 (InterPro:IPR019782), WD40 repeat-like-containing domain (InterPro:IPR011046), Beige/BEACH (InterPro:IPR000409), WD40-repeat-c…	AT2G45540.1	4e-136	611.939	298.585	925.292	1.63177	1.35949e-07	2.87735e-05	1.63177
comp110496	ABC-2 type transporter family protein; FUNCTIONS IN: ATPase activity, coupled to transmembrane movement of substances; INVOLVED IN: response to karrikin; LOCATED IN: membrane; EXPRESSED IN: 7 plant structures; EXPRESSED DURING: 6 growth stages; CONTAINS InterPro DOMAIN/s: ATPase, AAA+ type, core (InterPro:IPR003593), ABC transporter-like (InterPro:IPR003439), ABC-2 type transporter (InterPro:IPR0…	AT3G21090.1	1e-19	306.557	31.6861	581.427	4.19768	6.1326e-34	1.43208e-29	4.19768	yes
comp110498	Zincin-like metalloproteases family protein; FUNCTIONS IN: metalloendopeptidase activity; INVOLVED IN: proteolysis; LOCATED IN: chloroplast thylakoid membrane, chloroplast; CONTAINS InterPro DOMAIN/s: Peptidase M3A/M3B, thimet/oligopeptidase F (InterPro:IPR001567); BEST Arabidopsis thaliana protein match is: Zincin-like metalloproteases family protein (TAIR:AT1G67690.1); Has 5499 Blast hits to 54…	AT5G51540.1	0	1351.75	839.309	1864.19	1.15127	0.000107401	0.00697969	1.15127
comp110506	IQ-domain 6 (IQD6); CONTAINS InterPro DOMAIN/s: IQ calmodulin-binding region (InterPro:IPR000048); BEST Arabidopsis thaliana protein match is: IQ-domain 8 (TAIR:AT1G72670.1); Has 885 Blast hits to 872 proteins in 51 species: Archae - 0; Bacteria - 0; Metazoa - 22; Fungi - 10; Plants - 828; Viruses - 0; Other Eukaryotes - 25 (source: NCBI BLink).	AT2G26180.1	4e-24	90.9705	40.6669	141.274	1.79657	9.5171e-06	0.000974752	1.79657
comp110522	Chaperone DnaJ-domain superfamily protein; FUNCTIONS IN: unfolded protein binding, heat shock protein binding; INVOLVED IN: protein folding; EXPRESSED IN: 23 plant structures; EXPRESSED DURING: 13 growth stages; CONTAINS InterPro DOMAIN/s: Molecular chaperone, heat shock protein, Hsp40, DnaJ (InterPro:IPR015609), Heat shock protein DnaJ, N-terminal (InterPro:IPR001623), Heat shock protein DnaJ (I…	AT3G13310.1	1e-11	33.2164	55.5187	10.9141	-2.34678	1.09654e-05	0.0010759	2.34678
comp110523	Dicer-like 1	AT1G01040.2	0	372.855	191.196	554.514	1.53617	1.09101e-06	0.000162621	1.53617	yes
comp110561				17.6385	3.6623	31.6147	3.10977	3.67729e-05	0.00298167	3.10977
comp110566				802.225	450.528	1153.92	1.35686	2.01542e-05	0.00179405	1.35686
comp110575	allene oxide cyclase 2	AT3G25770.1	5e-42	22.9018	40.0669	5.73664	-2.80413	1.09183e-05	0.00107494	2.80413
comp110578	transposable element			14.0556	0.806702	27.3045	5.08096	1.37507e-06	0.000197402	5.08096
comp110583				64.7993	121.354	8.24471	-3.87961	6.16404e-06	0.000677908	3.87961
comp110587	unknown protein	AT4G19950.1	4e-22	40.3701	73.6526	7.08748	-3.37739	5.01826e-05	0.00378427	3.37739
comp110602				599.747	318.905	880.589	1.46534	7.29409e-05	0.00507442	1.46534
comp110640	OTP87 appears to act as a trans-factor involved in the recognition of the two editing sites in mitochondrial genes nad7-C24 and atp1-C1178.	AT1G74600.1	1e-95	291.204	160.032	422.377	1.40017	3.6163e-05	0.00294585	1.40017
comp110663	homeodomain protein that is expressed in the LI layer of the vegetative, floral and inflorescence meristems. Binds to the L1 box promoter element which is required in some proteins for L1 specific expression.	AT4G04890.1	0	472.187	240.664	703.71	1.54796	7.65205e-06	0.000801303	1.54796
comp110665	disease resistance protein (TIR-NBS-LRR class); FUNCTIONS IN: transmembrane receptor activity, nucleoside-triphosphatase activity, nucleotide binding, ATP binding; INVOLVED IN: signal transduction, defense response, apoptosis, innate immune response; LOCATED IN: intrinsic to membrane, endomembrane system; EXPRESSED IN: 21 plant structures; EXPRESSED DURING: 13 growth stages; CONTAINS InterPro DOM…	AT1G69550.1	4e-35	1573.66	937.259	2210.05	1.23756	1.62387e-05	0.00149314	1.23756	yes
comp110691	disease resistance protein (TIR-NBS-LRR class), putative; FUNCTIONS IN: transmembrane receptor activity, ATP binding; INVOLVED IN: signal transduction, apoptosis, defense response, innate immune response; LOCATED IN: intrinsic to membrane; CONTAINS InterPro DOMAIN/s: NB-ARC (InterPro:IPR002182), Leucine-rich repeat, typical subtype (InterPro:IPR003591), Disease resistance protein (InterPro:IPR000…	AT1G27180.1	3e-38	769.65	456.378	1082.92	1.24663	6.71118e-05	0.00476518	1.24663
comp110703	CYP76C2 cytochrome P450 monooxygenase	AT2G45560.1	7e-87	106.088	210.342	1.83321	-6.84223	3.69338e-33	5.87854e-29	6.84223
comp110715	glycosyltransferase family protein 2; BEST Arabidopsis thaliana protein match is: unknown protein (TAIR:AT5G12260.1); Has 216 Blast hits to 215 proteins in 74 species: Archae - 0; Bacteria - 15; Metazoa - 2; Fungi - 65; Plants - 77; Viruses - 0; Other Eukaryotes - 57 (source: NCBI BLink).	AT5G60700.1	0	88.2844	39.4157	137.153	1.79894	1.11014e-05	0.00108772	1.79894	yes
comp110733				180.806	96.4102	265.201	1.45983	2.35876e-05	0.00204765	1.45983
comp110742				104.995	159.4	50.5893	-1.65575	2.37867e-06	0.000307476	1.65575
comp110750	haloacid dehalogenase-like hydrolase family protein; FUNCTIONS IN: hydrolase activity, oxidoreductase activity, catalytic activity; INVOLVED IN: metabolic process, cell redox homeostasis; LOCATED IN: chloroplast, chloroplast stroma; EXPRESSED IN: 23 plant structures; EXPRESSED DURING: 14 growth stages; CONTAINS InterPro DOMAIN/s: Haloacid dehydrogenase/epoxide hydrolase (InterPro:IPR005833), Low-…	AT1G56500.1	6e-39	1053.51	591.122	1515.9	1.35865	6.61216e-06	0.00071363	1.35865
comp110753				218.029	126.454	309.604	1.29181	0.000147917	0.00897385	1.29181
comp110778	unknown FUNCTIONS IN: molecular_function unknown; INVOLVED IN: biological_process unknown; LOCATED IN: cellular_component unknown; BEST Arabidopsis thaliana protein match is: COP1-interacting protein-related (TAIR:AT1G72410.1); Has 30201 Blast hits to 17322 proteins in 780 species: Archae - 12; Bacteria - 1396; Metazoa - 17338; Fungi - 3422; Plants - 5037; Viruses - 0; Other Eukaryotes - 2996 (so…	AT3G14172.1	5e-42	331.028	184.768	477.289	1.36915	2.52907e-05	0.00217394	1.36915
comp110817	bacterial contamination			3405.46	6810.68	0.240905	-14.787	1.87393e-165	1.3128e-160	14.787
comp110823	Flavonoid 3'-monooxygenase	AT5G07990.1	3e-115	206.322	126.625	286.019	1.17555	3.98061e-05	0.00316174	1.17555
comp110837				70.7409	123.785	17.6967	-2.80628	4.1047e-07	7.37331e-05	2.80628	yes
comp110839				278.681	157.911	399.451	1.33891	5.98771e-05	0.00438323	1.33891
comp110842	Leucine-rich receptor-like protein kinase family protein; FUNCTIONS IN: protein serine/threonine kinase activity, kinase activity, ATP binding; INVOLVED IN: transmembrane receptor protein tyrosine kinase signaling pathway, protein amino acid phosphorylation; LOCATED IN: plasma membrane; EXPRESSED IN: 21 plant structures; EXPRESSED DURING: 13 growth stages; CONTAINS InterPro DOMAIN/s: Protein kina…	AT4G36180.1	3e-23	387.885	206.35	569.421	1.4644	7.10075e-06	0.000756003	1.4644
comp110845				1980.87	764.032	3197.7	2.06533	2.81705e-12	2.37773e-09	2.06533	yes
comp110847	SLAC1 Encodes a membrane protein with 10 predicted transmembrane helices. SLAC1 is a multispanning membrane protein expressed predominantly in guard cells that plays a role in regulating cellular ion homeostasis and S-type anion currents. SLAC1 is important for normal stomatal closure in response to a variety of signals including elevated CO2, ozone, ABA, darkness, and humidity. SLAC1:GFP localiz…	AT1G12480.1	3e-99	762.877	435.696	1090.06	1.32301	4.71723e-06	0.000548043	1.32301
comp110875				764.005	304.798	1223.21	2.00475	3.58207e-11	2.05693e-08	2.00475
comp110887				16.5521	32.6213	0.482918	-6.07789	2.14141e-06	0.000281461	6.07789	yes
comp110899				285.84	497.537	74.1429	-2.74643	1.17146e-17	2.4869e-14	2.74643
comp110919				175.002	73.0387	276.964	1.92297	6.77729e-09	2.13869e-06	1.92297
comp110941				48.8536	10.7975	86.9098	3.00882	2.91499e-09	1.03138e-06	3.00882
comp110948				44.9287	10.8162	79.0412	2.86941	4.39036e-08	1.05694e-05	2.86941
comp110966	RING/U-box superfamily protein; CONTAINS InterPro DOMAIN/s: Zinc finger, RING-type (InterPro:IPR001841); BEST Arabidopsis thaliana protein match is: RING/U-box superfamily protein (TAIR:AT4G13100.1); Has 35333 Blast hits to 34131 proteins in 2444 species: Archae - 798; Bacteria - 22429; Metazoa - 974; Fungi - 991; Plants - 531; Viruses - 0; Other Eukaryotes - 9610 (source: NCBI BLink).	AT3G25030.2	2e-20	115.263	60.9962	169.53	1.47475	0.000123879	0.00781141	1.47475	yes
comp110972				38.7729	9.50345	68.0424	2.83991	1.07174e-07	2.36105e-05	2.83991
comp110995				1084.96	578.792	1591.13	1.45893	7.28549e-06	0.000770985	1.45893
comp110999	bacterial contamination			14.0091	28.0183	0	-Inf	1.24137e-06	0.000181178	Inf
comp111004	ATBCA4, BCA4 | beta carbonic anhydrase 4	AT1G70410.1	1e-57	116.656	215.854	17.4569	-3.62819	2.01242e-19	5.4224e-16	3.62819
comp111005	phosphatidyl inositol monophosphate 5 kinase (PIP5K9); FUNCTIONS IN: 1-phosphatidylinositol-4-phosphate 5-kinase activity, phosphatidylinositol phosphate kinase activity, ATP binding; INVOLVED IN: carbohydrate metabolic process, cellular amino acid metabolic process; LOCATED IN: cytosol, nucleus, membrane; EXPRESSED IN: 22 plant structures; EXPRESSED DURING: 13 growth stages; CONTAINS InterPro DO…	AT3G09920.3	2e-119	228.042	127.718	328.366	1.36234	9.7984e-05	0.00651778	1.36234
comp111013	Protein of unknown function (DUF1191); FUNCTIONS IN: molecular_function unknown; INVOLVED IN: biological_process unknown; LOCATED IN: plasma membrane; EXPRESSED IN: 23 plant structures; EXPRESSED DURING: 13 growth stages; CONTAINS InterPro DOMAIN/s: Protein of unknown function DUF1191 (InterPro:IPR010605); BEST Arabidopsis thaliana protein match is: Protein of unknown function (DUF1191) (TAIR:AT4…	AT3G08600.1	2e-20	1358.61	791.701	1925.52	1.28222	4.89043e-06	0.000561646	1.28222
comp111018				20.885	2.53141	39.2386	3.95426	5.93508e-05	0.00435673	3.95426
comp111031	Alkaline-phosphatase-like family protein; FUNCTIONS IN: transferase activity, catalytic activity; INVOLVED IN: metabolic process, phospholipid biosynthetic process; LOCATED IN: endomembrane system; EXPRESSED IN: 21 plant structures; EXPRESSED DURING: 8 growth stages; CONTAINS InterPro DOMAIN/s: Alkaline phosphatase-like, alpha/beta/alpha (InterPro:IPR017849), Type I phosphodiesterase/nucleotide p…	AT2G22530.1	4e-167	224.614	120.513	328.714	1.44764	1.37025e-05	0.00130427	1.44764
comp111052				131.417	66.5553	196.278	1.56027	3.85937e-05	0.00308618	1.56027
comp111057				158.815	268.431	49.1995	-2.44783	2.52619e-09	9.10213e-07	2.44783
comp111060	maternal effect embryo arrest 44 (MEE44); FUNCTIONS IN: nucleotidyltransferase activity; INVOLVED IN: embryo development ending in seed dormancy; CONTAINS InterPro DOMAIN/s: Nucleotidyl transferase domain (InterPro:IPR002934), PAP/25A-associated (InterPro:IPR002058); BEST Arabidopsis thaliana protein match is: Nucleotidyltransferase family protein (TAIR:AT5G53770.1); Has 30201 Blast hits to 17322…	AT4G00060.1	6e-170	314.901	168.566	461.236	1.45219	7.23971e-06	0.000767592	1.45219
comp111071				43.2439	15.494	70.9939	2.19599	1.05402e-05	0.00105186	2.19599
comp111083				103.877	53.8279	153.926	1.51581	3.63366e-05	0.00295656	1.51581
comp111108	AAA-type ATPase family protein; FUNCTIONS IN: nucleoside-triphosphatase activity, DNA binding, DNA-directed DNA polymerase activity, nucleotide binding, ATP binding; INVOLVED IN: DNA replication; LOCATED IN: DNA polymerase III complex; CONTAINS InterPro DOMAIN/s: ATPase, AAA+ type, core (InterPro:IPR003593), ATPase, AAA-type, core (InterPro:IPR003959), DNA polymerase III, clamp loader complex, ga…	AT5G45720.1	2e-92	199.666	99.8139	299.519	1.58533	7.84974e-06	0.000818335	1.58533	yes
comp111110				66.1908	11.8365	120.545	3.34826	7.98375e-13	7.76819e-10	3.34826	yes
comp111117	glycosyltransferase family protein 2	AT5G60700.1	0	142.173	197.188	87.1573	-1.17788	0.000142063	0.0087172	1.17788
comp111156	Leucine-rich repeat protein kinase family protein; FUNCTIONS IN: protein kinase activity, kinase activity; INVOLVED IN: protein amino acid phosphorylation; LOCATED IN: endomembrane system; EXPRESSED IN: 21 plant structures; EXPRESSED DURING: 13 growth stages; CONTAINS InterPro DOMAIN/s: Protein kinase, ATP binding site (InterPro:IPR017441), Protein kinase, catalytic domain (InterPro:IPR000719), S…	AT1G67720.1	2e-30	383.019	190.786	575.252	1.59224	1.41109e-07	2.95973e-05	1.59224
comp111170				31.7735	7.24652	56.3004	2.95779	6.69941e-07	0.000109147	2.95779
comp111185	B-block binding subunit of TFIIIC; CONTAINS InterPro DOMAIN/s: B-block binding subunit of TFIIIC (InterPro:IPR007309); BEST Arabidopsis thaliana protein match is: B-block binding subunit of TFIIIC (TAIR:AT1G17450.2); Has 138 Blast hits to 121 proteins in 36 species: Archae - 0; Bacteria - 0; Metazoa - 34; Fungi - 3; Plants - 91; Viruses - 0; Other Eukaryotes - 10 (source: NCBI BLink).	AT1G59453.1	2e-138	1414.94	753.15	2076.73	1.4633	1.03634e-06	0.000155798	1.4633
comp111200				22.2667	6.32852	38.2048	2.59381	0.000123528	0.00779629	2.59381
comp111205	Related to TOR proteins from yeast and mammals, regulators of cell growth in response to nutrient availability. TOR proteins belong to the family of phosphatidylinositol 3-kinase and are targets of the antiproliferative drug rapamycin. AtTOR binds the yeast FKBP12 protein in the presence of Rapamycin, is involved in embryogenesis and is expressed in embryos, endosperm and meristems.	AT1G50030.1	6e-20	693.238	345.133	1041.34	1.59322	2.25511e-07	4.51383e-05	1.59322	yes
comp111213				40.915	16.2917	65.5383	2.0082	5.11399e-05	0.00383993	2.0082	yes
comp111214	Histidine kinase: cytokinin-binding receptor that transduces cytokinin signals across the plasma membrane	AT2G01830.2	2e-45	144.871	77.3203	212.421	1.45801	0.000146434	0.00892399	1.45801
comp111218	retroelement		6e-06		106.67	32.5844	-1.7109	4.86543e-05	0.00369688	1.7109
comp111219	Leucine-rich repeat protein kinase family protein; FUNCTIONS IN: protein serine/threonine kinase activity, protein kinase activity, ATP binding; INVOLVED IN: transmembrane receptor protein tyrosine kinase signaling pathway, protein amino acid phosphorylation; LOCATED IN: plasma membrane, membrane; EXPRESSED IN: 20 plant structures; EXPRESSED DURING: 9 growth stages; CONTAINS InterPro DOMAIN/s: Pr…	AT1G06840.1	9e-160	729.761	436.809	1022.71	1.22733	3.81565e-05	0.00306196	1.22733
comp111247	mechanosensitive channel of small conductance-like 10 (MSL10); FUNCTIONS IN: mechanically-gated ion channel activity; INVOLVED IN: detection of mechanical stimulus; LOCATED IN: plasma membrane, membrane; EXPRESSED IN: 26 plant structures; EXPRESSED DURING: 13 growth stages; CONTAINS InterPro DOMAIN/s: Membrane protein, At2g17000, predicted (InterPro:IPR016688), Like-Sm ribonucleoprotein (LSM)-rel…	AT5G12080.3	1e-15	158.712	73.2875	244.137	1.73605	2.60408e-06	0.000328114	1.73605
comp111253				414.484	204.872	624.097	1.60705	4.00128e-07	7.22458e-05	1.60705
comp111260				21.2657	4.61761	37.9138	3.0375	3.66e-05	0.00297364	3.0375
comp111267	ATP-dependent RNA helicase, putative; FUNCTIONS IN: in 6 functions; LOCATED IN: cytosol, mitochondrion; EXPRESSED IN: 24 plant structures; EXPRESSED DURING: 15 growth stages; CONTAINS InterPro DOMAIN/s: Helicase-associated domain (InterPro:IPR007502), DNA/RNA helicase, DEAD/DEAH box type, N-terminal (InterPro:IPR011545), Nucleic acid-binding, OB-fold (InterPro:IPR012340), Domain of unknown functi…	AT3G26560.1	1e-38	3338.5	1890.37	4786.63	1.34034	5.4334e-06	0.000610003	1.34034	yes
comp111282				27.2326	7.68686	46.7784	2.60537	1.75771e-05	0.00159299	2.60537
comp111330	Similar to maize DEK1, a gene encoding a membrane protein of the calpain gene superfamily required for aleurone cell development in the endosperm of maize grains. A key component of the embryonic L1 cell-layer specification pathway. It localizes to membranes and undergoes intramolecular autolytic cleavage events that release the calpain domain into the cytoplasm.	AT1G55350.4	0	566.596	244.104	889.087	1.86483	3.03699e-09	1.06914e-06	1.86483
comp111344	Adenine nucleotide alpha hydrolases-like superfamily protein; FUNCTIONS IN: molecular_function unknown; INVOLVED IN: response to stress; LOCATED IN: cellular_component unknown; EXPRESSED IN: 22 plant structures; EXPRESSED DURING: 13 growth stages; CONTAINS InterPro DOMAIN/s: UspA (InterPro:IPR006016), Rossmann-like alpha/beta/alpha sandwich fold (InterPro:IPR014729), Universal stress protein A (I…	AT5G14680.1	8e-12	25.3561	6.52275	44.1895	2.76015	9.40205e-06	0.00096721	2.76015
comp111353				30.9807	5.49345	56.4679	3.36165	2.87421e-08	7.54141e-06	3.36165
comp111389				12.2068	1.7247	22.689	3.71757	0.000122339	0.00774217	3.71757
comp111391	STICHEL mutant shows trichomes with fewer than normal branches.	AT2G02480.1	4e-73	185.996	96.0467	275.946	1.52258	2.17817e-05	0.00191221	1.52258
comp111410				26.811	4.03351	49.5885	3.6199	9.93175e-08	2.19489e-05	3.6199
comp111443	Leucine-rich repeat protein kinase family protein; FUNCTIONS IN: protein kinase activity, kinase activity; INVOLVED IN: protein amino acid phosphorylation; LOCATED IN: endomembrane system; EXPRESSED IN: 21 plant structures; EXPRESSED DURING: 13 growth stages; CONTAINS InterPro DOMAIN/s: Protein kinase, ATP binding site (InterPro:IPR017441), Protein kinase, catalytic domain (InterPro:IPR000719), S…	AT1G67720.1	8e-18	78.4318	24.7651	132.099	2.41523	7.07865e-09	2.21385e-06	2.41523
comp111448				141.221	59.0261	223.416	1.9203	1.32084e-07	2.81254e-05	1.9203
comp111452	Pentatricopeptide repeat (PPR-like) superfamily protein; FUNCTIONS IN: molecular_function unknown; INVOLVED IN: biological_process unknown; LOCATED IN: membrane; EXPRESSED IN: 22 plant structures; EXPRESSED DURING: 13 growth stages; CONTAINS InterPro DOMAIN/s: Pentatricopeptide repeat (InterPro:IPR002885); BEST Arabidopsis thaliana protein match is: Pentatricopeptide repeat (PPR-like) superfamily…	AT1G09900.1	3e-14	289.324	168.928	409.72	1.27823	0.000107579	0.00698476	1.27823
comp111458	PHLOEM INTERCALATED WITH XYLEM (PXY); FUNCTIONS IN: protein serine/threonine kinase activity, protein kinase activity, ATP binding; INVOLVED IN: protein amino acid phosphorylation; LOCATED IN: plasma membrane; EXPRESSED IN: 20 plant structures; EXPRESSED DURING: 13 growth stages; CONTAINS InterPro DOMAIN/s: Protein kinase, ATP binding site (InterPro:IPR017441), Protein kinase, catalytic domain (I…	AT5G61480.1	2e-46	120.812	52.2206	189.404	1.85878	1.67618e-06	0.000234384	1.85878
comp111459				27.2413	5.6096	48.873	3.12307	5.18776e-07	8.86423e-05	3.12307
comp111460				17.1273	3.33811	30.9164	3.21127	5.55674e-05	0.00412813	3.21127
comp111491	Encodes a CDC20 protein that interacts with APC subunits, components of the mitochondrial checkpoint complex and mitotic cyclin substrates and is indispensable for normal plant development and fertility.	AT4G33260.1	4e-158	108.193	182.354	34.031	-2.42183	4.98773e-07	8.58527e-05	2.42183
comp111496	RESISTANCE TO LEPTOSPHAERIA MACULANS 3 (RLM3); FUNCTIONS IN: transmembrane receptor activity, ATP binding; INVOLVED IN: defense response to fungus, incompatible interaction, regulation of defense response by callose deposition, defense response; LOCATED IN: intrinsic to membrane; EXPRESSED IN: 20 plant structures; EXPRESSED DURING: 13 growth stages; CONTAINS InterPro DOMAIN/s: NB-ARC (InterPro:IP…	AT4G16990.1	1e-19	140.619	70.7396	210.498	1.57321	3.562e-06	0.000428762	1.57321	yes
comp111506				30.8752	10.7789	50.9716	2.24149	6.70443e-05	0.00476518	2.24149
comp111521	HDA14, a member of the histone deacetylase family proteins that can deacetylate a-tubulin, associates with a/b-tubulin and is retained on GTP/taxol-stabilized microtubules, at least in part, by direct association with the PP2A-A2 subunit. The association of a histone deacetylase with PP2A suggests a direct link between protein phosphorylation and acetylation.	AT4G33470.1	0	3676.29	2224.72	5127.86	1.20473	0.00011638	0.0074119	1.20473
comp111568				32.659	9.31407	56.0039	2.58804	7.24247e-06	0.000767592	2.58804
comp111577				152.048	76.7763	227.319	1.56599	1.09584e-05	0.0010759	1.56599
comp111581	retrotransposon ty3-gypsy subclass		1e-37	49.4629	18.8321	80.0938	2.0885	1.22e-05	0.00117854	2.0885
comp111593	AAA-type ATPase family protein; FUNCTIONS IN: nucleoside-triphosphatase activity, ATPase activity, nucleotide binding, ATP binding; LOCATED IN: chloroplast; EXPRESSED IN: 25 plant structures; EXPRESSED DURING: 15 growth stages; CONTAINS InterPro DOMAIN/s: ATPase, AAA+ type, core (InterPro:IPR003593), ATPase, AAA-type, core (InterPro:IPR003959), ATPase, AAA-type, conserved site (InterPro:IPR003960…	AT1G02890.1	1e-103	1000.91	574.767	1427.05	1.31198	1.39598e-05	0.00131979	1.31198
comp111614				47.3989	14.7246	80.0732	2.44309	3.03921e-05	0.00253772	2.44309
comp111615	unknown protein; FUNCTIONS IN: molecular_function unknown; INVOLVED IN: biological_process unknown; LOCATED IN: endomembrane system; EXPRESSED IN: shoot, sperm cell; CONTAINS InterPro DOMAIN/s: Protein of unknown function DUF3595 (InterPro:IPR021999); Has 533 Blast hits to 341 proteins in 95 species: Archae - 2; Bacteria - 15; Metazoa - 318; Fungi - 0; Plants - 93; Viruses - 0; Other Eukaryotes -…	AT2G48060.1	0	990.045	511.442	1468.65	1.52185	5.16735e-07	8.85094e-05	1.52185	yes
comp111618				93.3522	30.0008	156.704	2.38496	4.16393e-09	1.38909e-06	2.38496
comp111626	calmodulin, which is an EF-hand family of Ca2+-binding proteins. This gene is expressed in leaves, flowers and siliques. The gene functionally complements yeast calmodulin 1 (CAM1) but only when selected against the plasmid harboring wild-type yeast sequences. Also the protein does not form formed a complex with a basic amphiphilic helical peptide in the presence of Ca2+ in vitro. Authors suggest…	AT3G51920.1	2e-11	573.885	801.209	346.561	-1.20907	1.98641e-05	0.00177274	1.20907
comp111653	retrotransposon unclassified		2.6e-39	19.378	2.99041	35.7657	3.58016	5.03e-05	0.00378982	3.58016
comp111653	retrotransposon unclassified	2.6e-39	11.96 (low counts)								yes
comp111655				189.962	46.1977	333.727	2.85277	1.86078e-16	2.9627e-13	2.85277
comp111683	GDP-mannose pyrophosphorylase/ mannose-1-pyrophosphatase. This enzyme provides GDP-mannose, which is used for cell wall carbohydrate biosynthesis and protein glycosylation as well as for ascorbate (vitamin C) biosynthesis. Mutations in this gene confer hypersensitivity to NH4+.	AT2G39770.2	0	2261.66	1220.35	3302.98	1.43647	4.49467e-07	7.96929e-05	1.43647
comp111720	Encodes a subunit of RNA polymerase IV (aka RNA polymerase D). NRPD2b is closely related to NRPD2a, but has lower levels of transcription and does not affect endogenous siRNA when mutated.	AT3G18090.1	0	1026.89	580.138	1473.64	1.34492	1.06673e-05	0.00105851	1.34492	yes
comp111739				178.538	33.5379	323.538	3.27007	3.00852e-18	7.0255e-15	3.27007
comp111744				135.979	55.3922	216.567	1.96706	4.46593e-05	0.00345708	1.96706
comp111756				144.903	78.5812	211.225	1.42652	9.96317e-05	0.00658532	1.42652
comp111757	transferases;folic acid binding; FUNCTIONS IN: folic acid binding, transferase activity; INVOLVED IN: metabolic process; EXPRESSED IN: 24 plant structures; EXPRESSED DURING: 15 growth stages; CONTAINS InterPro DOMAIN/s: Formiminotransferase, N-terminal subdomain (InterPro:IPR012886), Essential protein Yae1, N-terminal (InterPro:IPR019191), Formiminotransferas, N- and C-terminal subdomains (InterP…	AT2G20830.2	1e-22	4752.53	3086.21	6418.85	1.05648	0.000125751	0.00790809	1.05648
comp111799	INVOLVED IN: protein localization; EXPRESSED IN: 22 plant structures; EXPRESSED DURING: 13 growth stages; CONTAINS InterPro DOMAIN/s: Vacuolar protein sorting-associated protein (InterPro:IPR009543); BEST Arabidopsis thaliana protein match is: calcium-dependent lipid-binding family protein (TAIR:AT1G48090.1); Has 2219 Blast hits to 1322 proteins in 202 species: Archae - 0; Bacteria - 2; Metazoa -…	AT5G24740.1	1e-92	567.615	282.792	852.438	1.59186	3.7192e-07	6.76759e-05	1.59186
comp111805	Histidine kinase: cytokinin-binding receptor that transduces cytokinin signals across the plasma membrane	AT2G01830.1	5e-72	209.834	99.1843	320.484	1.69207	8.56606e-07	0.000132766	1.69207	yes
comp111834	member of MRP subfamily	AT3G60970.1	3e-101	804.055	447.997	1160.11	1.3727	1.80071e-06	0.00024784	1.3727
comp111840	mechanosensitive channel of small conductance-like 10 (MSL10); FUNCTIONS IN: mechanically-gated ion channel activity; INVOLVED IN: detection of mechanical stimulus; LOCATED IN: plasma membrane, membrane; EXPRESSED IN: 26 plant structures; EXPRESSED DURING: 13 growth stages; CONTAINS InterPro DOMAIN/s: Membrane protein, At2g17000, predicted (InterPro:IPR016688), Like-Sm ribonucleoprotein (LSM)-rel…	AT5G11700.2	0	81.5026	37.6537	125.351	1.73512	2.44512e-05	0.00211215	1.73512
comp111847				28.7066	2.17885	55.2344	4.66393	8.6156e-11	4.60744e-08	4.66393
comp111859	CPL3;C-terminal domain phosphatase-like 3 (CPL3); FUNCTIONS IN: phosphoprotein phosphatase activity, CTD phosphatase activity; INVOLVED IN: response to salt stress; LOCATED IN: nucleus; EXPRESSED IN: 22 plant structures; EXPRESSED DURING: 12 growth stages; CONTAINS InterPro DOMAIN/s: FCP1-like phosphatase, phosphatase domain (InterPro:IPR011947), NLI interacting factor (InterPro:IPR004274), BRCT …	AT2G33540.1	4e-19	116.451	59.6607	173.241	1.53793	3.39017e-05	0.00278431	1.53793
comp111863				8.84113	0.347701	17.3346	5.63966	7.84714e-05	0.00539489	5.63966
comp111871				236.415	133.616	339.213	1.3441	7.86316e-05	0.0054006	1.3441
comp111873				533.91	280.484	787.336	1.48906	1.72083e-07	3.53533e-05	1.48906
comp111888	retroelement		5e-17	22.0673	4.25126	39.8833	3.22982	4.86917e-06	0.000560122	3.22982
comp111898	retroelement pol poly		9.4e-15	32.1993	6.30501	58.0935	3.20381	6.52121e-08	1.49297e-05	3.20381
comp111919				8991.55	4976.02	13007.1	1.38623	7.55359e-07	0.000119992	1.38623
comp111925	Encodes a protein that is predicted to act as a 1-phosphatidylinositol-3-phosphate (PtdIns3P) 5-kinase based on its homology to Fab1 from yeast. It contains an FYVE domain required for binding to PtdIns3P-containing membranes in yeast, as well as a Cpn60_TCP1 homology domain plus a kinase domain. fab1a/fab1b pollen grains not viable and have defective vacuolar organization. FAB1A and FAB1B comple…	AT3G14270.1	3e-160	1415.7	737.006	2094.4	1.50679	3.57853e-07	6.56277e-05	1.50679
comp111930				36.5601	11.5026	61.6175	2.42138	1.00962e-05	0.00102064	2.42138	yes
comp111932				44.0824	16.9221	71.2426	2.07383	6.28365e-05	0.00455701	2.07383	yes
comp111937				3388.01	1905.62	4870.4	1.35378	0.000102414	0.00670535	1.35378
comp111946				32.0192	10.315	53.7234	2.38081	1.94944e-05	0.00174197	2.38081
comp111947				66.7342	18.7394	114.729	2.61408	5.74284e-07	9.53366e-05	2.61408
comp111964				1400.69	2120.34	681.05	-1.63846	9.05734e-09	2.75879e-06	1.63846	yes
comp111967	ATR protein kinase that is involved in a wide range of responses to DNA damage and plays a central role in cell-cycle regulation. Dominant loss of function alleles identified as suppressors of ALS also exhibit increased tolerance to aluminum. This may be due to the inhibition of terminal differentiation of the root apex upon exposure to Al.	AT5G40820.1	7e-66	131.647	38.2662	225.028	2.55596	1.37282e-11	9.40947e-09	2.55596
comp111987	unknown protein; FUNCTIONS IN: molecular_function unknown; INVOLVED IN: biological_process unknown; LOCATED IN: cellular_component unknown; EXPRESSED IN: 26 plant structures; EXPRESSED DURING: 15 growth stages; Has 27734 Blast hits to 16708 proteins in 1259 species: Archae - 81; Bacteria - 3434; Metazoa - 10876; Fungi - 2514; Plants - 987; Viruses - 212; Other Eukaryotes - 9630 (source: NCBI BLin…	AT3G50370.1	5e-13	5666.7	3454.98	7878.42	1.18923	5.72652e-05	0.00422736	1.18923
comp112018				1090.32	648.274	1532.37	1.24109	6.85616e-06	0.000732054	1.24109
comp112045	gag-pol polyprotein		1.8e-154	1893.28	1094.33	2692.23	1.29875	7.09741e-05	0.00497216	1.29875
comp112053				412.655	640.473	184.837	-1.79288	1.59351e-08	4.50141e-06	1.79288
comp112057				28.1273	6.0686	50.186	3.04785	5.45768e-07	9.16891e-05	3.04785
comp112059	retrotransposon ty3-gypsy subclass		4.2e-32	25.2214	6.91262	43.5303	2.65471	5.46e-05	0.0040641	2.65471
comp112063				94.2764	20.9183	167.634	3.00248	5.4117e-13	5.57532e-10	3.00248
comp112064	retrotransposon unclassified		2.1e-26	42.7867	14.9188	70.6546	2.24365	7.81055e-06	0.000815463	2.24365
comp112066	copia-like retrotransposable element		6e-38	42.8271	16.6525	69.0017	2.05089	5.2026e-05	0.00388979	2.05089
comp112070				53.2679	89.3755	17.1604	-2.3808	6.56385e-06	0.000710722	2.3808
comp112073				145.238	69.9715	220.504	1.65597	6.51271e-06	0.000707372	1.65597
comp112085	Disease resistance protein (TIR-NBS-LRR class) family; FUNCTIONS IN: transmembrane receptor activity, nucleoside-triphosphatase activity, nucleotide binding, ATP binding; INVOLVED IN: signal transduction, apoptosis, defense response, innate immune response; LOCATED IN: intrinsic to membrane, endomembrane system; EXPRESSED IN: 20 plant structures; EXPRESSED DURING: 14 growth stages; CONTAINS Inter…	AT3G44400.2	3e-20	66.9441	26.4615	107.427	2.02139	2.0369e-06	0.000272843	2.02139
comp112090	retrotransposon ty1-copia subclass		5.6e-23	145.195	63.8055	226.584	1.82829	3.07269e-07	5.75562e-05	1.82829
comp112111				434.096	162.685	705.506	2.11658	1.61254e-12	1.46712e-09	2.11658
comp112119	homolog of the human ATM gene, which is mutated in ataxia telangiectasia, a chromosome instability disorder. Characterization of mutants suggest a role in repairing DNA in response to ionizing radiation as well as during meiosis. The protein has kinase domains and shows kinase activity in orthologs. There is also evidence that ATM might be involved in the telomerase-independent process known as A…	AT3G48190.1	1e-15	191.748	103.543	279.953	1.43496	7.57662e-05	0.00523459	1.43496
comp112124				566.16	759.07	373.25	-1.02409	0.00011086	0.00714505	1.02409
comp112125				2182.86	3426.2	939.509	-1.86663	3.45067e-08	8.7587e-06	1.86663
comp112142	DICER4; Encodes a Dicer homolog. Dicer is a RNA helicase involved in microRNA processing. Mutations in this locus can result in embryo lethality. Embryo shape at seed maturity is globular-elongate. Other mutants convert the floral meristems to an indeterminate state, others yet show defects in ovule development. mRNA is expressed in all shoot tissues. DCL1 is able to produce miRNAs and siRNAs.	AT1G01040.1	0	562.025	318.55	805.499	1.33836	1.19367e-05	0.00115822	1.33836
comp112154				206.956	113.896	300.016	1.39733	3.0319e-05	0.00253464	1.39733
comp112157				321.993	85.3143	558.671	2.71114	4.00395e-17	7.19233e-14	2.71114
comp112176	A repressor of transcriptional gene silencing. Functions by demethylating the target promoter DNA. Interacts physically with RPA2/ROR1. In the ros1 mutants, an increase in methylation is observed in a number of gene promoters. Among the loci affected by ros1, a few (RD29A and At1g76930) are affected in cytosine methylation in all sequence contexts (CpG, CpNpG or CpNpN), although many others are a…	AT2G36490.1	8e-88	413.199	223.548	602.85	1.43122	1.57536e-05	0.0014579	1.43122	yes
comp112182				1044.83	579.405	1510.26	1.38215	1.36054e-06	0.000195716	1.38215
comp112188				117.861	24.8675	210.854	3.08391	2.24048e-15	3.13918e-12	3.08391
comp112196	Zinc finger C-x8-C-x5-C-x3-H type family protein; FUNCTIONS IN: zinc ion binding, nucleic acid binding; INVOLVED IN: biological_process unknown; LOCATED IN: cellular_component unknown; EXPRESSED IN: 23 plant structures; EXPRESSED DURING: 13 growth stages; CONTAINS InterPro DOMAIN/s: Zinc finger, CCCH-type (InterPro:IPR000571); Has 6412 Blast hits to 4180 proteins in 441 species: Archae - 2; Bacte…	AT1G21580.1	9e-102	2070.77	1054.04	3087.5	1.55052	2.46308e-06	0.000316032	1.55052
comp112197	retrovirus-related pol polyprotein from transposon tnt 1-94		5e-45	45.3743	8.05322	82.6953	3.36017	3.81e-10	1.77e-07	3.36017
comp112204	P-loop containing nucleoside triphosphate hydrolases superfamily protein; FUNCTIONS IN: nucleoside-triphosphatase activity, ATPase activity, nucleotide binding, ATP binding; INVOLVED IN: biological_process unknown; LOCATED IN: endomembrane system; EXPRESSED IN: 20 plant structures; EXPRESSED DURING: 12 growth stages; CONTAINS InterPro DOMAIN/s: ATPase, AAA-type, core (InterPro:IPR003959), ATPase,…	AT4G25835.1	4e-117	238.425	152.161	324.689	1.09346	0.000147625	0.00896967	1.09346
comp112206	non-ltr retroelement reverse transcriptase		1e-18	28.7419	8.72997	48.7539	2.48147	3.35e-05	0.00276279	2.48147
comp112226				129.709	24.8454	234.573	3.23899	1.5154e-16	2.4689e-13	3.23899
comp112237	nuclear targeted protein that plays a role in the CBF pathway -downstream of CBF translation. Mutants have impaired cold responses, reduced levels of cold induced RNA transcripts, are sensitive to osmotic stress.	AT4G04920.2	2e-41	676.593	403.139	950.047	1.23672	6.47112e-05	0.00464965	1.23672
comp112244	Disease resistance protein (TIR-NBS-LRR class) family; FUNCTIONS IN: transmembrane receptor activity, ATP binding; INVOLVED IN: signal transduction, defense response, apoptosis, innate immune response; LOCATED IN: intrinsic to membrane; EXPRESSED IN: 19 plant structures; EXPRESSED DURING: 13 growth stages; CONTAINS InterPro DOMAIN/s: NB-ARC (InterPro:IPR002182), Disease resistance protein (InterP…	AT5G36930.1	3e-18	194.724	98.1627	291.285	1.56919	2.34944e-06	0.000305366	1.56919
comp112245				359.889	156.974	562.803	1.8421	1.24156e-08	3.64156e-06	1.8421
comp112266	Protein of unknown function (DUF1997); CONTAINS InterPro DOMAIN/s: Protein of unknown function DUF1997 (InterPro:IPR018971); BEST Arabidopsis thaliana protein match is: Protein of unknown function (DUF1997) (TAIR:AT5G04440.1); Has 178 Blast hits to 178 proteins in 45 species: Archae - 0; Bacteria - 51; Metazoa - 0; Fungi - 0; Plants - 75; Viruses - 0; Other Eukaryotes - 52 (source: NCBI BLink).	AT4G31115.1	6e-44	3170.63	1952.05	4389.21	1.16897	6.49959e-05	0.00466532	1.16897
comp112268				231.591	131.88	331.302	1.32892	4.26939e-05	0.00334156	1.32892
comp112272				40.7659	6.56492	74.9669	3.51341	7.45871e-10	3.1289e-07	3.51341
comp112296	ent-kaurene synthase; Catalyzes the conversion of geranylgeranyl pyrophosphate (GGPP) to copalyl pyrophosphate (CPP) of gibberellin biosynthesis	AT4G02780.1	3e-159	1216.48	1662.71	770.255	-1.11013	1.57939e-05	0.0014597	1.11013
comp112307				22.7629	6.21722	39.3086	2.6605	9.49361e-05	0.00634623	2.6605
comp112312	encodes a protein of unknown function. The transcript has extensive RNA editing at the 3' end. Protein has orthologous in other plants and sequence is similar to E. coli ORFs orf154 and orf131, both of unknown function. So far, similar proteins are found only in plants and prokaryotes.	ATMG00570.1	1e-52	258.848	449.657	68.0385	-2.7244	1.26234e-07	2.71272e-05	2.7244
comp112314				17.1801	3.22681	31.1334	3.27029	5.01129e-05	0.00378309	3.27029
comp112320	2-oxoglutarate dehydrogenase, E1 component; FUNCTIONS IN: oxoglutarate dehydrogenase (succinyl-transferring) activity, cobalt ion binding, zinc ion binding; INVOLVED IN: response to cadmium ion; LOCATED IN: mitochondrion; EXPRESSED IN: 23 plant structures; EXPRESSED DURING: 11 growth stages; CONTAINS InterPro DOMAIN/s: 2-oxoglutarate dehydrogenase, E1 component (InterPro:IPR011603), Dehydrogenase…	AT5G65750.1	3e-19	318.546	159.799	477.293	1.57862	1.23048e-06	0.000180668	1.57862
comp112321				120.569	41.2525	199.886	2.27663	1.78749e-09	6.76887e-07	2.27663
comp112352	ankyrin repeat family protein / regulator of chromosome condensation (RCC1) family protein; CONTAINS InterPro DOMAIN/s: Regulator of chromosome condensation/beta-lactamase-inhibitor protein II (InterPro:IPR009091), Regulator of chromosome condensation, RCC1 (InterPro:IPR000408), Ankyrin repeat-containing domain (InterPro:IPR020683), Ankyrin repeat (InterPro:IPR002110); BEST Arabidopsis thaliana p…	AT3G03790.1	6e-162	1099.43	657.202	1541.67	1.23008	2.39179e-05	0.00207375	1.23008
comp112354	Tetratricopeptide repeat (TPR)-like superfamily protein; CONTAINS InterPro DOMAIN/s: Pentatricopeptide repeat (InterPro:IPR002885); BEST Arabidopsis thaliana protein match is: Pentatricopeptide repeat (PPR) superfamily protein (TAIR:AT4G13650.1); Has 54594 Blast hits to 14874 proteins in 305 species: Archae - 2; Bacteria - 30; Metazoa - 158; Fungi - 263; Plants - 53396; Viruses - 0; Other Eukaryo…	AT2G27610.1	1e-129	832.126	442.97	1221.28	1.46311	1.34656e-06	0.000194105	1.46311
comp112359	Encodes a topoisomerase II that is highly expressed in young seedlings. The protein is localized in the nucleus and gene expression levels are increased in proliferative tissues.	AT3G23890.1	0	5977.12	2945.62	9008.62	1.61274	2.06032e-08	5.68259e-06	1.61274
comp112360				25.9065	7.7836	44.0294	2.49996	0.000148913	0.00901663	2.49996
comp112365				2272.19	3728.1	816.283	-2.1913	5.06888e-05	0.00381424	2.1913
comp112374				391.982	181.687	602.277	1.72897	2.24712e-05	0.00196121	1.72897
comp112380				28.6894	1.94245	55.4364	4.83488	1.9986e-11	1.22819e-08	4.83488
comp112389				109.083	184.816	33.35	-2.47033	1.38767e-11	9.40947e-09	2.47033
comp112391	SBP (S-ribonuclease binding protein) family protein; FUNCTIONS IN: zinc ion binding; INVOLVED IN: biological_process unknown; LOCATED IN: cellular_component unknown; EXPRESSED IN: 24 plant structures; EXPRESSED DURING: 15 growth stages; CONTAINS InterPro DOMAIN/s: Zinc finger, RING-type (InterPro:IPR001841), S-ribonuclease binding protein, SBP1, pollen (InterPro:IPR017066); BEST Arabidopsis thali…	AT1G10650.1	7e-33	1553.67	854.237	2253.1	1.3992	1.49953e-06	0.000213981	1.3992
comp112393				26.1445	5.75821	46.5307	3.01449	4.46215e-06	0.000524497	3.01449
comp112418	Encodes a cysteine-rich receptor-like protein kinase.	AT4G23160.1	2e-49	985.938	481.112	1490.76	1.63161	2.81926e-08	7.45307e-06	1.63161
comp112423				51.3205	13.2411	89.4	2.75525	3.97715e-08	9.81068e-06	2.75525
comp112439				963.352	233.03	1693.67	2.86157	4.2227e-21	1.76606e-17	2.86157
comp112442				264.392	140.981	387.804	1.45982	1.45842e-05	0.00137327	1.45982
comp112444	Zinc finger, C3HC4 type (RING finger) family protein; FUNCTIONS IN: zinc ion binding, ATP binding; EXPRESSED IN: 22 plant structures; EXPRESSED DURING: 13 growth stages; CONTAINS InterPro DOMAIN/s: Zinc finger, RING-type (InterPro:IPR001841), ATPase-like, ATP-binding domain (InterPro:IPR003594); BEST Arabidopsis thaliana protein match is: Transmembrane Fragile-X-F-associated protein (TAIR:AT1G739…	AT5G23110.1	0	580.538	291.393	869.684	1.57752	2.18e-07	4.4e-05	1.57752
comp112447	hAT transposon superfamily; FUNCTIONS IN: protein dimerization activity, DNA binding; INVOLVED IN: biological_process unknown; LOCATED IN: cellular_component unknown; EXPRESSED IN: 19 plant structures; EXPRESSED DURING: 8 growth stages; CONTAINS InterPro DOMAIN/s: HAT dimerisation (InterPro:IPR008906), Zinc finger, BED-type predicted (InterPro:IPR003656), Protein of unknown function DUF659 (Inter…	AT4G15020.2	3e-12	716.068	346.375	1085.76	1.6483	7.25192e-08	1.64414e-05	1.6483
comp112457				120.539	220.08	20.9982	-3.38969	0.000109889	0.00709527	3.38969
comp112462	gag-pol polyprotein		3.5e-107	89.5829	27.8682	151.297	2.4407	2.88221e-07	5.44166e-05	2.4407
comp112467				256.189	141.512	370.866	1.38998	4.52976e-05	0.00348417	1.38998
comp112470				119.536	49.5912	189.481	1.9339	7.09209e-08	1.61838e-05	1.9339
comp112472	putative cytochrome P450	AT3G26210.1	8e-53	117.867	181.386	54.3492	-1.73873	9.41168e-07	0.000143962	1.73873
comp112479				23.3098	6.21722	40.4024	2.7001	6.01363e-05	0.00439761	2.7001
comp112497				137.351	68.5255	206.176	1.58917	1.06079e-05	0.00105411	1.58917
comp112500				1956.32	816.885	3095.76	1.92209	8.18467e-12	5.91119e-09	1.92209
comp112501	hAT transposon superfamily protein; CONTAINS InterPro DOMAIN/s: Protein of unknown function DUF659 (InterPro:IPR007021); BEST Arabidopsis thaliana protein match is: hAT transposon superfamily protein (TAIR:AT5G31412.1); Has 599 Blast hits to 592 proteins in 25 species: Archae - 0; Bacteria - 0; Metazoa - 11; Fungi - 2; Plants - 577; Viruses - 0; Other Eukaryotes - 9 (source: NCBI BLink).	AT1G43260.1	1e-17	24.2691	2.74915	45.7891	4.05795	7.58967e-07	0.000119992	4.05795
comp112505	hAT transposon superfamily; FUNCTIONS IN: protein dimerization activity, DNA binding; INVOLVED IN: biological_process unknown; LOCATED IN: cellular_component unknown; EXPRESSED IN: 19 plant structures; EXPRESSED DURING: 8 growth stages; CONTAINS InterPro DOMAIN/s: HAT dimerisation (InterPro:IPR008906), Zinc finger, BED-type predicted (InterPro:IPR003656), Protein of unknown function DUF659 (Inter…	AT4G15020.2	5e-14	59.1846	26.792	91.5771	1.77318	0.000134116	0.00830739	1.77318
comp112507	NADH dehydrogenase subunit 6	ATMG00270.1	1e-79	1041.76	1812.06	271.465	-2.73879	7.20309e-05	0.00502609	2.73879
comp112509				579.699	203.774	955.625	2.22947	2.33463e-13	2.51622e-10	2.22947
comp112519	RNA recognition motif (RRM)-containing protein; FUNCTIONS IN: RNA binding, nucleotide binding, nucleic acid binding; INVOLVED IN: biological_process unknown; LOCATED IN: cellular_component unknown; EXPRESSED IN: 23 plant structures; EXPRESSED DURING: 13 growth stages; CONTAINS InterPro DOMAIN/s: Spen paralogue and orthologue SPOC, C-terminal (InterPro:IPR012921), RNA recognition motif, RNP-1 (Int…	AT4G12640.1	9e-37	1122.91	502.451	1743.36	1.79482	1.20354e-09	4.81801e-07	1.79482
comp112524				1817.8	3014.57	621.035	-2.27921	6.39937e-12	4.82059e-09	2.27921
comp112525	retrotransposon protein		1.7e-12	94.5992	16.9912	172.207	3.34128	3.42634e-14	4.28635e-11	3.34128
comp112528	retrotransposon ty3-gypsy subclass		4.53-89	92.5438	21.9752	163.112	2.89192	7.00511e-12	5.16579e-09	2.89192
comp112532				440.148	204.64	675.656	1.7232	2.69618e-08	7.2093e-06	1.7232
comp112547				38.3366	13.9919	62.6813	2.16345	2.5638e-05	0.00219571	2.16345
comp112552				287.884	169.98	405.788	1.25536	6.74147e-05	0.00477533	1.25536
comp112555				64.1429	21.8322	106.454	2.2857	2.61723e-07	5.00963e-05	2.2857
comp112566	retrotransposon ty1-copia subclass		3.7e-23	27.7016	9.53182	45.8714	2.26677	0.000164886	0.00977265	2.26677
comp112572	AT-hook motif nuclear-localized protein 1 (AHL1); FUNCTIONS IN: DNA binding; LOCATED IN: mitochondrion, nucleolus, nucleus, cytoplasm; EXPRESSED IN: 9 plant structures; EXPRESSED DURING: LP.04 four leaves visible, 4 anthesis, petal differentiation and expansion stage; CONTAINS InterPro DOMAIN/s: Protein of unknown function DUF296 (InterPro:IPR005175), AT hook, DNA-binding motif (InterPro:IPR01795…	AT4G12080.1	8e-56	2905.98	1744.44	4067.52	1.22139	2.09639e-05	0.00184738	1.22139
comp112573				45.4837	15.1414	75.826	2.32419	2.05246e-06	0.00027388	2.32419
comp112574				65.9768	30.6865	101.267	1.72249	0.000102126	0.00669904	1.72249
comp112591	CONTAINS InterPro DOMAIN/s: Secretory pathway Sec39 (InterPro:IPR013244); Has 1807 Blast hits to 1807 proteins in 277 species: Archae - 0; Bacteria - 0; Metazoa - 736; Fungi - 347; Plants - 385; Viruses - 0; Other Eukaryotes - 339 (source: NCBI BLink).	AT5G24350.1	8e-105	990.857	439.167	1542.55	1.81247	9.57465e-10	3.89978e-07	1.81247
comp112607	cysteine-rich receptor-like protein kinase.	AT4G23160.1	9e-48	58.3522	22.7632	93.9411	2.04505	1.02673e-05	0.00102755	2.04505
comp112608	Eukaryotic aspartyl protease family protein; FUNCTIONS IN: aspartic-type endopeptidase activity; INVOLVED IN: proteolysis; LOCATED IN: endomembrane system; EXPRESSED IN: 10 plant structures; EXPRESSED DURING: 4 anthesis, C globular stage, petal differentiation and expansion stage; CONTAINS InterPro DOMAIN/s: Peptidase aspartic (InterPro:IPR021109), Peptidase aspartic, catalytic (InterPro:IPR00900…	AT2G03200.1	1e-40	424.742	158.113	691.372	2.12851	2.13101e-10	1.01558e-07	2.12851
comp112615	endonuclease-reverse transcriptase		1.6e-38	1089.46	396.984	1781.93	2.16628	3.74817e-09	1.26851e-06	2.16628
comp112632	retrotransposable element tf2 155 kda protein type 1-like		7.9e-16	65.4261	11.3913	119.461	3.39053	1.09438e-12	1.03015e-09	3.39053
comp112634				773.806	307.034	1240.58	2.01454	1.07677e-10	5.62942e-08	2.01454
comp112635	encodes a mitochondrial ribosomal protein L16, which is a constituent of the large ribosomal subunit	ATMG00080.1	4e-22	7158.79	11398.9	2918.64	-1.96553	0.000158521	0.0094999	1.96553
comp112642				82.9446	20.3066	145.583	2.84182	8.11982e-10	3.38597e-07	2.84182
comp112653				46.4976	17.6866	75.3085	2.09015	2.16905e-05	0.00190658	2.09015
comp112655	endonuclease-reverse transcriptase		8.8e-57	3448.68	1385.89	5511.47	1.99162	3.35816e-12	2.8007e-09	1.99162
comp112667	hAT dimerisation domain-containing protein; FUNCTIONS IN: protein dimerization activity, DNA binding; INVOLVED IN: biological_process unknown; LOCATED IN: cellular_component unknown; EXPRESSED IN: 22 plant structures; EXPRESSED DURING: 14 growth stages; CONTAINS InterPro DOMAIN/s: HAT dimerisation (InterPro:IPR008906), Zinc finger, BED-type predicted (InterPro:IPR003656), Protein of unknown funct…	AT3G17450.1	1e-35	87.4566	42.1421	132.771	1.65561	3.77881e-05	0.00303936	1.65561
comp112676				146.661	58.2348	235.088	2.01325	3.69733e-08	9.25072e-06	2.01325
comp112677				129.194	15.3225	243.065	3.98762	1.16985e-21	5.85391e-18	3.98762
comp112678	gag-pol polyprotein		1.2e-108	47.7133	14.831	80.5956	2.44208	1.01994e-06	0.000153993	2.44208
comp112684	retrotransposon ty3-gypsy subclass		0	172.698	45.2998	300.096	2.72785	7.71992e-13	7.61728e-10	2.72785
comp112685	retrotransposon unclassified		8.7e-45	45.2483	21.0428	69.4539	1.72273	0.000150239	0.00908904	1.72273
comp112689	endonuclease-reverse transcriptase		2.6e-57	3174.27	1184.56	5163.98	2.12414	8.77799e-11	4.65872e-08	2.12414
comp112691				180.321	65.1246	295.517	2.18197	1.01383e-06	0.000153993	2.18197
comp112694	gag-pol polyprotein		7.4e-101	763.773	253.493	1274.05	2.32941	3.26e-14	4.15e-11	2.32941
comp112699				979.192	406.552	1551.83	1.93246	6.53821e-11	3.55071e-08	1.93246
comp112700	hAT transposon superfamily; FUNCTIONS IN: protein dimerization activity, DNA binding; INVOLVED IN: biological_process unknown; LOCATED IN: cellular_component unknown; CONTAINS InterPro DOMAIN/s: HAT dimerisation (InterPro:IPR008906), Zinc finger, BED-type predicted (InterPro:IPR003656), Protein of unknown function DUF659 (InterPro:IPR007021); BEST Arabidopsis thaliana protein match is: hAT transp…	AT1G79740.1	2e-39	130.218	67.6849	192.751	1.50983	9.42551e-05	0.00630672	1.50983
comp112702	hypothetical protein	ATMG00750.1	9e-11	402.763	93.2376	712.288	2.93348	2.38943e-20	8.36969e-17	2.93348
comp112705	retrotransposon, unclassified		4.8e-76	76.8677	37.0704	116.665	1.65403	5.71e-05	0.00421939	1.65403
comp112872	Glycosyl hydrolase family protein; FUNCTIONS IN: hydrolase activity, hydrolyzing O-glycosyl compounds; INVOLVED IN: carbohydrate metabolic process; LOCATED IN: cellular_component unknown; EXPRESSED IN: 23 plant structures; EXPRESSED DURING: 13 growth stages; CONTAINS InterPro DOMAIN/s: Glycoside hydrolase, family 3, N-terminal (InterPro:IPR001764), Glycoside hydrolase, family 3, C-terminal (Inter…	AT3G47000.1	0	7426.13	4571.32	10280.9	1.16929	2.69907e-05	0.00229195	1.16929
comp112904				8437.36	5560.16	11314.6	1.02498	4.98155e-05	0.00377114	1.02498
comp112935				1920.08	616.05	3224.11	2.38778	2.29416e-16	3.57155e-13	2.38778
comp112936				2774.06	1684.5	3863.63	1.19764	3.2625e-05	0.00269844	1.19764	yes
comp112945	uclacyanin, a protein precursor that is closely related to precursors of stellacyanins and a blue copper protein from pea pods.	AT2G32300.1	2e-26	4641.29	2889.32	6393.27	1.14582	3.86345e-05	0.00308618	1.14582
comp112966	H(+)-ATPase 11	AT5G62670.1	0	16176.6	10013.6	22339.5	1.15764	4.30103e-05	0.00335538	1.15764
comp112986				8132.91	5089.38	11176.4	1.1349	1.05565e-05	0.00105199	1.1349
comp113045	Predicted to be secreted protein based on signalP prediction. Involved in starch mobilization. Mutants are defective in alpha-amylase activity. (Note: AMY1 has been found in the literature to be referred to as AMY3, which is not to be confused with AMY3/At1g69830).	AT4G25000.1	6e-151	7286.83	3851.49	10722.2	1.47711	3.94611e-08	9.7685e-06	1.47711
comp113049	member of MRP subfamily	AT3G21250.2	0	9749.51	5583.73	13915.3	1.31737	6.10414e-06	0.000674886	1.31737
comp113094	zinc finger (Ran-binding) family protein; FUNCTIONS IN: binding, zinc ion binding; LOCATED IN: intracellular, chloroplast; EXPRESSED IN: 22 plant structures; EXPRESSED DURING: 13 growth stages; CONTAINS InterPro DOMAIN/s: Zinc finger, RanBP2-type (InterPro:IPR001876); BEST Arabidopsis thaliana protein match is: Ran BP2/NZF zinc finger-like superfamily protein (TAIR:AT1G70650.2); Has 1648 Blast hi…	AT1G48570.1	4e-62	6842.19	4122.67	9561.71	1.21369	4.03129e-05	0.00317726	1.21369
comp113096				56.8476	24.2128	89.4824	1.88583	6.78723e-06	0.000725933	1.88583
comp113100	ATP binding/valine-tRNA ligase/aminoacyl-tRNA ligase	AT1G14610.1	0	9498.14	5877.24	13119	1.15845	6.69026e-05	0.00476314	1.15845
comp113101	leucine-rich repeat extensin-like protein 3	AT3G24480.1	2e-115	3506.8	2244.1	4769.51	1.0877	0.000100734	0.00663255	1.0877
comp113112	low affinity (10mM) sucrose transporter in sieve elements (phloem)	AT1G09960.1	6e-154	3837.15	1965.05	5709.26	1.53874	8.11455e-09	2.52655e-06	1.53874
comp113117	EMB1211 is a MORN (multiple membrane occupation and recognition nexus) motif containing protein involved in embryo development and chloroplast biogenesis.	AT5G22640.1	3e-141	6326.69	3303.35	9350.04	1.50104	3.41537e-07	6.31313e-05	1.50104
comp113160	2-oxoglutarate dehydrogenase, E1 component; FUNCTIONS IN: oxoglutarate dehydrogenase (succinyl-transferring) activity, cobalt ion binding, zinc ion binding; INVOLVED IN: response to cadmium ion; LOCATED IN: mitochondrion; EXPRESSED IN: 23 plant structures; EXPRESSED DURING: 11 growth stages; CONTAINS InterPro DOMAIN/s: 2-oxoglutarate dehydrogenase, E1 component (InterPro:IPR011603), Dehydrogenase…	AT5G65750.1	0	4984.26	2637.49	7331.04	1.47485	2.2224e-07	4.4611e-05	1.47485
comp113183	light harvesting complex photosystem II (LHCB4.1); FUNCTIONS IN: chlorophyll binding; INVOLVED IN: response to blue light, response to red light, response to far red light, photosynthesis;	AT5G01530.1	6e-126	5207.79	7234.97	3180.62	-1.18568	0.000158464	0.0094999	1.18568
comp113217	Encodes a vacuolar processing enzyme belonging to a novel group of cysteine proteases that is expressed specifically in seeds and is essential for the proper processing of storage proteins.	AT1G62710.1	0	1751.73	1123.71	2379.76	1.08255	4.41838e-05	0.00343164	1.08255	yes
comp113260	photosystem II subunit P-1	AT1G06680.1	8e-105	3601.45	5104.2	2098.71	-1.28218	1.49901e-05	0.00139647	1.28218
comp113263	tRNA synthetase class I (I, L, M and V) family protein; FUNCTIONS IN: isoleucine-tRNA ligase activity, nucleotide binding, aminoacyl-tRNA ligase activity, zinc ion binding, ATP binding; INVOLVED IN: response to cadmium ion, tRNA aminoacylation for protein translation; LOCATED IN: cytosol; EXPRESSED IN: male gametophyte, guard cell, epidermis, cultured cell, pollen tube; EXPRESSED DURING: L mature…	AT4G10320.1	0	7178.55	4497.29	9859.8	1.1325	0.000109583	0.00708203	1.1325	yes
comp113408	PRP39; FUNCTIONS IN: binding; INVOLVED IN: regulation of timing of transition from vegetative to reproductive phase; LOCATED IN: intracellular, nucleus; EXPRESSED IN: 28 plant structures; EXPRESSED DURING: 13 growth stages; CONTAINS InterPro DOMAIN/s: RNA-processing protein, HAT helix (InterPro:IPR003107), Tetratricopeptide-like helical (InterPro:IPR011990), Suppressor of forked (InterPro:IPR0088…	AT1G04080.1	2e-171	3738.45	2291.46	5185.45	1.1782	3.55489e-05	0.0028992	1.1782
comp113433	Member of the R2R3-myb factor gene family.	AT4G37260.1	7e-12	2422.63	1285.31	3559.96	1.46974	5.47472e-08	1.26999e-05	1.46974
comp113477				27.1933	2.63785	51.7488	4.29409	7.59929e-07	0.000119992	4.29409
comp113543				887.095	514.253	1259.94	1.2928	6.52903e-05	0.00468165	1.2928
comp113579	Calcium-dependent lipid-binding (CaLB domain) plant phosphoribosyltransferase family protein; FUNCTIONS IN: molecular_function unknown; INVOLVED IN: tryptophan biosynthetic process; LOCATED IN: endoplasmic reticulum, cell wall; EXPRESSED IN: 24 plant structures; EXPRESSED DURING: 13 growth stages; CONTAINS InterPro DOMAIN/s: C2 membrane targeting protein (InterPro:IPR018029), C2 calcium/lipid-bin…	AT3G57880.1	0	3879.65	2100.21	5659.08	1.43003	3.35629e-07	6.22033e-05	1.43003
comp113583	subunit F of photosystem I	AT1G31330.1	1e-75	2205.66	3233.89	1177.44	-1.45762	1.21331e-05	0.00117417	1.45762
comp113588	Encodes the FAd subunit of mitochondrial F1F0-ATP synthase. Essential for pollen formation.	AT2G21870.1	6e-22	1970.39	2719.63	1221.15	-1.15518	4.0201e-05	0.00317726	1.15518
comp113620	chlorophyll a/b-binding protein that is more similar to the PSI Cab proteins than the PSII cab proteins. The predicted protein is about 20 amino acids shorter than most known Cab proteins.	AT3G47470.1	3e-113	2516.63	3423.11	1610.15	-1.08811	8.88812e-05	0.0060161	1.08811
comp113654	encodes a member of HECT ubiquitin protein ligase family that is involved in trichome cell morphogenesis. Mutants in this gene exhibit supernumerary trichome branches and increased DNA content.	AT4G38600.1	0	3123.72	1463.18	4784.26	1.70919	3.21084e-09	1.11356e-06	1.70919
comp113677	Encodes a Serine/arginine-rich (SR) protein RSZp22. SR proteins are splicing regulators that share a modular structure consisting of one or two N-terminal RNA recognition motif domains and a C-terminal RS-rich domain. RSZp22 is located in the nucleolus. It is a nucleocytoplasmic shuttling protein and an interacting partner to the Arabidopsis U1-70K. Barta et al (2010) have proposed a nomenclature…	AT4G31580.2	5e-34	518.743	186.642	850.843	2.18862	5.92985e-13	5.96569e-10	2.18862
comp113707	Eukaryotic aspartyl protease family protein; FUNCTIONS IN: aspartic-type endopeptidase activity; INVOLVED IN: proteolysis; CONTAINS InterPro DOMAIN/s: Peptidase aspartic (InterPro:IPR021109), Peptidase aspartic, catalytic (InterPro:IPR009007), Peptidase A1 (InterPro:IPR001461); BEST Arabidopsis thaliana protein match is: Eukaryotic aspartyl protease family protein (TAIR:AT2G42980.1); Has 2947 Bla…	AT3G25700.1	9e-68	1550.31	881.341	2219.29	1.33232	2.35873e-06	0.000306006	1.33232
comp113739	leo1-like family protein; Encodes highly hydrophilic protein involved in positively regulating FLC expression. Mutants are early flowering and show a loss of FLC expression in the absence of cold.	AT5G61150.2	3e-94	1682.21	943.928	2420.5	1.35856	4.51233e-06	0.000528622	1.35856
comp113758	cell division cycle protein, a member of AAA-type ATPases gene family. Expressed throughout the plant in regions of cell division. Within the cell, sub-cellular localization varies depending on the stage of the cell cycle.Mutants in which the expression of CDC48A is altered show defects in cytokinesis, cell expansion and cell differentiation.	AT3G09840.1	1e-110	607.089	186.495	1027.68	2.46218	2.39163e-16	3.64235e-13	2.46218
comp113855	Seed maturation protein; CONTAINS InterPro DOMAIN/s: Seed maturation protein (InterPro:IPR007011); BEST Arabidopsis thaliana protein match is: Seed maturation protein (TAIR:AT3G22490.1); Has 1807 Blast hits to 1807 proteins in 277 species: Archae - 0; Bacteria - 0; Metazoa - 736; Fungi - 347; Plants - 385; Viruses - 0; Other Eukaryotes - 339 (source: NCBI BLink).	AT5G27980.1	3e-13	870.018	523.384	1216.65	1.21697	7.61275e-07	0.000119992	1.21697	yes
comp113901	CONTAINS InterPro DOMAIN/s: Prefoldin (InterPro:IPR009053); BEST Arabidopsis thaliana protein match is: unknown protein (TAIR:AT1G24460.1); Has 194354 Blast hits to 66887 proteins in 3244 species: Archae - 3688; Bacteria - 38556; Metazoa - 84828; Fungi - 17265; Plants - 10589; Viruses - 805; Other Eukaryotes - 38623 (source: NCBI BLink).	AT4G31570.1	4e-67	2063.77	985.262	3142.28	1.67323	1.30206e-08	3.78327e-06	1.67323
comp113959	protein with putative sucrose-phosphate synthase activity.	AT1G04920.1	0	3430.05	1885.42	4974.68	1.39972	5.76313e-07	9.54473e-05	1.39972
comp113980	Similar to POL2A, DNA polymerase epsilon catalytic subunit. Essential for Arabidopsis growth. Null homozygotes are embryo lethal, partial loss of function alleles show embryo patterning defects such as root pole displacement. Delayed progression through cell cycle results in embryos with smaller numbers of larger cells.	AT1G08260.1	0	3662.57	1494.44	5830.7	1.96406	1.41102e-11	9.4143e-09	1.96406
comp113990	hydroxyproline-rich glycoprotein family protein; Has 15375 Blast hits to 12179 proteins in 920 species: Archae - 8; Bacteria - 1425; Metazoa - 5915; Fungi - 2848; Plants - 1527; Viruses - 230; Other Eukaryotes - 3422 (source: NCBI BLink).	AT1G53645.1	3e-26	2965.12	1683.3	4246.94	1.33514	2.76369e-06	0.000343286	1.33514
comp114074	member of SMC subfamily; required for efficient homologous recombination	AT5G48600.2	0	3272.84	1894.51	4651.18	1.29577	1.15983e-05	0.00113008	1.29577
comp114079	glycine-tRNA ligase	AT3G48110.1	0	2011.94	1169.05	2854.83	1.28806	8.99648e-05	0.0060777	1.28806
comp114140	Major facilitator superfamily protein; FUNCTIONS IN: carbohydrate transmembrane transporter activity, sugar:hydrogen symporter activity; INVOLVED IN: transport, transmembrane transport; LOCATED IN: integral to membrane, membrane; EXPRESSED IN: 22 plant structures; EXPRESSED DURING: 13 growth stages; CONTAINS InterPro DOMAIN/s: Sugar transporter, conserved site (InterPro:IPR005829), Major facilita…	AT1G67300.1	9e-158	1465.62	948.213	1983.02	1.06442	0.000108511	0.00703226	1.06442
comp114153	EMBRYO DEFECTIVE 2765 (EMB2765); LOCATED IN: plasma membrane, chloroplast; EXPRESSED IN: 24 plant structures; EXPRESSED DURING: 13 growth stages; BEST Arabidopsis thaliana protein match is: RNA helicase, putative (TAIR:AT5G47010.1); Has 4121 Blast hits to 3614 proteins in 689 species: Archae - 125; Bacteria - 655; Metazoa - 959; Fungi - 1056; Plants - 630; Viruses - 0; Other Eukaryotes - 696 (sou…	AT2G38770.1	0	2807.67	1465.96	4149.38	1.50105	2.34665e-07	4.65282e-05	1.50105
comp114164	Membrane-bound protein serine/threonine kinase that functions as blue light photoreceptor in redundancy with PHO1. Involved in stomatal opening, chloroplast movement and phototropism. Mediates blue light-induced growth enhancements. PHOT1 and PHOT2 mediate blue light-dependent activation of the plasma membrane H+-ATPase in guard cell protoplasts. PHOT2 possesses two LOV (LOV1 and LOV2, for light-…	AT5G58140.1	0	2704.78	1568.63	3840.93	1.29195	1.15598e-05	0.00112791	1.29195
comp114177				3129.34	1891.77	4366.9	1.20687	5.38068e-05	0.00401009	1.20687
comp114186	K efflux antiporter KEA1	AT1G01790.1	0	3271.09	1703.33	4838.85	1.50631	2.51927e-07	4.84863e-05	1.50631
comp114187	Required for nonsense-mediated mRNA decay. Involved in RNA interference. lba1 mutants has reduced sugar-induced expression of Atb- amylase, is hypersensitive to glucose and abscisic acid and resistant to mannose, and shows early flowering, short day-sensitive growth, and seed germination phenotypes.	AT5G47010.1	0	2640.64	1412.16	3869.12	1.4541	7.84725e-07	0.000123262	1.4541
comp114220	ICU2; DNA polymerase alpha catalytic subunit. Interacts with genes involved in chromatin-mediated cellular memory. ICU2 genetically interacts with TERMINAL FLOWER2, the ortholog of HETEROCHROMATIN PROTEIN1 of animals and yeasts, and with the Polycomb group (PcG) gene CURLY LEAF. A number of regulatory genes were derepressed in the icu2-1 mutant, including genes associated with flowering time, flo…	AT5G67100.1	0	2026.83	1031.95	3021.7	1.54999	2.38565e-07	4.69464e-05	1.54999
comp114224				2725.46	1663.85	3787.08	1.18656	5.1923e-05	0.00388624	1.18656
comp114240	member of MRP subfamily	AT3G62700.1	0	3479.88	1864.65	5095.11	1.45021	1.23876e-06	0.000181175	1.45021	yes
comp114246	coatomer gamma-2 subunit, putative / gamma-2 coat protein, putative / gamma-2 COP, putative; FUNCTIONS IN: clathrin binding, structural molecule activity, binding; INVOLVED IN: intracellular protein transport, vesicle-mediated transport; LOCATED IN: chloroplast, membrane; EXPRESSED IN: 26 plant structures; EXPRESSED DURING: 15 growth stages; CONTAINS InterPro DOMAIN/s: Coatomer, gamma subunit, ap…	AT4G34450.1	1e-97	379.604	60.2124	698.996	3.53715	3.22926e-27	3.23185e-23	3.53715
comp114251	unknown protein	AT1G47640.1	2e-106	1611.8	2390.56	833.045	-1.52088	3.68994e-05	0.00298588	1.52088
comp114259	GDSL-like Lipase/Acylhydrolase superfamily protein; FUNCTIONS IN: hydrolase activity, acting on ester bonds, carboxylesterase activity; INVOLVED IN: lipid metabolic process; LOCATED IN: endomembrane system; EXPRESSED IN: 18 plant structures; EXPRESSED DURING: 13 growth stages; CONTAINS InterPro DOMAIN/s: Lipase, GDSL (InterPro:IPR001087); BEST Arabidopsis thaliana protein match is: GDSL-like Lipa…	AT4G01130.1	5e-58	1860.16	2515.11	1205.21	-1.06133	0.000114682	0.00731711	1.06133	yes
comp114282	cohesin complex that is essential for viability and sister chromatid alignment.	AT3G54670.3	0	1498.86	877.661	2120.05	1.27236	1.92102e-05	0.00172855	1.27236	yes
comp114300	embryo defective 1507 (emb1507); FUNCTIONS IN: in 6 functions; INVOLVED IN: embryo development ending in seed dormancy; EXPRESSED IN: 24 plant structures; EXPRESSED DURING: 13 growth stages; CONTAINS InterPro DOMAIN/s: ATPase, AAA+ type, core (InterPro:IPR003593), DNA/RNA helicase, DEAD/DEAH box type, N-terminal (InterPro:IPR011545), Sec63 domain (InterPro:IPR004179), Sec63 domain, subgroup (Inte…	AT1G20960.2	0	2665.33	1559.85	3770.82	1.27348	1.0801e-05	0.00106875	1.27348	yes
comp114335	transducin family protein / WD-40 repeat family protein; CONTAINS InterPro DOMAIN/s: WD40 repeat 2 (InterPro:IPR019782), WD40 repeat, conserved site (InterPro:IPR019775), WD40 repeat (InterPro:IPR001680), WD40 repeat-like-containing domain (InterPro:IPR011046), Protein of unknown function DUF3639 (InterPro:IPR022100), WD40-repeat-containing domain (InterPro:IPR017986), WD40/YVTN repeat-like-conta…	AT3G42660.1	0	1257.17	773.541	1740.79	1.17019	6.72149e-05	0.004766	1.17019
comp114359	NAD(P)-binding Rossmann-fold superfamily protein; FUNCTIONS IN: binding, catalytic activity; INVOLVED IN: metabolic process; LOCATED IN: chloroplast thylakoid membrane, chloroplast, plastoglobule, chloroplast envelope; EXPRESSED IN: 21 plant structures; EXPRESSED DURING: 13 growth stages; CONTAINS InterPro DOMAIN/s: NAD(P)-binding domain (InterPro:IPR016040), NmrA-like (InterPro:IPR008030); BEST …	AT2G34460.1	1e-38	1370.02	678.402	2061.63	1.60357	1.83213e-08	5.09332e-06	1.60357	yes
comp114494	maternal effect embryo arrest 59 (MEE59)	AT4G37300.1	1e-13	1348.32	1961.59	735.044	-1.41612	0.000104096	0.00679008	1.41612
comp114527	Lactoylglutathione lyase / glyoxalase I family protein	AT5G48480.1	3e-18	1234.53	1730.51	738.558	-1.22841	7.07867e-05	0.004964	1.22841	yes
comp114561				334.625	144.366	524.884	1.86226	1.41219e-09	5.49626e-07	1.86226
comp114719	Encodes KEEP ON GOING (KEG), a RING E3 ligase involved in abscisic acid signaling. KEG is essential for Arabidopsis growth and development. ABA promotes KEG degradation via the ubiquitin dependent 26S proteasome pathway.	AT5G13530.1	0	1842.68	788.53	2896.84	1.87724	2.09789e-10	1.00664e-07	1.87724
comp114738	isolated from differential screening of a cDNA library from auxin-treated root culture. encodes a protein similar to subtilisin-like serine protease which is believed to be active outside the plant cell.	AT2G04160.1	0	1287.17	800.905	1773.44	1.14685	7.96235e-05	0.00544205	1.14685
comp114743	major actin filament bundling protein that is involved in root hair growth through regulating actin organization in a Ca2+-dependent manner.	AT4G30160.1	0	1568.59	950.81	2186.37	1.20131	2.4243e-05	0.00209675	1.20131
comp114755	Protein kinase family protein; FUNCTIONS IN: protein serine/threonine kinase activity, protein kinase activity, kinase activity, ATP binding; INVOLVED IN: protein amino acid phosphorylation; LOCATED IN: cellular_component unknown; EXPRESSED IN: 24 plant structures; EXPRESSED DURING: 15 growth stages; CONTAINS InterPro DOMAIN/s: Protein kinase, ATP binding site (InterPro:IPR017441), Protein kinase…	AT5G18190.1	1e-125	561.623	122.46	1000.79	3.03075	3.46598e-22	1.86779e-18	3.03075
comp114796	Actin-binding FH2 (formin homology 2) family protein; FUNCTIONS IN: actin binding; INVOLVED IN: cellular component organization, actin cytoskeleton organization; LOCATED IN: endomembrane system; EXPRESSED IN: 20 plant structures; EXPRESSED DURING: 11 growth stages; CONTAINS InterPro DOMAIN/s: Actin-binding FH2/DRF autoregulatory (InterPro:IPR003104), Actin-binding FH2 (InterPro:IPR015425); BEST A…	AT3G05470.1	4e-100	1213.33	575.585	1851.08	1.68526	2.59421e-08	7.017e-06	1.68526
comp114817	MSL4; mechanosensitive channel of small conductance-like 4 (MSL4); INVOLVED IN: transmembrane transport; LOCATED IN: plasma membrane, membrane; CONTAINS InterPro DOMAIN/s: Membrane protein, At2g17000, predicted (InterPro:IPR016688), Mechanosensitive ion channel MscS (InterPro:IPR006685), Like-Sm ribonucleoprotein (LSM)-related domain (InterPro:IPR010920); BEST Arabidopsis thaliana protein match i…	AT1G53470.1	2e-166	921.947	276.628	1567.27	2.50223	1.19396e-16	1.99153e-13	2.50223
comp114824	Confers resistance to UV radiation. Homolog of the human xeroderma pigmentosum group F DNA repair and yeast Rad1 proteins	AT5G41150.1	7e-179	1118.94	644.101	1593.78	1.30709	1.63975e-05	0.00150556	1.30709
comp114869	origin of replication complex 1a subunit.The protein contains a PHD domain,binds methylated DNA and appears to function as a transcriptional activator.	AT4G14700.1	0	1339.46	827.866	1851.05	1.16087	0.000129074	0.00806637	1.16087
comp114886	SMC2-1 (SMC2) required for efficient homologous recombination	AT5G62410.1	0	2653.07	1547.46	3758.68	1.28033	1.48319e-05	0.00138727	1.28033
comp114906	unknown protein; BEST Arabidopsis thaliana protein match is: unknown protein (TAIR:AT2G41960.1); Has 13384 Blast hits to 8116 proteins in 546 species: Archae - 41; Bacteria - 766; Metazoa - 5596; Fungi - 1431; Plants - 589; Viruses - 46; Other Eukaryotes - 4915 (source: NCBI BLink).	AT3G58050.1	2e-162	1776.07	962.006	2590.14	1.42891	1.79371e-06	0.000247363	1.42891
comp114913	RNA recognition motif (RRM)-containing protein; FUNCTIONS IN: RNA binding, nucleotide binding, nucleic acid binding; INVOLVED IN: RNA processing; EXPRESSED IN: 23 plant structures; EXPRESSED DURING: 13 growth stages; CONTAINS InterPro DOMAIN/s: RNA polymerase II, large subunit, CTD (InterPro:IPR006569), mRNA splicing factor, Cwf21 (InterPro:IPR013170), ENTH/VHS (InterPro:IPR008942), SWAP/Surp (In…	AT5G25060.1	0	1601.35	990.297	2212.41	1.15968	0.00012509	0.00787357	1.15968
comp114935	AAA-type ATPase family protein; FUNCTIONS IN: nucleoside-triphosphatase activity, ATPase activity, nucleotide binding, ATP binding; LOCATED IN: chloroplast; EXPRESSED IN: 24 plant structures; EXPRESSED DURING: 14 growth stages; CONTAINS InterPro DOMAIN/s: ATPase, AAA+ type, core (InterPro:IPR003593), ATPase, AAA-type, core (InterPro:IPR003959), SMAD/FHA domain (InterPro:IPR008984), ATPase, AAA-ty…	AT4G02480.1	0	2326.2	1351.78	3300.61	1.28788	1.17233e-05	0.00113909	1.28788
comp114945	heat shock protein 70 (Hsc70-5); nuclear	AT5G09590.1	5e-25	240.45	59.0386	421.862	2.83704	2.30452e-17	4.36339e-14	2.83704
comp114948	SUPPRESSOR OF AUXIN RESISTANCE1 (SAR1); INVOLVED IN: mRNA export from nucleus, response to auxin stimulus, developmental process; LOCATED IN: nuclear membrane; EXPRESSED IN: 21 plant structures; EXPRESSED DURING: 13 growth stages; CONTAINS InterPro DOMAIN/s: Nucleoporin Nup120/160 (InterPro:IPR021717).	AT1G33410.2	0	1971.12	1009.8	2932.44	1.53803	2.49053e-07	4.83104e-05	1.53803
comp114999	H(+)-ATPase 11 (HA11); FUNCTIONS IN: ATPase activity; INVOLVED IN: cation transport, metabolic process, ATP biosynthetic process; LOCATED IN: plasma membrane, membrane; EXPRESSED IN: 26 plant structures; EXPRESSED DURING: 14 growth stages; CONTAINS InterPro DOMAIN/s: ATPase, P-type, ATPase-associated domain (InterPro:IPR008250), ATPase, P-type cation-transporter, N-terminal (InterPro:IPR004014), …	AT5G62670.1	0	1424.31	709.44	2139.18	1.5923	1.08103e-07	2.37407e-05	1.5923
comp115019	A member of Arabidopsis BAG (Bcl-2-associated athanogene) proteins, plant homologs of mammalian regulators of apoptosis. Expression of BAG6 in leaves was strongly induced by heat stress. Knockout mutants exhibited enhanced susceptibility to fungal pathogen Botrytis cinerea. Plant BAG proteins are multi-functional and remarkably similar to their animal counterparts, as they regulate apoptotic-like…	AT2G46240.1	3e-17	2443.71	1409.35	3478.07	1.30326	1.30958e-05	0.00125162	1.30326
comp115021	early-responsive to dehydration 3 (ERD3); CONTAINS InterPro DOMAIN/s: Protein of unknown function DUF248, methyltransferase putative (InterPro:IPR004159); BEST Arabidopsis thaliana protein match is: S-adenosyl-L-methionine-dependent methyltransferases superfamily protein (TAIR:AT1G31850.2); Has 1146 Blast hits to 1130 proteins in 105 species: Archae - 6; Bacteria - 157; Metazoa - 0; Fungi - 3; Pl…	AT4G19120.2	3e-66	211.179	104.189	318.17	1.6106	2.94542e-06	0.000362007	1.6106
comp115022				289.736	138.303	441.169	1.6735	2.68897e-07	5.11897e-05	1.6735
comp115106	AtrbohD gene to fine tune the spatial control of ROI production and hypersensitive response to cell in and around infection site.	AT1G64060.1	0	1168.98	656.467	1681.48	1.35694	6.13527e-06	0.000675805	1.35694
comp115165				754.944	471.786	1038.1	1.13774	0.000167674	0.00992945	1.13774
comp115257	embryo defective 3012 (EMB3012); FUNCTIONS IN: molecular_function unknown; INVOLVED IN: embryo development ending in seed dormancy; LOCATED IN: endomembrane system; EXPRESSED IN: 24 plant structures; EXPRESSED DURING: 13 growth stages; CONTAINS InterPro DOMAIN/s: Invasin/intimin cell-adhesion (InterPro:IPR008964), Bacterial Ig-like, group 2 (InterPro:IPR003343); Has 264 Blast hits to 238 proteins…	AT5G40480.1	0	1274.69	562.39	1987	1.82095	1.51622e-09	5.86854e-07	1.82095
comp115297	XLG3 (extra-large G protein 3) that shows significant similarity to the G protein alpha subunit in its C terminal region. Involved in the regulation of root morphological and growth responses.	AT1G31930.3	0	985.656	614.869	1356.44	1.14147	0.000102118	0.00669904	1.14147
comp115365	MET1 cytosine methyltransferase MET1. Required for silencing of FWA paternal allele in endosperm. Two lines with RNAi constructs directed against DMT1 have reduced agrobacterium-mediated tumor formation.	AT5G49160.1	0	1919.15	886.901	2951.4	1.73455	4.39775e-09	1.45325e-06	1.73455
comp115376	unknown protein; FUNCTIONS IN: molecular_function unknown; INVOLVED IN: biological_process unknown; LOCATED IN: endomembrane system; EXPRESSED IN: 21 plant structures; EXPRESSED DURING: 13 growth stages; Has 210 Blast hits to 148 proteins in 42 species: Archae - 0; Bacteria - 118; Metazoa - 0; Fungi - 0; Plants - 48; Viruses - 0; Other Eukaryotes - 44 (source: NCBI BLink).	AT3G48200.1	5e-115	904.716	529.135	1280.3	1.27477	8.07091e-05	0.00549481	1.27477
comp115393				132.818	10.2272	255.409	4.64233	1.5936e-21	7.44274e-18	4.64233
comp115405	Protein kinase superfamily protein; FUNCTIONS IN: kinase activity; INVOLVED IN: protein amino acid phosphorylation; LOCATED IN: cytosol, plasma membrane; EXPRESSED IN: cultured cell; CONTAINS InterPro DOMAIN/s: Serine/threonine-protein kinase domain (InterPro:IPR002290), Serine/threonine-protein kinase-like domain (InterPro:IPR017442), AGC-kinase, C-terminal (InterPro:IPR000961), Serine/threonine…	AT3G17850.1	0	1711.74	704.345	2719.14	1.9488	2.83663e-11	1.66994e-08	1.9488
comp115447	YLMG2; FUNCTIONS IN: molecular_function unknown; INVOLVED IN: biological_process unknown; LOCATED IN: chloroplast, membrane; CONTAINS InterPro DOMAIN/s: Protein of unknown function YGGT (InterPro:IPR003425); BEST Arabidopsis thaliana protein match is: YGGT family protein (TAIR:AT4G27990.1).	AT5G21920.2	8e-48	852.774	1187.49	518.062	-1.19671	4.50948e-05	0.00347546	1.19671
comp115458	P-loop nucleoside triphosphate hydrolases superfamily protein with CH (Calponin Homology) domain; FUNCTIONS IN: microtubule motor activity, ATP binding; INVOLVED IN: microtubule-based movement; EXPRESSED IN: 21 plant structures; EXPRESSED DURING: 12 growth stages; CONTAINS InterPro DOMAIN/s: Calponin-homology (InterPro:IPR016146), Calponin-like actin-binding (InterPro:IPR001715), Kinesin, motor d…	AT2G47500.1	0	1692.8	957.318	2428.29	1.34287	3.90372e-06	0.000463524	1.34287
comp115510	Leucine-rich repeat (LRR) family protein; FUNCTIONS IN: structural constituent of cell wall; LOCATED IN: cell wall, plant-type cell wall; EXPRESSED IN: 22 plant structures; EXPRESSED DURING: 13 growth stages; CONTAINS InterPro DOMAIN/s: Leucine-rich repeat-containing N-terminal domain, type 2 (InterPro:IPR013210), Leucine-rich repeat (InterPro:IPR001611); BEST Arabidopsis thaliana protein match i…	AT3G24480.1	7e-106	488.373	226.7	750.045	1.72619	5.23681e-07	8.90461e-05	1.72619
comp115629	HXXXD-type acyl-transferase family protein; FUNCTIONS IN: transferase activity, transferring acyl groups other than amino-acyl groups, transferase activity; INVOLVED IN: biological_process unknown; EXPRESSED IN: 19 plant structures; EXPRESSED DURING: 13 growth stages; CONTAINS InterPro DOMAIN/s: Transferase (InterPro:IPR003480); BEST Arabidopsis thaliana protein match is: HXXXD-type acyl-transfer…	AT3G50270.1	4e-37	336.231	205.095	467.367	1.18826	8.51236e-05	0.00576733	1.18826
comp115663	TPR tetratricopeptide repeat domain containing protein that shows sequence similarity to those of transcriptional repressors in other organisms. Involved in mediating effector-triggered immunity.	AT4G37460.1	0	663.881	276.038	1051.72	1.92982	2.04995e-10	9.97298e-08	1.92982
comp115667	P-loop containing nucleoside triphosphate hydrolases superfamily protein; FUNCTIONS IN: helicase activity, nucleic acid binding, ATP-dependent helicase activity, ATP binding; EXPRESSED IN: 25 plant structures; EXPRESSED DURING: 14 growth stages; CONTAINS InterPro DOMAIN/s: DNA/RNA helicase, DEAD/DEAH box type, N-terminal (InterPro:IPR011545), RNA helicase, DEAD-box type, Q motif (InterPro:IPR0140…	AT1G20920.1	0	1131.52	676.538	1586.5	1.2296	8.12211e-05	0.00552429	1.2296
comp115766	RING-type E3 ubiquitin ligase implicated in gametogenesis. Double mutant analyses with RHF1a suggests that RHF2a may be involved in targetting ICK4KRP6 for degradation following meiosis in order to allow the mitoses associated with megagametogenesis and microgametogenesis to occur. RHF2a is expressed in all four floral whorls and is present at ~8-fold higher levels than RHF1a in inflorescences by…	AT5G22000.2	4e-31	306.673	170.4	442.947	1.37821	6.01273e-07	9.91125e-05	1.37821
comp115787	set1 ash2 histone methyltransferase complex subunit ash2; Nuclear protein required for early embryogenesis. Encodes a structural core component of a COMPASS-like H3K4 histone methylation complex that is also involved in the timing of the floral transition and in leaf morphogenesis. Mutants are decreased in H3K4 histone trimethylation.	AT1G51450.1	6e-98	978.66	578.821	1378.5	1.25191	2.03072e-05	0.00180309	1.25191
comp115789				804.105	1206.56	401.645	-1.58691	9.35938e-06	0.000964236	1.58691
comp115851	Protein kinase superfamily protein; FUNCTIONS IN: protein serine/threonine kinase activity, protein kinase activity, kinase activity, ATP binding; INVOLVED IN: protein amino acid phosphorylation; LOCATED IN: cellular_component unknown; EXPRESSED IN: sperm cell, stamen; EXPRESSED DURING: 4 anthesis; CONTAINS InterPro DOMAIN/s: Protein kinase, ATP binding site (InterPro:IPR017441), Serine/threonine…	AT5G24080.1	1e-94	638.413	365.343	911.484	1.31897	1.41642e-05	0.00133552	1.31897
comp115970	XRN4 Involved in the ethylene response. XRN4 does not appear to regulate ethylene signaling via an RNA-INDUCED SILENCING COMPLEX-based RNA silencing mechanism but acts by independent means. Endogenous suppressor of posttranscriptional gene silencing.	AT1G54490.1	0	1235.71	664.99	1806.44	1.44174	1.854e-06	0.000252692	1.44174
comp116041	SAP domain-containing protein; FUNCTIONS IN: DNA binding, nucleic acid binding; LOCATED IN: nucleus; CONTAINS InterPro DOMAIN/s: DNA-binding SAP (InterPro:IPR003034); Has 1807 Blast hits to 1807 proteins in 277 species: Archae - 0; Bacteria - 0; Metazoa - 736; Fungi - 347; Plants - 385; Viruses - 0; Other Eukaryotes - 339 (source: NCBI BLink).	AT5G66840.1	3e-49	584.278	350.568	817.989	1.22239	4.77087e-05	0.0036448	1.22239
comp116097	Protein kinase superfamily protein with octicosapeptide/Phox/Bem1p domain; FUNCTIONS IN: protein serine/threonine/tyrosine kinase activity, protein kinase activity; INVOLVED IN: protein amino acid phosphorylation; LOCATED IN: cellular_component unknown; EXPRESSED IN: 24 plant structures; EXPRESSED DURING: 15 growth stages; CONTAINS InterPro DOMAIN/s: Octicosapeptide/Phox/Bem1p (InterPro:IPR000270…	AT5G57610.1	8e-148	1074.13	545.124	1603.14	1.55624	2.28173e-07	4.55411e-05	1.55624
comp116132				592.685	882.432	302.938	-1.54246	5.85831e-08	1.35003e-05	1.54246
comp116140				444.887	228.818	660.956	1.53035	9.6197e-07	0.000146823	1.53035
comp116141				137.236	23.7137	250.758	3.4025	7.81179e-18	1.7102e-14	3.4025
comp116150				869.738	512.622	1226.85	1.259	7.92749e-06	0.000825213	1.259
comp116304				62.6022	6.38794	118.816	4.21724	3.21092e-17	5.91958e-14	4.21724
comp116305	Protein of unknown function (DUF581)	AT1G22160.1	1e-12	533.46	729.289	337.631	-1.11104	3.11011e-05	0.00259075	1.11104
comp116331	Remorin family protein	AT3G61260.1	3e-19	559.023	809.163	308.883	-1.38937	0.000169059	0.0099946	1.38937
comp116381				10.1402	0	20.2805	Inf	2.12672e-06	0.000280834	Inf
comp116421	Encodes a plasma membrane localized ATPase transporter involved in multidrug transport. The expression of this gene is upregulated by herbicide safeners such as benoxacor, fluxofenim and fenclorim.	AT2G47800.1	0	1280.21	602.609	1957.8	1.69994	1.72351e-08	4.8297e-06	1.69994
comp116433	Encodes a putative serine/threonine kinase (SIK1).	AT1G69220.1	0	645.139	374.953	915.325	1.28758	9.65845e-06	0.00098671	1.28758
comp116437				171.673	29.4243	313.922	3.41533	4.28559e-21	1.76606e-17	3.41533
comp116578				105.704	9.8187	201.589	4.35974	6.50577e-24	5.06409e-20	4.35974
comp116656	Protein kinase protein with adenine nucleotide alpha hydrolases-like domain; FUNCTIONS IN: protein tyrosine kinase activity, protein kinase activity, kinase activity, ATP binding; INVOLVED IN: protein amino acid phosphorylation; LOCATED IN: cellular_component unknown; EXPRESSED IN: 23 plant structures; EXPRESSED DURING: 13 growth stages; CONTAINS InterPro DOMAIN/s: Protein kinase, catalytic domai…	AT3G13690.1	0	602.943	287.088	918.797	1.67825	2.85411e-08	7.51682e-06	1.67825
comp116768	PROTON GRADIENT REGULATION 5	AT2G05620.1	8e-45	473.714	698.631	248.797	-1.48956	7.44e-05	0.00515651	1.48956
comp116790	Pentatricopeptide repeat (PPR) superfamily protein; CONTAINS InterPro DOMAIN/s: Pentatricopeptide repeat (InterPro:IPR002885); BEST Arabidopsis thaliana protein match is: Pentatricopeptide repeat (PPR) superfamily protein (TAIR:AT4G13650.1); Has 73401 Blast hits to 14698 proteins in 289 species: Archae - 0; Bacteria - 19; Metazoa - 251; Fungi - 280; Plants - 71776; Viruses - 0; Other Eukaryotes -…	AT3G09040.1	1e-89	397.702	230.927	564.477	1.28948	8.26486e-05	0.00561594	1.28948
comp116986	GRAS family transcription factor; CONTAINS InterPro DOMAIN/s: Transcription factor GRAS (InterPro:IPR005202); BEST Arabidopsis thaliana protein match is: GRAS family transcription factor (TAIR:AT3G50650.1); Has 1807 Blast hits to 1807 proteins in 277 species: Archae - 0; Bacteria - 0; Metazoa - 736; Fungi - 347; Plants - 385; Viruses - 0; Other Eukaryotes - 339 (source: NCBI BLink).	AT5G66770.1	1e-87	468.079	276.078	660.08	1.25756	9.13517e-05	0.00614727	1.25756
comp117007	ABC transporter family involved in ABA transport and resistance to lead. Localizes to plasma membrane. Upregulated by lead. Expressed in leaves, flowers, stomata and roots.	AT1G15520.1	9e-99	1079.61	568.401	1590.83	1.4848	8.47174e-07	0.000131596	1.4848
comp117285	protein that interacts with the 26S proteasome. Mutants are phenotypically indistinguishable from wild type plants under a variety of growth conditions. Protein levels increase upon exposure of seedlings to MG132, a specific, potent, reversible, and cell-permeable proteasome inhibitor.	AT3G13330.1	0	1187.11	727.089	1647.14	1.17976	0.000111593	0.00716783	1.17976
comp117308				548.38	767.483	329.276	-1.22084	1.54531e-05	0.00143199	1.22084
comp117485	aminophospholipid translocase (p-type ATPase) involved in chilling response. It is targeted to the plasma membrane following association in the endoplasmic reticulum with an ALIS protein beta-subunit.	AT5G04930.1	0	858.174	507.697	1208.65	1.25136	6.38549e-05	0.00460228	1.25136
comp117617	glycoside hydrolase family 2 protein; FUNCTIONS IN: carbohydrate binding, cation binding, beta-galactosidase activity, hydrolase activity, hydrolyzing O-glycosyl compounds, catalytic activity; INVOLVED IN: carbohydrate metabolic process; LOCATED IN: chloroplast; EXPRESSED IN: male gametophyte, guard cell; CONTAINS InterPro DOMAIN/s: Glycoside hydrolase family 2, immunoglobulin-like beta-sandwich …	AT3G54440.1	0	658.875	393.435	924.316	1.23226	4.81642e-05	0.00367559	1.23226
comp117746	Plant protein of unknown function (DUF869); FUNCTIONS IN: molecular_function unknown; INVOLVED IN: biological_process unknown; EXPRESSED IN: 22 plant structures; EXPRESSED DURING: 13 growth stages; CONTAINS InterPro DOMAIN/s: Protein of unknown function DUF869, plant (InterPro:IPR008587); BEST Arabidopsis thaliana protein match is: Plant protein of unknown function (DUF869) (TAIR:AT1G47900.2).	AT1G19835.2	7e-70	660.506	259.656	1061.36	2.03124	3.38768e-11	1.96138e-08	2.03124
comp117757				54.439	13.4119	95.4661	2.83148	7.33689e-07	0.000116856	2.83148
comp118029				61.5292	14.9464	108.112	2.85465	1.80788e-09	6.80929e-07	2.85465
comp118143				50.7501	0.347701	101.153	8.18447	2.35484e-22	1.37475e-18	8.18447
comp118182				360.546	556.274	164.818	-1.75492	0.000103117	0.00673876	1.75492
comp118220	mechanosensitive channel of small conductance-like 6 (MSL6); INVOLVED IN: transmembrane transport; LOCATED IN: plasma membrane, membrane; EXPRESSED IN: 23 plant structures; EXPRESSED DURING: 13 growth stages; CONTAINS InterPro DOMAIN/s: Membrane protein, At2g17000, predicted (InterPro:IPR016688), Mechanosensitive ion channel MscS (InterPro:IPR006685), Like-Sm ribonucleoprotein (LSM)-related domai…	AT1G78610.1	7e-175	503.125	213.089	793.16	1.89615	3.75246e-10	1.75255e-07	1.89615	yes
comp118441	CONTAINS InterPro DOMAIN/s: Spt20 family (InterPro:IPR021950); Has 8778 Blast hits to 7244 proteins in 477 species: Archae - 6; Bacteria - 326; Metazoa - 4198; Fungi - 1506; Plants - 923; Viruses - 22; Other Eukaryotes - 1797 (source: NCBI BLink).	AT1G72390.1	5e-29	578.577	299.929	857.225	1.51505	4.71935e-07	8.20394e-05	1.51505
comp118849	Coatomer, alpha subunit; FUNCTIONS IN: structural molecule activity, transporter activity; INVOLVED IN: intracellular protein transport, vesicle-mediated transport, ER to Golgi vesicle-mediated transport; LOCATED IN: COPI vesicle coat, plasma membrane, CUL4 RING ubiquitin ligase complex, membrane; EXPRESSED IN: 25 plant structures; EXPRESSED DURING: 14 growth stages; CONTAINS InterPro DOMAIN/s: W…	AT1G62020.1	4e-96	95.6816	16.1886	175.175	3.43574	8.02354e-16	1.14714e-12	3.43574
comp118857	Leucine-rich repeat protein kinase family protein; FUNCTIONS IN: protein serine/threonine kinase activity, protein kinase activity, ATP binding; INVOLVED IN: transmembrane receptor protein tyrosine kinase signaling pathway, protein amino acid phosphorylation; LOCATED IN: mitochondrion; EXPRESSED IN: 15 plant structures; EXPRESSED DURING: 9 growth stages; CONTAINS InterPro DOMAIN/s: Protein kinase…	AT1G74360.1	2e-104	469.31	255.49	683.131	1.41889	7.48972e-06	0.000787838	1.41889
comp118877				209.224	395.201	23.2476	-4.08744	1.98875e-17	3.87011e-14	4.08744
comp119344				48.8726	14.6305	83.1147	2.50612	7.06111e-07	0.00011398	2.50612
comp119643				272.981	371.63	174.332	-1.09203	0.000115713	0.00737616	1.09203
comp119738	KAR-UP F-box 1 (KUF1)	AT1G31350.1	2e-32	281.121	390.245	171.996	-1.18201	9.16909e-05	0.00615868	1.18201	yes
comp120276				29.9754	3.56966	56.3812	3.98136	3.09602e-07	5.78386e-05	3.98136
comp120363				46.5436	3.44455	89.6426	4.7018	2.96177e-15	4.06843e-12	4.7018
comp120656				30.5286	1.1544	59.9029	5.69741	5.96092e-13	5.96569e-10	5.69741
comp120719				208.767	72.9972	344.537	2.23875	1.50193e-11	9.92633e-09	2.23875
comp121177	A member of Arabidopsis BAG (Bcl-2-associated athanogene) proteins, plant homologs of mammalian regulators of apoptosis. Expression of BAG6 in leaves was strongly induced by heat stress. Knockout mutants exhibited enhanced susceptibility to fungal pathogen Botrytis cinerea. Plant BAG proteins are multi-functional and remarkably similar to their animal counterparts, as they regulate apoptotic-like…	AT2G46240.1	9e-12	154.769	75.0745	234.463	1.64297	1.81428e-06	0.000248245	1.64297	yes
comp121250				164.616	78.2383	250.993	1.6817	5.23571e-06	0.00059255	1.6817
comp121894	Encodes a xyloglucan galactosyltransferase located in the membrane of Golgi stacks that is involved in the biosynthesis of fucose. It is also involved in endomembrane organization. It is suggested that it is a dual-function protein that is responsible for actin organization and the synthesis of cell wall materials.	AT2G20370.1	2e-94	237.806	136.757	338.854	1.30905	2.31375e-05	0.00201357	1.30905
comp124422				18.3257	4.10265	32.5488	2.98798	2.22449e-05	0.00194555	2.98798
comp124584	DREB subfamily A-2 of ERF/AP2 transcription factor family. The protein contains one AP2 domain. There are eight members in this subfamily including DREB2A AND DREB2B that are involved in response to drought.	AT1G75490.1	3e-26	61.4984	20.4026	102.594	2.33013	1.67997e-07	3.47173e-05	2.33013
comp125017				43.1544	12.9999	73.309	2.49549	1.67587e-06	0.000234384	2.49549
comp125482				68.8094	121.392	16.2268	-2.90322	1.32942e-05	0.00126885	2.90322
comp127280				31.7658	56.3752	7.15645	-2.97774	4.72799e-05	0.00361598	2.97774
comp128688				18.217	3.20815	33.2259	3.37249	8.87682e-06	0.000918574	3.37249
comp128713				15.1571	1.02445	29.2897	4.83747	3.82805e-07	6.92967e-05	4.83747
comp131407				14.0437	1.7247	26.3626	3.93407	1.93147e-05	0.00173254	3.93407
comp137779				24.102	5.96626	42.2378	2.82364	1.94694e-05	0.00174195	2.82364
comp139037				10.4797	1.13575	19.8237	4.12551	6.64752e-05	0.00474073	4.12551
comp155270				14.493	2.29015	26.6959	3.5431	4.02597e-05	0.00317726	3.5431
comp164510				12.368	1.94245	22.7935	3.55267	0.000110864	0.00714505	3.55267	yes
comp272792				10.3881	0	20.7762	Inf	5.28167e-06	0.000594876	Inf
comp31820				8.55934	0.347701	16.771	5.59197	0.000111937	0.00717463	5.59197	yes
comp35257	C2 calcium/lipid-binding plant phosphoribosyltransferase family protein; CONTAINS InterPro DOMAIN/s: C2 membrane targeting protein (InterPro:IPR018029), C2 calcium/lipid-binding domain, CaLB (InterPro:IPR008973), Phosphoribosyltransferase C-terminal (InterPro:IPR013583), C2 calcium-dependent membrane targeting (InterPro:IPR000008); BEST Arabidopsis thaliana protein match is: C2 calcium/lipid-bind…	AT1G04150.1	3e-26	22.2568	6.43011	38.0835	2.56625	0.000132866	0.00824452	2.56625
comp37548	Regulator of chromosome condensation (RCC1) family with FYVE zinc finger domain; FUNCTIONS IN: chromatin binding, zinc ion binding, Ran GTPase binding; EXPRESSED IN: 22 plant structures; EXPRESSED DURING: 13 growth stages; CONTAINS InterPro DOMAIN/s: Regulator of chromosome condensation, RCC1 (InterPro:IPR000408), Disease resistance/zinc finger/chromosome condensation-like region (InterPro:IPR013…	AT5G19420.1	0	493.996	246.986	741.007	1.58506	5.07593e-07	8.71566e-05	1.58506
comp37605	Encodes a putative transcription factor (MYB92).	AT5G10280.1	7e-32	84.9181	21.6683	148.168	2.77358	2.45229e-11	1.46835e-08	2.77358
comp37939	Encodes an RNase III-like enzyme that catalyzes processing of trans-acting small interfering RNA precursors in a distinct small RNA biogenesis pathway. The protein is also involved in the production of 21-nt primary siRNAs from both inverted-repeat constructs and endogenous sequences, as well as the RDR6-dependent 21-nt secondary siRNAs involved in long-range cell-to-cell signaling. It binds DRB4…	AT5G20320.1	2e-179	647.586	385.742	909.43	1.23732	5.5312e-05	0.00411352	1.23732
comp38076				26.5321	6.43011	46.6342	2.85847	6.55276e-06	0.000710619	2.85847
comp38095	GDSL-like Lipase/Acylhydrolase superfamily protein; FUNCTIONS IN: hydrolase activity, acting on ester bonds, carboxylesterase activity; INVOLVED IN: lipid metabolic process; LOCATED IN: endomembrane system; EXPRESSED IN: 10 plant structures; EXPRESSED DURING: 6 growth stages; CONTAINS InterPro DOMAIN/s: Lipase, GDSL (InterPro:IPR001087); BEST Arabidopsis thaliana protein match is: GDSL-like Lipas…	AT1G71691.2	1e-79	103.11	31.6721	174.549	2.46234	5.01576e-10	2.28171e-07	2.46234
comp38144	Alpha-Expansin Gene Family. Naming convention from the Expansin Working Group (Kende et al, 2004. Plant Mol Bio). Involved in the formation of nematode-induced syncytia in roots of Arabidopsis thaliana.	AT2G03090.1	3e-125	113.074	63.2338	162.914	1.36534	0.000157653	0.00946407	1.36534
comp38394				39.1117	4.13996	74.0834	4.16146	8.29164e-12	5.92734e-09	4.16146
comp38650	peroxisomal targeting signal type 2 receptor that facilitates peroxisomal protein translocation. It recognizes proteins with the PTS2 consensus sequence (RLX5HL or a variant) within the first 30 or so amino acids. RNAi experiments suggest that PEX7 is necessary for the maintenance of glyoxysomal but not leaf peroxisomal function.	AT1G29260.1	2e-15	20.6685	5.34484	35.9921	2.75146	1.70589e-05	0.00156015	2.75146
comp38736				379.353	198.182	560.524	1.49995	6.12322e-06	0.000675541	1.49995
comp38803	IAP-like protein 1 (ILP1); FUNCTIONS IN: zinc ion binding; LOCATED IN: cytosol, nucleus, phragmoplast; EXPRESSED IN: 23 plant structures; EXPRESSED DURING: 13 growth stages; CONTAINS InterPro DOMAIN/s: Zinc finger, C3HC-like (InterPro:IPR012935), Proteinase inhibitor I32, inhibitor of apoptosis (InterPro:IPR001370); BEST Arabidopsis thaliana protein match is: C3HC zinc finger-like (TAIR:AT1G48950…	AT1G17210.1	5e-122	1882.22	1174.46	2589.97	1.14094	0.000113338	0.00724456	1.14094
comp38804	polyribonucleotide nucleotidyltransferase, putative; FUNCTIONS IN: polyribonucleotide nucleotidyltransferase activity, 3'-5'-exoribonuclease activity, RNA binding, nucleic acid binding; INVOLVED IN: mRNA catabolic process, RNA processing; LOCATED IN: mitochondrion; EXPRESSED IN: 16 plant structures; EXPRESSED DURING: 7 growth stages; CONTAINS InterPro DOMAIN/s: K Homology, type 1, subgroup (Inter…	AT5G14580.1	0	2535.56	1390.38	3680.74	1.40452	1.86408e-06	0.00025314	1.40452
comp38812	hydroxyproline-rich glycoprotein family protein; BEST Arabidopsis thaliana protein match is: oxidoreductase, 2OG-Fe(II) oxygenase family protein (TAIR:AT4G02940.1); Has 6006 Blast hits to 3456 proteins in 374 species: Archae - 2; Bacteria - 410; Metazoa - 1957; Fungi - 511; Plants - 1958; Viruses - 385; Other Eukaryotes - 783 (source: NCBI BLink).	AT1G14710.2	4e-51	1353.61	836.274	1870.95	1.16172	9.14334e-05	0.00614727	1.16172
comp38844	Nuclear transport factor 2 (NTF2) family protein; CONTAINS InterPro DOMAIN/s: Wound-induced protein, Wun1 (InterPro:IPR009798); BEST Arabidopsis thaliana protein match is: senescence associated gene 20 (TAIR:AT3G10985.1); Has 1807 Blast hits to 1807 proteins in 277 species: Archae - 0; Bacteria - 0; Metazoa - 736; Fungi - 347; Plants - 385; Viruses - 0; Other Eukaryotes - 339 (source: NCBI BLink).	AT5G01740.1	4e-25	491.31	297.119	685.5	1.20611	6.1875e-06	0.000679422	1.20611
comp38879				1474.01	929.173	2018.85	1.11951	0.000131991	0.00820479	1.11951
comp38907	ILITYHIA (ILA) is a HEAT repeat protein involved in plant immunity. The gene is also involved in systemic acquired resistance induced by P. syringae expressing avrRps4. Loss-of-function mutants of ILA caused pleiotropic defects in the mutant plants. The mutant plants are smaller in size and the leaves are serrated and yellow to light green in color. Required for bacterium-triggered stomatal closu…	AT1G64790.1	0	2925.9	1396.3	4455.5	1.67398	1.39368e-08	4.01792e-06	1.67398
comp38980	Tetratricopeptide repeat (TPR)-like superfamily protein; INVOLVED IN: biological_process unknown; LOCATED IN: endomembrane system; EXPRESSED IN: 23 plant structures; EXPRESSED DURING: 13 growth stages; Has 1807 Blast hits to 1807 proteins in 277 species: Archae - 0; Bacteria - 0; Metazoa - 736; Fungi - 347; Plants - 385; Viruses - 0; Other Eukaryotes - 339 (source: NCBI BLink).	AT5G16280.1	0	2106.34	1162.71	3049.98	1.39131	2.79053e-06	0.000345422	1.39131
comp39010	Encodes a protein involved in cell elongation in root and anther filaments. Mutants have greater cell volumes in root tissues and have additive phenotypes with other cell expansion mutants such as those carrying mutations in COB, QUI and POM1 loci. POM2/CSI1 promotes Cellulose Synthase and microtubule co-alignment.	AT2G22125.1	0	2301.7	1225.82	3377.58	1.46225	4.87145e-07	8.40577e-05	1.46225	yes
comp39035	Allelic to ISE2(increased size exclusion limit of plasmodesmata 2). Mutants maintain dilated plasmodesmata at the embryonic torpedo stage.	AT1G70070.1	6e-45	1738.34	874.668	2602	1.57282	1.34516e-07	2.85566e-05	1.57282
comp39046	Encodes a subunit of the polyadenylation apparatus that interacts with and stimulates the activity of poly(A) polymerase. Additionally , it interacts with several polyadenylation factor subunits and is an RNA-binding protein. It is suggested that this protein coordinates a number of polyadenylation factor subunits with PAP and with RNA.	AT5G58040.1	6e-41	941.215	436.716	1445.71	1.72701	1.61423e-08	4.54163e-06	1.72701
comp39056	Aldolase superfamily protein; FUNCTIONS IN: fructose-bisphosphate aldolase activity; INVOLVED IN: response to oxidative stress, response to cadmium ion, pentose-phosphate shunt; LOCATED IN: mitochondrion, chloroplast, plastoglobule; EXPRESSED IN: 25 plant structures; EXPRESSED DURING: 15 growth stages; CONTAINS InterPro DOMAIN/s: Aldolase-type TIM barrel (InterPro:IPR013785), Fructose-bisphosphat…	AT2G01140.1	0	1349.18	2096.29	602.059	-1.79986	4.64169e-11	2.60142e-08	1.79986	yes
comp39063	Protein kinase superfamily protein; FUNCTIONS IN: kinase activity; INVOLVED IN: protein amino acid phosphorylation; LOCATED IN: cytosol, plasma membrane; EXPRESSED IN: cultured cell; CONTAINS InterPro DOMAIN/s: Serine/threonine-protein kinase domain (InterPro:IPR002290), Serine/threonine-protein kinase-like domain (InterPro:IPR017442), AGC-kinase, C-terminal (InterPro:IPR000961), Serine/threonine…	AT3G17850.1	0	901.981	477.197	1326.76	1.47526	5.66524e-07	9.42717e-05	1.47526	yes
comp39072	Encodes a subunit of RNA polymerase I (aka RNA polymerase A).	AT3G57660.1	0	1322.24	688.715	1955.77	1.50576	8.26416e-07	0.000129231	1.50576
comp39079	GRV2 has sequence similarity to the C. elegans protein RME-8 which is involved in endocytosis. grv2 mutants result in a reduction in gravitropic response in hypocotyls and shoots but do not affect root gravitropism. The mutants are defective in amyloplast sedimentation.	AT2G26890.1	0	2476.14	917.318	4034.96	2.13706	1.95514e-13	2.14015e-10	2.13706
comp39080	GDSL-like Lipase/Acylhydrolase superfamily protein	AT4G01130.1	2e-61	1108.55	1611.4	605.698	-1.41164	4.5547e-07	8.01444e-05	1.41164
comp39085	MRP subfamily	AT3G62700.1	0	2032.3	1120.4	2944.2	1.39386	2.89948e-06	0.000356988	1.39386
comp39098	embryo defective 2458 (emb2458); FUNCTIONS IN: nucleoside-triphosphatase activity, ATPase activity, metalloendopeptidase activity, nucleotide binding, ATP binding; INVOLVED IN: embryo development ending in seed dormancy; LOCATED IN: chloroplast, chloroplast envelope; EXPRESSED IN: 22 plant structures; EXPRESSED DURING: 13 growth stages; CONTAINS InterPro DOMAIN/s: ATPase, AAA-type, core (InterPro…	AT3G04340.1	3e-180	1894.74	1086.33	2703.15	1.31518	4.84468e-05	0.00369313	1.31518	yes
comp39118	SWI/SNF chromatin remodeling ATPase that upregulates transcription of all three CUC genes and is involved in the formation and/or maintenance of boundary cells during embryogenesis. Also mediates repression of expression of seed storage proteins in vegetative tissues. Interacts strongly with AtSWI3C, also with AtSWI3B, but not with AtSWI3A or AtSWI3D.	AT2G46020.2	0	1760.89	584.058	2937.72	2.33051	3.84228e-15	5.17643e-12	2.33051
comp39146	Predicted AT-hook DNA-binding family protein; CONTAINS InterPro DOMAIN/s: Protein of unknown function DUF296 (InterPro:IPR005175), Predicted AT-hook DNA-binding (InterPro:IPR014476); BEST Arabidopsis thaliana protein match is: Predicted AT-hook DNA-binding family protein (TAIR:AT2G35270.1); Has 956 Blast hits to 951 proteins in 109 species: Archae - 0; Bacteria - 110; Metazoa - 54; Fungi - 9; Pla…	AT4G17800.1	9e-32	993.868	610.134	1377.6	1.17496	8.00497e-05	0.00546585	1.17496	yes
comp39179				174.347	25.7252	322.969	3.65015	6.07551e-21	2.36459e-17	3.65015
comp39194				34.7522	12.948	56.5563	2.12696	7.06807e-05	0.00496153	2.12696
comp39222	NAC family member, functions as a transcriptional activator, regulates flavonoid biosynthesis under high light.	AT5G04410.1	2e-73	1286.95	753.832	1820.06	1.27167	1.22206e-05	0.00117924	1.27167
comp39247	Encodes HCC1, homologue of the copper chaperone SCO1 (synthesis of cytochrome c oxidase 1) from the yeast Saccharomyces cerevisiae. SCO1 encodes a mitochondrial protein that is essential for the correct assembly of complex IV in the respiratory chain. HCC1 is localized in the mitochondrion. A chimeric yeast Sco1-Arabidopsis HCC1 protein complements yeast Sco1 activity. Embryos of hcc1 mutants bec…	AT3G08950.1	3e-81	1575.55	917.438	2233.65	1.28372	4.48517e-06	0.00052632	1.28372
comp39252	Hypoxia-responsive family protein	AT3G05550.1	7e-15	1738.4	2444.91	1031.88	-1.24451	1.29898e-05	0.00124659	1.24451
comp39295				2736.11	1581.29	3890.92	1.29901	0.000130395	0.00814165	1.29901
comp39302	Encodes an early light-inducible protein.	AT3G22840.1	7e-21	1751.66	832.857	2670.46	1.68095	6.10172e-10	2.62247e-07	1.68095
comp39326	unknown protein ; INVOLVED IN: biological_process unknown; LOCATED IN: cellular_component unknown; CONTAINS InterPro DOMAIN/s: mRNA splicing factor, Cwf21 (InterPro:IPR013170); Has 30201 Blast hits to 17322 proteins in 780 species: Archae - 12; Bacteria - 1396; Metazoa - 17338; Fungi - 3422; Plants - 5037; Viruses - 0; Other Eukaryotes - 2996 (source: NCBI BLink).	AT3G49601.1	2e-31	1880.85	1135.77	2625.93	1.20915	4.5567e-05	0.00350027	1.20915
comp39423				13682.9	7493.07	19872.8	1.40717	1.7969e-07	3.68082e-05	1.40717
comp39425	light harvesting complex protein associated with photosystem I.	AT3G54890.1	1e-113	5510.34	7591.16	3429.53	-1.14631	4.01521e-05	0.00317726	1.14631
comp39455	late embryogenesis abundant domain-containing protein / LEA domain-containing protein; FUNCTIONS IN: molecular_function unknown; INVOLVED IN: embryo development ending in seed dormancy; LOCATED IN: endomembrane system; EXPRESSED IN: petal, leaf whorl, sperm cell, male gametophyte, flower; EXPRESSED DURING: L mature pollen stage, M germinated pollen stage, 4 anthesis, petal differentiation and exp…	AT2G18340.1	1e-14	7789.76	2297.73	13281.8	2.53117	1.34248e-19	3.76194e-16	2.53117
comp39566	P-loop containing nucleoside triphosphate hydrolases superfamily protein; FUNCTIONS IN: microtubule motor activity, ATP binding; INVOLVED IN: microtubule-based movement; LOCATED IN: chloroplast; EXPRESSED IN: 20 plant structures; EXPRESSED DURING: 8 growth stages; CONTAINS InterPro DOMAIN/s: Kinesin, motor region, conserved site (InterPro:IPR019821), Kinesin, motor domain (InterPro:IPR001752); BE…	AT3G44050.1	0	3942.48	1564.13	6320.83	2.01476	7.45962e-12	5.44366e-09	2.01476
comp39676	MPPBETA; FUNCTIONS IN: metalloendopeptidase activity, zinc ion binding; INVOLVED IN: proteolysis; LOCATED IN: in 11 components; EXPRESSED IN: 27 plant structures; EXPRESSED DURING: 17 growth stages; CONTAINS InterPro DOMAIN/s: Peptidase M16, zinc-binding site (InterPro:IPR001431), Peptidase M16, C-terminal (InterPro:IPR007863), Peptidase M16, N-terminal (InterPro:IPR011765), Metalloenzyme, LuxS/M…	AT3G02090.2	8e-19	402.05	80.2574	723.844	3.17297	1.10589e-22	7.04312e-19	3.17297
comp39715	Member of Actin gene family.Mutants are defective in germination and root growth.	AT5G09810.1	1e-30	365.416	155.677	575.155	1.8854	6.04833e-10	2.61557e-07	1.8854
comp39763	transmembrane protein with similarity to the sterol desaturase family at the N-terminus and to the short-chain dehydrogenase/reductase family at the C-terminus. Mutant analyses indicate this protein is involved in cuticle membrane and wax biosynthesis.	AT5G57800.1	0	472.857	261.47	684.243	1.38786	3.74045e-06	0.000447934	1.38786
comp39789	S1P appears to function as a Golgi-localized subtilase and to help protect seedlings against salt and osmotic stress. The roots of s1p-3 mutants are hypersensitive to NaCl, KCl, LiCl, and mannitol. Several salt-stress responsive genes show weaker induction in an s1P-3 mutant background. The proteolytic cleavage of the bZIP17 transcription factor depends on S1P in vitro. And there is evidence that…	AT5G19660.1	0	817.441	454.416	1180.47	1.37727	5.58722e-06	0.000624271	1.37727
comp39792	RELA/SPOT homolog 3 (RSH3); FUNCTIONS IN: GTP diphosphokinase activity; INVOLVED IN: guanosine tetraphosphate metabolic process; LOCATED IN: chloroplast; EXPRESSED IN: 25 plant structures; EXPRESSED DURING: 15 growth stages; CONTAINS InterPro DOMAIN/s: Metal-dependent phosphohydrolase, HD subdomain (InterPro:IPR006674), Metal-dependent phosphohydrolase, HD domain (InterPro:IPR003607), RelA/SpoT (…	AT1G54130.1	8e-41	510.921	303.844	717.999	1.24065	9.95998e-05	0.00658532	1.24065
comp39880	GYF domain-containing protein; LOCATED IN: chloroplast; EXPRESSED IN: cultured cell; CONTAINS InterPro DOMAIN/s: GYF (InterPro:IPR003169); BEST Arabidopsis thaliana protein match is: GYF domain-containing protein (TAIR:AT1G27430.1); Has 5832 Blast hits to 4523 proteins in 447 species: Archae - 0; Bacteria - 473; Metazoa - 1947; Fungi - 549; Plants - 478; Viruses - 23; Other Eukaryotes - 2362 (sou…	AT1G24300.1	5e-37	940.505	524.132	1356.88	1.37229	6.2656e-06	0.000685849	1.37229
comp39953				158.914	33.222	284.605	3.09875	3.20368e-09	1.11356e-06	3.09875
comp40039	bacterial contamination			448.145	896.289	0	-Inf	6.40376e-06	0.000697701	Inf
comp40067	BRI1 suppressor 1 (BSU1)-like 2 (BSL2); FUNCTIONS IN: hydrolase activity, manganese ion binding, protein serine/threonine phosphatase activity, phosphoprotein phosphatase activity, iron ion binding; INVOLVED IN: biological_process unknown; LOCATED IN: plasma membrane; EXPRESSED IN: male gametophyte, guard cell, cultured cell, pollen tube; EXPRESSED DURING: M germinated pollen stage; CONTAINS Inte…	AT1G08420.1	0	807.642	423.27	1192.01	1.49375	7.25457e-07	0.000116299	1.49375	yes
comp40154	CONTAINS InterPro DOMAIN/s: Domain of unknown function DUF3598 (InterPro:IPR022017); Has 41 Blast hits to 35 proteins in 15 species: Archae - 0; Bacteria - 0; Metazoa - 0; Fungi - 0; Plants - 41; Viruses - 0; Other Eukaryotes - 0 (source: NCBI BLink).	AT2G44760.1	5e-22	151.601	81.6532	221.548	1.44004	3.69101e-05	0.00298588	1.44004
comp40169				89.7822	29.0364	150.528	2.3741	2.14217e-08	5.83937e-06	2.3741
comp40286	binding; FUNCTIONS IN: binding; INVOLVED IN: biological_process unknown; LOCATED IN: cellular_component unknown; EXPRESSED IN: 21 plant structures; EXPRESSED DURING: 13 growth stages; CONTAINS InterPro DOMAIN/s: Chromosome condensation protein, HCP-6-related (InterPro:IPR012371), Armadillo-type fold (InterPro:IPR016024); BEST Arabidopsis thaliana protein match is: binding (TAIR:AT3G57060.1); Has …	AT4G15890.1	0	1647.51	785.599	2509.42	1.67549	1.58122e-08	4.48477e-06	1.67549
comp40335				187.249	32.4851	342.013	3.3962	8.64154e-20	2.52246e-16	3.3962
comp40341	TPX2 (targeting protein for Xklp2) protein family; CONTAINS InterPro DOMAIN/s: Xklp2 targeting protein (InterPro:IPR009675); BEST Arabidopsis thaliana protein match is: TPX2 (targeting protein for Xklp2) protein family (TAIR:AT3G01015.1); Has 1184 Blast hits to 1000 proteins in 137 species: Archae - 0; Bacteria - 15; Metazoa - 507; Fungi - 52; Plants - 301; Viruses - 3; Other Eukaryotes - 306 (so…	AT5G15510.1	3e-23	1095.5	590.393	1600.61	1.43888	1.92352e-06	0.000259642	1.43888
comp40351	Homologous to the four eubacterial men genes involved in menanoquinone biosynthesis. Studies of mutants defective in this gene demonstrated its involvement in phylloquinone biosynthesis in Arabidopsis.	AT1G68890.1	0	1261.36	671.954	1850.77	1.46169	2.63681e-06	0.000331565	1.46169
comp40366	Pre-mRNA-processing-splicing factor; a genetic locus involved in embryogenesis. Mutations in this locus result in an abnormal suspensor and embryo lethality.	AT1G80070.1	0	4378.12	2409.68	6346.56	1.39714	2.58275e-06	0.000327739	1.39714
comp40395	Ubiquitin carboxyl-terminal hydrolase-related protein; FUNCTIONS IN: ubiquitin thiolesterase activity, zinc ion binding; INVOLVED IN: ubiquitin-dependent protein catabolic process; LOCATED IN: intracellular; CONTAINS InterPro DOMAIN/s: Protein of unknown function DUF627 (InterPro:IPR006866), Peptidase C19, ubiquitin carboxyl-terminal hydrolase 2 (InterPro:IPR001394), Zinc finger, C2H2-type (Inter…	AT3G47890.1	0	2352.3	1385.29	3319.32	1.26069	2.90739e-05	0.00245103	1.26069	yes
comp40443	SNF2 domain-containing protein / helicase domain-containing protein / F-box family protein; FUNCTIONS IN: helicase activity, DNA binding, zinc ion binding, nucleic acid binding, ATP binding; LOCATED IN: endomembrane system; CONTAINS InterPro DOMAIN/s: F-box domain, cyclin-like (InterPro:IPR001810), Zinc finger, RING-type, conserved site (InterPro:IPR017907), Zinc finger, RING-type (InterPro:IPR00…	AT3G54460.1	0	696.073	352.346	1039.8	1.56124	3.52379e-07	6.48065e-05	1.56124
comp40457	malic enzyme (EC 1.1.1.40) encoded by AtNADP-ME4 is localized to chloroplasts. The gene is expressed throughout the whole plant and during embryogenesis and germination. A possible involvement in the fatty acid biosynthesis has been proposed.	AT1G79750.1	0	546.04	303.399	788.68	1.37822	1.2553e-06	0.000182451	1.37822
comp40491	largest subunit of nuclear DNA-dependent RNA polymerase II; the ortholog of budding yeast RPB1 and a homolog of the E. coli RNA polymerase beta prime subunit.	AT4G35800.1	0	2032.62	906.575	3158.66	1.80081	8.2022e-10	3.40008e-07	1.80081
comp40501	Encodes EDM2 (enhanced downy mildew 2). The predicted protein bears typical features of transcriptional regulators. EDM2 contains two putative bipartite nuclear localization signals (NLS) two zinc-finger-like motifs, a Proline-rich region and a large aspartic acid-rich region. Both zinc-finger-like stretches resemble the PHD (plant homeodomain) finger motif. Mutations in EDM2 comprise RPP7 mediat…	AT5G55390.2	9e-101	2014.15	1247.55	2780.75	1.15638	0.000111475	0.00716783	1.15638	lncRNA
comp40502	SWI/SWF nuclear-localized chromatin remodeling factor of the CHD3 group. Involved in post-germination repression of embryonic development. Acts with GA to establish repression of embryonic genes upon germination. Protein preferentially accumulates in differentiating tissues. Loss of function alleles are associated with expression of embryonic traits in adult plants and derepression of embryonic g…	AT2G25170.1	5e-124	1147.68	633.501	1661.86	1.39138	5.24411e-06	0.00059255	1.39138
comp40511	cell division cycle protein 48-related / CDC48-related; FUNCTIONS IN: nucleoside-triphosphatase activity, nucleotide binding, ATP binding; EXPRESSED IN: 17 plant structures; EXPRESSED DURING: 7 growth stages; CONTAINS InterPro DOMAIN/s: ATPase, AAA-type, core (InterPro:IPR003959), ATPase, AAA+ type, core (InterPro:IPR003593), ATPase, AAA-type, conserved site (InterPro:IPR003960), Bromodomain (Int…	AT1G05910.1	0	1944.85	1094.29	2795.41	1.35306	5.01386e-06	0.00057114	1.35306	yes
comp40521	FRAGILE FIBER3 (FRA3); FUNCTIONS IN: inositol or phosphatidylinositol phosphatase activity; EXPRESSED IN: 23 plant structures; EXPRESSED DURING: 13 growth stages; CONTAINS InterPro DOMAIN/s: Inositol polyphosphate related phosphatase (InterPro:IPR000300), WD40 repeat-like-containing domain (InterPro:IPR011046), WD40/YVTN repeat-like-containing domain (InterPro:IPR015943), WD40 repeat (InterPro:IP…	AT1G65580.1	0	730.717	411.535	1049.9	1.35117	1.02163e-05	0.00102685	1.35117
comp40564	CLIP-associated protein	AT2G20190.1	0	1492.42	893.495	2091.34	1.2269	5.81024e-05	0.00427565	1.2269
comp40612	transducin family protein / WD-40 repeat family protein; CONTAINS InterPro DOMAIN/s: WD40 repeat 2 (InterPro:IPR019782), WD40 repeat (InterPro:IPR001680), RAVE protein 1 C-terminal (InterPro:IPR022033), WD40 repeat-like-containing domain (InterPro:IPR011046), WD40-repeat-containing domain (InterPro:IPR017986), WD40/YVTN repeat-like-containing domain (InterPro:IPR015943), WD40 repeat, subgroup (In…	AT2G46560.1	8e-137	1274.21	557.183	1991.23	1.83744	6.79794e-10	2.90388e-07	1.83744
comp40629	Transducin/WD40 repeat-like superfamily protein; FUNCTIONS IN: nucleotide binding; INVOLVED IN: biological_process unknown; LOCATED IN: plasma membrane; EXPRESSED IN: 23 plant structures; EXPRESSED DURING: 13 growth stages; CONTAINS InterPro DOMAIN/s: WD40 repeat 2 (InterPro:IPR019782), WD40 repeat-like-containing domain (InterPro:IPR011046), WD40-repeat-containing domain (InterPro:IPR017986), WD…	AT3G50590.1	0	1564.99	884.759	2245.21	1.3435	6.10765e-06	0.000674886	1.3435
comp40634	member of Myosin-like proteins	AT3G19960.1	0	1155.18	672.329	1638.03	1.28472	2.25506e-05	0.00196493	1.28472
comp40640				17.0552	2.9669	31.1434	3.3919	1.01607e-05	0.00102273	3.3919
comp40668	methyltransferase PMT20	AT4G19120.2	4e-169	454.281	620.227	288.335	-1.10505	9.95858e-05	0.00658532	1.10505
comp40724				62.4851	93.8111	31.159	-1.59011	0.000102094	0.00669904	1.59011	yes
comp40758	MSH6; DNA mismatch repair homolog of human MutS gene, MSH6. There are four MutS genes in Arabidopsis, MSH2, MSH3, MSH6, and MSH7, which all act as heterodimers and bind to 51-mer duplexes. MSH2*MSH6 bound the (+T) substrate strongly, (T/G) well, and (+AAG) no better than it did a (T/A) homoduplex.	AT4G02070.1	0	1074.21	595.394	1553.04	1.38318	3.19604e-06	0.000390753	1.38318
comp40774				591.252	331.193	851.311	1.36201	1.01518e-05	0.00102273	1.36201
comp40809	L-ascorbate oxidase; FUNCTIONS IN: oxidoreductase activity, L-ascorbate oxidase activity, copper ion binding; INVOLVED IN: oxidation reduction; LOCATED IN: cell wall; EXPRESSED IN: 23 plant structures; EXPRESSED DURING: 13 growth stages; CONTAINS InterPro DOMAIN/s: Multicopper oxidase, type 2 (InterPro:IPR011706), Multicopper oxidase, type 3 (InterPro:IPR011707), Cupredoxin (InterPro:IPR008972), …	AT5G21105.1	0	743.31	433.394	1053.23	1.28106	4.49201e-05	0.00346959	1.28106
comp40843				135.065	254.208	15.9231	-3.99682	6.64833e-09	2.13869e-06	3.99682
comp40880	ferredoxin dependent glutamate synthase (Fd-GOGAT). Expression in leaves is induced by light and sucrose. Proposed to be involved in photorespiration and nitrogen assimilation.	AT5G04140.1	0	2847.41	1681.63	4013.19	1.25489	2.955e-05	0.00247923	1.25489
comp40928	ABC transporter family protein; FUNCTIONS IN: ATPase activity, coupled to transmembrane movement of substances; LOCATED IN: endomembrane system; EXPRESSED IN: 10 plant structures; EXPRESSED DURING: L mature pollen stage, M germinated pollen stage, 4 anthesis, C globular stage, petal differentiation and expansion stage; CONTAINS InterPro DOMAIN/s: ATPase, AAA+ type, core (InterPro:IPR003593), ABC …	AT5G60740.1	0	2152.46	1285.18	3019.73	1.23245	1.1638e-05	0.00113238	1.23245
comp41152	LITTLE NUCLEI4 (LINC4); EXPRESSED IN: 23 plant structures; EXPRESSED DURING: 13 growth stages; BEST Arabidopsis thaliana protein match is: branched-chain amino acid aminotransferase 5 / branched-chain amino acid transaminase 5 (BCAT5) (TAIR:AT5G65780.2).	AT5G65770.3	3e-86	1857.66	1137.6	2577.71	1.1801	9.39273e-05	0.00630284	1.1801
comp41261				47.1629	11.0291	83.2968	2.91695	1.24234e-08	3.64156e-06	2.91695
comp41292	RING E3 ubiquitin ligase. It appears to regulate the stability of the KRP1/ICK1 cyclin dependent kinase inhibitor. Induced by beet severe curly virus (BSCTV) C4 protein.	AT2G22010.1	0	1972.79	1093.85	2851.73	1.38243	1.49972e-06	0.000213981	1.38243
comp41304	Encodes acetyl-CoA carboxylase. Mutant displays uncoordinated cell divisions which are enhanced by cytokinins. Mutant also has aberrant organization of the apical region in the embryo and abnormal root and shoot development and is deficient in freezing tolerance after cold acclimation. Essential for very long chain fatty acid elongation.	AT1G36160.2	0	5677.75	2974.41	8381.08	1.49453	2.47241e-07	4.81304e-05	1.49453
comp41320	late embryogenesis abundant domain-containing protein / LEA domain-containing protein; INVOLVED IN: embryo development ending in seed dormancy; LOCATED IN: endomembrane system; EXPRESSED IN: sperm cell; CONTAINS InterPro DOMAIN/s: Late embryogenesis abundant protein, group 4 (InterPro:IPR004238); BEST Arabidopsis thaliana protein match is: Late embryogenesis abundant protein (LEA) family protein …	AT1G72100.1	2e-21	3184.43	1235.5	5133.35	2.0548	1.44384e-13	1.60555e-10	2.0548
comp41430				18.4651	4.02866	32.9016	3.02978	8.05421e-05	0.00548877	3.02978
comp41457				18.6605	3.7736	33.5475	3.15219	1.48975e-05	0.00139154	3.15219
comp41492	transducin family protein / WD-40 repeat family protein; FUNCTIONS IN: molecular_function unknown; LOCATED IN: CUL4 RING ubiquitin ligase complex, membrane; EXPRESSED IN: 24 plant structures; EXPRESSED DURING: 14 growth stages; CONTAINS InterPro DOMAIN/s: WD40 repeat 2 (InterPro:IPR019782), WD40 repeat-like-containing domain (InterPro:IPR011046), WD40 repeat, conserved site (InterPro:IPR019775), …	AT3G63460.2	0	3034.59	1766.32	4302.85	1.28455	8.47625e-06	0.000879722	1.28455
comp41539				49.0283	81.9483	16.1083	-2.34691	6.39807e-08	1.46958e-05	2.34691
comp41728	MEK kinase (MAP3Ka)	AT1G53570.1	3e-74	794.617	470.499	1118.73	1.2496	3.75599e-05	0.00302796	1.2496
comp41867	pentatricopeptide (PPR) protein involved in leaf and root development. dot4 mutants have an aberrant midgap venation pattern in juvenile leaves and cotyledons.	AT4G18750.1	1e-33	126.313	17.9922	234.633	3.70497	1.48029e-20	5.45807e-17	3.70497
comp41953	Encodes a protein that interacts with the 26S proteasome. Mutants are phenotypically indistinguishable from wild type plants under a variety of growth conditions. Protein levels increase upon exposure of seedlings to MG132, a specific, potent, reversible, and cell-permeable proteasome inhibitor.	AT3G13330.1	0	2186.74	988.16	3385.32	1.77648	1.30234e-09	5.12566e-07	1.77648
comp41973	embryo defective 140 A locus involved in embryogenesis. Mutations in this locus result in embryo lethality.	AT4G24270.1	0	1660.05	986.28	2333.83	1.24263	2.813e-05	0.00238004	1.24263
comp42010				520.178	787.363	252.993	-1.63793	5.2919e-07	8.97649e-05	1.63793
comp42166	Encodes a member of the FT and TFL1 family of phosphatidylethanolamine-binding proteins. It is expressed in seeds and up-regulated in response to ABA. Loss of function mutants show decreased rate of germination in the presence of ABA. ABA dependent regulation is mediated by both ABI3 and ABI5. ABI5 promotes MFT expression, primarily in the radicle-hypocotyl transition zone and ABI3 suppresses it …	AT1G18100.1	4e-54	361.949	206.308	517.589	1.32701	3.03727e-06	0.000371991	1.32701
comp42397				560.57	284.444	836.695	1.55656	2.5087e-07	4.84157e-05	1.55656
comp42647				16.13	1.6134	30.6466	4.24755	2.51859e-06	0.000322564	4.24755
comp42722	RAD50 It is involved in double strand break repair. Component of the meiotic recombination complex that processes meiotic double-strand-breaks to produce single-stranded DNA ends, which act in the homology search and recombination. Accumulates in the nucleus during meiotic prophase, a process regulated by PHS1.	AT2G31970.1	0	933.31	537.789	1328.83	1.30504	1.74079e-05	0.00157971	1.30504
comp42770	PHYTOCHROME RAPIDLY REGULATED1 PAR1 protein; FUNCTIONS IN: molecular_function unknown; INVOLVED IN: biological_process unknown; LOCATED IN: endomembrane system; EXPRESSED IN: 13 plant structures; EXPRESSED DURING: 8 growth stages; CONTAINS InterPro DOMAIN/s: PAR1 (InterPro:IPR009489); BEST Arabidopsis thaliana protein match is: PAR1 protein (TAIR:AT3G54040.1); Has 1807 Blast hits to 1807 proteins…	AT5G52390.1	1e-17	21.9012	4.45035	39.352	3.14445	2.52676e-06	0.00032302	3.14445
comp42857	Encodes a peroxidase with diverse roles in the wound response, flower development, and syncytium formation.	AT5G06720.1	3e-53	267.009	425.879	108.138	-1.97757	6.85717e-11	3.69528e-08	1.97757
comp42879	Encodes a member of the Lon protease-like proteins (Lon1/At5g26860, Lon2/At5g47040, Lon3/At3g05780, Lon4/At3g05790). Lon is a multifunctional ATP-dependent protease which exists in bacteria, archaea and within organelles in eukaryotic cells. Lon proteases are responsible for the degradation of abnormal, damaged and unstable proteins.	AT5G26860.1	0	2039.61	1153.03	2926.2	1.3436	4.63331e-06	0.000540085	1.3436
comp42922	Domain of unknown function (DUF23); CONTAINS InterPro DOMAIN/s: Protein of unknown function DUF23 (InterPro:IPR008166); BEST Arabidopsis thaliana protein match is: Domain of unknown function (DUF23) (TAIR:AT5G44670.1); Has 195 Blast hits to 195 proteins in 24 species: Archae - 2; Bacteria - 7; Metazoa - 43; Fungi - 0; Plants - 139; Viruses - 0; Other Eukaryotes - 4 (source: NCBI BLink).	AT2G33570.1	7e-109	152.353	87.0421	217.665	1.32232	0.000113838	0.00726989	1.32232
comp42959	REVOLUTA regulates meristem initiation at lateral positions. a member of a small homeodomain-leucine zipper family. Has overlapping functions with PHAVOLUTA and PHABULOSA.	AT5G60690.1	4e-41	52.5332	19.8219	85.2446	2.10451	7.32538e-07	0.000116856	2.10451
comp43008				17.0615	1.48345	32.6395	4.45959	2.49634e-07	4.83104e-05	4.45959
comp43015	PRR7 and PRR9 are partially redundant essential components of a temperature-sensitive circadian system. CCA1 and LHY had a positive effect on PRR7 expression levels. Acts as transcriptional repressor of CCA1 and LHY.	AT5G02810.1	4e-70	2158.02	1310.09	3005.96	1.19816	6.31058e-05	0.00456246	1.19816
comp43027				69.3475	22.3499	116.345	2.38007	2.89003e-08	7.55462e-06	2.38007
comp43045				27.9215	4.72891	51.114	3.43414	2.35843e-07	4.65416e-05	3.43414
comp43192	ATPase subunit 1	ATMG01190.1	0	423.106	714.994	131.217	-2.44597	1.30564e-11	9.05626e-09	2.44597
comp43249				13.4579	1.13575	25.7801	4.50454	2.59468e-06	0.00032797	4.50454
comp43320	encodes a ubiquitin-protein ligase-like protein containing a HECT domain. There are six other HECT-domain UPLs in Arabidopsis.	AT1G70320.1	0	8277.96	2878.42	13677.5	2.24846	5.27683e-15	6.97497e-12	2.24846
comp43519	Pentatricopeptide repeat (PPR) superfamily protein; CONTAINS InterPro DOMAIN/s: Pentatricopeptide repeat (InterPro:IPR002885); BEST Arabidopsis thaliana protein match is: Tetratricopeptide repeat (TPR)-like superfamily protein (TAIR:AT3G57430.1); Has 37890 Blast hits to 13461 proteins in 236 species: Archae - 0; Bacteria - 8; Metazoa - 36; Fungi - 51; Plants - 37361; Viruses - 0; Other Eukaryotes…	AT3G13770.1	6e-34	58.1299	15.2803	100.98	2.72432	8.63026e-09	2.65176e-06	2.72432
comp43532	Encodes the Arabidopsis INO80 ortholog of the SWI/SNF ATPase family. Functions as a positive regulator of DNA homologous recombination (HR). In INO80 mutants, the HR frequency is reduced to 15% of that in the wild-type. Mutation in INO80 does not affect sensitivity to genotoxic agents and efficiency of T-DNA integration. INO80 was also shown to regulate a subset of the Arabidopsis transcriptome.	AT3G57300.1	0	1939.31	964.81	2913.81	1.59459	7.76194e-08	1.74846e-05	1.59459
comp43541	RNA-binding KH domain-containing protein; FUNCTIONS IN: RNA binding; LOCATED IN: cellular_component unknown; EXPRESSED IN: 22 plant structures; EXPRESSED DURING: 13 growth stages; CONTAINS InterPro DOMAIN/s: K Homology, type 1, subgroup (InterPro:IPR018111), K Homology (InterPro:IPR004087); Has 734 Blast hits to 734 proteins in 323 species: Archae - 189; Bacteria - 0; Metazoa - 158; Fungi - 192; …	AT3G13230.1	2e-12	156.425	54.5695	258.28	2.24277	1.91955e-10	9.54245e-08	2.24277
comp43573	Tetratricopeptide repeat (TPR)-like superfamily protein; CONTAINS InterPro DOMAIN/s: Pentatricopeptide repeat (InterPro:IPR002885); BEST Arabidopsis thaliana protein match is: Tetratricopeptide repeat (TPR)-like superfamily protein (TAIR:AT4G39530.1); Has 50551 Blast hits to 14033 proteins in 266 species: Archae - 0; Bacteria - 13; Metazoa - 180; Fungi - 93; Plants - 49461; Viruses - 0; Other Euk…	AT3G53360.1	5e-22	110.266	35.9061	184.626	2.36231	3.37784e-09	1.15999e-06	2.36231
comp43605	KCS13, a member of the 3-ketoacyl-CoA synthase family involved in the biosynthesis of VLCFA (very long chain fatty acids).	AT2G46720.1	1e-33	115.304	64.3674	166.241	1.36887	7.95724e-05	0.00544205	1.36887
comp43607				1351.78	625.587	2077.98	1.7319	9.10574e-09	2.76152e-06	1.7319
comp43611	Encodes one of two Arabidopsis RAPTOR/KOG1 homologs. RAPTOR proteins are binding partners of the target of rapamycin kinase that is present in all eukaryotes and play a central role in the stimulation of cell growth and metabolism in response to nutrients. Mutants show embryo lethal phenotype which occurs at pre-globular stage. May interact with TOR kinase in a rapamycin like signaling pathway. I…	AT3G08850.1	0	2623.78	1411.31	3836.25	1.44266	1.6567e-06	0.000232589	1.44266
comp43633	Adenine nucleotide alpha hydrolases-like superfamily protein; FUNCTIONS IN: molecular_function unknown; INVOLVED IN: response to stress; LOCATED IN: cellular_component unknown; EXPRESSED IN: 18 plant structures; EXPRESSED DURING: 9 growth stages; CONTAINS InterPro DOMAIN/s: UspA (InterPro:IPR006016), Rossmann-like alpha/beta/alpha sandwich fold (InterPro:IPR014729), Universal stress protein A (In…	AT3G11930.1	6e-44	1158.69	1784.35	533.037	-1.74309	1.93421e-10	9.54245e-08	1.74309
comp43656	C2 calcium/lipid-binding plant phosphoribosyltransferase family protein; CONTAINS InterPro DOMAIN/s: C2 membrane targeting protein (InterPro:IPR018029), C2 calcium/lipid-binding domain, CaLB (InterPro:IPR008973), Phosphoribosyltransferase C-terminal (InterPro:IPR013583), C2 calcium-dependent membrane targeting (InterPro:IPR000008); BEST Arabidopsis thaliana protein match is: C2 calcium/lipid-bind…	AT3G03680.1	1e-29	74.3267	24.64	124.013	2.33142	2.61811e-08	7.05441e-06	2.33142
comp43715	Leucine-rich repeat (LRR) family protein; FUNCTIONS IN: structural constituent of cell wall; LOCATED IN: cell wall, plant-type cell wall; EXPRESSED IN: 23 plant structures; EXPRESSED DURING: 13 growth stages; CONTAINS InterPro DOMAIN/s: Leucine-rich repeat-containing N-terminal domain, type 2 (InterPro:IPR013210); BEST Arabidopsis thaliana protein match is: Leucine-rich repeat (LRR) family protei…	AT4G13340.1	1e-123	2429.71	996.246	3863.18	1.95521	3.62153e-08	9.12625e-06	1.95521
comp43721	glycosyl hydrolase 9C2 (GH9C2); FUNCTIONS IN: carbohydrate binding, hydrolase activity, hydrolyzing O-glycosyl compounds, catalytic activity; INVOLVED IN: carbohydrate metabolic process; LOCATED IN: endomembrane system, extracellular region; EXPRESSED IN: 23 plant structures; EXPRESSED DURING: 13 growth stages; CONTAINS InterPro DOMAIN/s: Six-hairpin glycosidase (InterPro:IPR012341), Carbohydrate…	AT1G64390.1	0	2573.25	1181.85	3964.64	1.74614	5.57106e-10	2.43929e-07	1.74614
comp43735	NADH-dependent glutamate synthase	AT5G53460.3	0	10543.1	4913.71	16172.5	1.71866	2.47061e-09	8.96791e-07	1.71866
comp43810				30.4322	4.36256	56.5018	3.69505	6.75049e-09	2.13869e-06	3.69505
comp43813				1163.42	1888.19	438.641	-2.10589	1.50937e-06	0.00021492	2.10589
comp43816	member of Nramp2 family	AT1G15960.1	2e-70	74.3821	35.6594	113.105	1.66531	6.14378e-05	0.00447376	1.66531
comp43824	Pentatricopeptide repeat (PPR) superfamily protein; CONTAINS InterPro DOMAIN/s: Pentatricopeptide repeat (InterPro:IPR002885); BEST Arabidopsis thaliana protein match is: Pentatricopeptide repeat (PPR) superfamily protein (TAIR:AT1G11290.1); Has 46134 Blast hits to 13811 proteins in 252 species: Archae - 0; Bacteria - 9; Metazoa - 175; Fungi - 164; Plants - 45093; Viruses - 0; Other Eukaryotes - …	AT2G03380.1	1e-68	74.0637	13.1526	134.975	3.35927	1.10285e-12	1.03015e-09	3.35927
comp44022				21.2404	4.469	38.0117	3.08842	9.67611e-06	0.00098671	3.08842
comp44064	Related to yeast Spt6 protein, which functions as part of a protein complex in transcription initiation and also plays a role in chromatin structure / assembly.	AT1G65440.2	0	4088.85	1869.97	6307.73	1.75411	1.9619e-09	7.31079e-07	1.75411
comp44077	homeodomain protein that is expressed in the LI layer of the vegetative, floral and inflorescence meristems. Binds to the L1 box promoter element which is required in some proteins for L1 specific expression.	AT4G04890.1	0	1507.83	818.133	2197.53	1.42547	2.43858e-06	0.000313463	1.42547
comp44094				13.9029	1.2657	26.5401	4.39016	6.36593e-06	0.000695689	4.39016
comp44117				37.4051	16.4479	58.3623	1.82713	0.000152473	0.00920036	1.82713
comp44207	Predicted PR (pathogenesis-related) protein. Belongs to the lipid transfer protein (PR-14) family with the following members: At2g38540/LTP1, At2g38530/LTP2, At5g59320/LTP3, At5g59310/LTP4, At3g51600/LTP5, At3g08770/LTP6, At2g15050/LTP7, At2g18370/LTP8, At2g15325/LTP9, At5g01870/LTP10, At4g33355/LTP11, At3g51590/LTP12, At5g44265/LTP13, At5g62065/LTP14, At4g08530/LTP15.	AT4G33355.1	2e-13	443.545	277.022	610.067	1.13896	1.71915e-05	0.0015685	1.13896
comp44213	type V subfamily (P5) of P-type ATPase cation pumps; MIA is most similar to the human P5 ATPase ATY2(44% identity) and to Spf1p from S. cerevisiae (41% identity). Highly abundant in the endoplasmic reticulum and small vesicles of developing pollen grains and tapetum cells. T-DNA insertional mutants of MIA suffer from imbalances in cation homeostasis and exhibit a severe reduction in fertility. Mu…	AT5G23630.1	0	2080.06	1248.29	2911.84	1.22198	2.51966e-05	0.00216905	1.22198
comp44380				30.7743	4.37636	57.1722	3.70751	1.29338e-08	3.77537e-06	3.70751
comp44427				32.0743	11.7895	52.3592	2.15094	5.62352e-05	0.0041645	2.15094
comp44533				16.7135	2.40145	31.0255	3.69148	4.85548e-06	0.000559466	3.69148
comp44681	NADH dehydrogenase ND1	ATCG01100.1	9e-13	77.6	33.6707	121.529	1.85174	3.53719e-06	0.000427244	1.85174
comp44758				13.6554	0.918002	26.3927	4.8455	1.82872e-06	0.000249732	4.8455
comp44821	encodes peroxidase involved in the lignification of tracheary elements (TE) in roots	AT5G51890.1	1e-81	557.265	141.702	972.827	2.77933	6.33772e-20	2.01816e-16	2.77933
comp44882				1979.99	826.704	3133.29	1.92223	5.81843e-11	3.1845e-08	1.92223
comp44915	mutant has Altered vascular cell differentiation; LRR Receptor Kinase	AT1G55610.2	0	195.209	95.9836	294.434	1.61708	4.95865e-06	0.00056577	1.61708
comp49296	C-terminal domain phosphatase-like 3 (CPL3); FUNCTIONS IN: phosphoprotein phosphatase activity, CTD phosphatase activity; INVOLVED IN: response to salt stress; LOCATED IN: nucleus; EXPRESSED IN: 22 plant structures; EXPRESSED DURING: 12 growth stages; CONTAINS InterPro DOMAIN/s: FCP1-like phosphatase, phosphatase domain (InterPro:IPR011947), NLI interacting factor (InterPro:IPR004274), BRCT (Inte…	AT2G33540.1	4e-142	760.172	311.372	1208.97	1.95707	1.72347e-10	8.68629e-08	1.95707
comp49588	unknown protein	AT5G42765.1	3e-52	206.828	293.347	120.309	-1.28586	7.34824e-05	0.00510196	1.28586
comp50056				208.593	333.625	83.5621	-1.99731	1.8854e-06	0.000254987	1.99731
comp51197				93.5033	38.8544	148.152	1.93093	2.53938e-06	0.000323453	1.93093
comp53021				406.874	217.129	596.619	1.45826	6.49564e-06	0.000706613	1.45826
comp57274	P-loop containing nucleoside triphosphate hydrolases superfamily protein; FUNCTIONS IN: nucleoside-triphosphatase activity, nucleotide binding, ATP binding; INVOLVED IN: apoptosis; LOCATED IN: chloroplast; EXPRESSED IN: 12 plant structures; EXPRESSED DURING: 7 growth stages; CONTAINS InterPro DOMAIN/s: ATPase, AAA+ type, core (InterPro:IPR003593), NB-ARC (InterPro:IPR002182); BEST Arabidopsis tha…	AT5G56220.1	1e-176	709.166	420.022	998.311	1.24902	9.42285e-05	0.00630672	1.24902
comp57799				52.6598	6.73565	98.5839	3.87146	4.94301e-14	6.07522e-11	3.87146
comp57851	Encodes SPIKE1 (SPK1), the lone DOCK family guanine nucleotide exchange factor (GEF) in Arabidopsis. SPK1 is a peripheral membrane protein that accumulates at, and promotes the formation of, a specialized domain of the endoplasmic reticulum (ER) termed the ER exit site (ERES). SPK1 promotes polarized growth and cell-cell adhesion in the leaf epidermis. Mutant has seedling lethal; cotyledon, leaf-…	AT4G16340.1	0	665.535	345.122	985.947	1.5144	1.23147e-06	0.000180668	1.5144
comp59767				57.8152	4.47386	111.156	4.63493	1.64338e-17	3.38614e-14	4.63493
comp60717	Leucine-rich repeat protein kinase family protein; FUNCTIONS IN: protein serine/threonine kinase activity, protein kinase activity, ATP binding; INVOLVED IN: transmembrane receptor protein tyrosine kinase signaling pathway, protein amino acid phosphorylation; LOCATED IN: endomembrane system; EXPRESSED IN: 21 plant structures; EXPRESSED DURING: 14 growth stages; CONTAINS InterPro DOMAIN/s: Protein…	AT5G51560.1	9e-134	506.952	286.886	727.018	1.34151	1.38182e-05	0.0013135	1.34151
comp60899	unknown protein; FUNCTIONS IN: molecular_function unknown; INVOLVED IN: biological_process unknown; LOCATED IN: endomembrane system; BEST Arabidopsis thaliana protein match is: unknown protein (TAIR:AT2G47010.2); Has 70 Blast hits to 70 proteins in 13 species: Archae - 0; Bacteria - 0; Metazoa - 0; Fungi - 0; Plants - 69; Viruses - 0; Other Eukaryotes - 1 (source: NCBI BLink).	AT1G17030.1	2e-129	413.341	252.461	574.221	1.18555	0.000122327	0.00774217	1.18555
comp60977	transcription regulators; FUNCTIONS IN: transcription regulator activity; EXPRESSED IN: 25 plant structures; EXPRESSED DURING: 15 growth stages; CONTAINS InterPro DOMAIN/s: CCR4-Not complex component, Not1 (InterPro:IPR007196).	AT1G02080.2	0	1437.02	817.98	2056.06	1.32975	1.01425e-05	0.00102273	1.32975
comp61018	embryo defective 2247 (EMB2247); FUNCTIONS IN: valine-tRNA ligase activity, nucleotide binding, aminoacyl-tRNA ligase activity, ATP binding; INVOLVED IN: tRNA aminoacylation for protein translation, embryo development ending in seed dormancy; LOCATED IN: chloroplast stroma, chloroplast; EXPRESSED IN: 19 plant structures; EXPRESSED DURING: 13 growth stages; CONTAINS InterPro DOMAIN/s: tRNA-binding…	AT5G16715.1	0	878.948	543.077	1214.82	1.16151	0.000154257	0.0092869	1.16151
comp61365	glutathione reductase that is most likely localized in the chloroplast.	AT3G54660.1	1e-45	40.1143	11.8358	68.3929	2.53069	2.18836e-06	0.000286021	2.53069
comp62161	histone acetyltransferase HAC1	AT1G79000.1	0	779.491	436.549	1122.43	1.36241	1.00525e-05	0.00101881	1.36241
comp63036	TPR repeat-containing thioredoxin TTL1	AT1G53300.1	2e-142	592.261	368.847	815.675	1.14497	0.000160646	0.00958623	1.14497
comp63406	The enzyme encoded by this gene has been shown to complement the Saccharomyces cerevisiae coq3 mutation and, therefore, to have hexaprenyldihydroxybenzoate methyltransferase activity. It is however likely that, in Arabidopsis, the enzyme catalyzes the methylation of nonaprenyldihydroxybenzoate as it is the prevalent polyprenoid in this plant species. The enzyme is a mitochondrial-localized methyl…	AT2G30920.1	7e-98	202.131	114.316	289.946	1.34276	2.02739e-05	0.00180242	1.34276	yes
comp63560	P-glycoprotein 13 (PGP13); FUNCTIONS IN: ATPase activity, coupled to transmembrane movement of substances; INVOLVED IN: transport, transmembrane transport; LOCATED IN: integral to membrane; EXPRESSED IN: 9 plant structures; EXPRESSED DURING: 4 anthesis, petal differentiation and expansion stage; CONTAINS InterPro DOMAIN/s: ATPase, AAA+ type, core (InterPro:IPR003593), ABC transporter-like (InterP…	AT1G27940.1	0	1203.78	650.831	1756.73	1.43254	1.52935e-06	0.000216445	1.43254
comp63816	embryo defective 2016 (EMB2016); Has 4102 Blast hits to 3495 proteins in 322 species: Archae - 0; Bacteria - 116; Metazoa - 1947; Fungi - 730; Plants - 417; Viruses - 33; Other Eukaryotes - 859 (source: NCBI BLink).	AT3G05680.1	1e-164	808.142	379.166	1237.12	1.70608	3.06108e-08	7.91319e-06	1.70608
comp64444				14.2544	3.51369	24.9951	2.83059	0.000136359	0.00841652	2.83059
comp64555	DENN (AEX-3) domain-containing protein; CONTAINS InterPro DOMAIN/s: uDENN (InterPro:IPR005113), dDENN (InterPro:IPR005112), DENN (InterPro:IPR001194); BEST Arabidopsis thaliana protein match is: DENN (AEX-3) domain-containing protein (TAIR:AT2G20320.1); Has 35333 Blast hits to 34131 proteins in 2444 species: Archae - 798; Bacteria - 22429; Metazoa - 974; Fungi - 991; Plants - 531; Viruses - 0; Ot…	AT5G35560.1	5e-177	923.821	493.882	1353.76	1.45473	1.75798e-06	0.000243875	1.45473
comp64916	Transducin/WD40 repeat-like superfamily protein; FUNCTIONS IN: nucleotide binding; INVOLVED IN: biological_process unknown; LOCATED IN: cytosol; EXPRESSED IN: 25 plant structures; EXPRESSED DURING: 14 growth stages; CONTAINS InterPro DOMAIN/s: WD40 repeat 2 (InterPro:IPR019782), WD40 repeat-like-containing domain (InterPro:IPR011046), WD40 repeat, conserved site (InterPro:IPR019775), WD40-repeat-…	AT4G11270.1	4e-150	748.369	414.284	1082.45	1.38561	6.73454e-06	0.000722504	1.38561
comp65423	Transketolase; FUNCTIONS IN: catalytic activity, transketolase activity; INVOLVED IN: response to cadmium ion; LOCATED IN: chloroplast stroma, chloroplast; EXPRESSED IN: 25 plant structures; EXPRESSED DURING: 16 growth stages; CONTAINS InterPro DOMAIN/s: Transketolase, bacterial-like (InterPro:IPR005478), Transketolase, N-terminal (InterPro:IPR005474), Transketolase, C-terminal (InterPro:IPR00547…	AT2G45290.1	0	840.857	474.982	1206.73	1.34516	1.01886e-06	0.000153993	1.34516
comp65485	Encodes a putative metal-transporting P-type ATPase.	AT4G33520.2	0	852.096	448.545	1255.65	1.48511	1.53679e-06	0.000217059	1.48511
comp65617	Putative potassium transporter family	AT4G04850.2	0	664.658	376.763	952.553	1.33814	1.05933e-05	0.00105411	1.33814
comp66282				299.426	26.4393	572.412	4.4363	1.31399e-25	1.15066e-21	4.4363
comp67594	HECT ubiquitin protein ligase family protein	AT4G38600.1	0	867.668	507.139	1228.2	1.27609	2.24799e-05	0.00196121	1.27609
comp68200				8.68869	0.347701	17.0297	5.61406	0.000101023	0.00664533	5.61406
comp69279	beta-1,4-N-acetylglucosaminyltransferase	AT3G27540.1	4e-147	342.451	493.147	191.754	-1.36276	1.47841e-05	0.00138727	1.36276
comp71292	SCC1/REC8 ortholog that may be involved in mitosis and may represent a mitotic cohesin.	AT5G16270.1	7e-80	752.975	444.005	1061.95	1.25806	6.33275e-05	0.00456897	1.25806
comp73069	CONTAINS InterPro DOMAIN/s: Nucleolar 27S pre-rRNA processing, Urb2/Npa2 (InterPro:IPR018849); Has 58 Blast hits to 49 proteins in 21 species: Archae - 0; Bacteria - 2; Metazoa - 2; Fungi - 0; Plants - 44; Viruses - 3; Other Eukaryotes - 7 (source: NCBI BLink).	AT4G30150.1	3e-46	1057.21	648.527	1465.9	1.17655	0.000126011	0.00791161	1.17655
comp74102	The FUSED (FU) gene belongs to Ser/Thr protein kinase family and has a key role in the hedgehog signaling pathway known to control cell proliferation and patterning in fruit flies and humans . Arabidopsis thaliana genome has a single Fu gene. Cytokinesis-defective mutants, which we named two-in-one (tio), result from mutations in Arabidopsis Fu. Phenotypic analysis of tio mutants reveals an essen…	AT1G50240.2	0	607.882	327.652	888.112	1.43858	3.39147e-06	0.000413205	1.43858
comp76164				8.55358	0.676747	16.4304	4.60161	0.000134821	0.00832893	4.60161
comp77245	Encodes an enzyme thought to be involved in the hydrolysis of the &#945;-1,6 linkages during starch degradation in seed endosperm. However, a knockout mutant of Arabidopsis lacking limit dextrinase has normal rates of starch degradation in the leaf at night, indicating that more than one isoamylases might be involved in this process.	AT5G04360.1	0	635.026	369.356	900.696	1.28603	2.68897e-05	0.00228893	1.28603
comp77374				20.8904	4.96532	36.8155	2.89036	9.96753e-05	0.00658532	2.89036
comp78995				23.0448	0.918002	45.1715	5.62077	1.2503e-10	6.48824e-08	5.62077
comp80125	Encodes an A- type response Regulator that is primarily expressed in the root and is involved in cytokinin-mediated signalling.	AT2G41310.1	3e-42	412.504	693.548	131.459	-2.39938	1.91127e-11	1.18492e-08	2.39938
comp80816	Sulfur acceptor that interacts with and activates the cysteine desulfurases, AtSufS in plastids and AtNifS1 in mitochondria, and both activations are vital during embryogenesis. Dual localization in mitochondria and chloroplasts. Involved in Fe-S cluster biogenesis in mitochondria and plastids. Expressed in all major tissues, with higher expression in green parts. Its expression is light-dependen…	AT4G26500.1	7e-40	169.612	275.288	63.9364	-2.10623	5.21695e-10	2.34281e-07	2.10623	yes
comp81049	isolated from differential screening of a cDNA library from auxin-treated root culture. sequence does not show homology to any known proteins and is predicted to be extracellular.	AT2G34680.1	0	670.857	289.693	1052.02	1.86056	2.86677e-09	1.01946e-06	1.86056
comp81059	Squamosa promoter-binding protein-like (SBP domain) transcription factor family protein; FUNCTIONS IN: sequence-specific DNA binding transcription factor activity; INVOLVED IN: regulation of transcription; LOCATED IN: plasma membrane; EXPRESSED IN: 22 plant structures; EXPRESSED DURING: 13 growth stages; CONTAINS InterPro DOMAIN/s: Transcription factor, SBP-box (InterPro:IPR004333); BEST Arabidop…	AT1G76580.1	2e-68	1193.2	639.028	1747.37	1.45123	1.42891e-06	0.000204711	1.45123
comp81063	Encodes a major actin filament bundling protein that is involved in root hair growth through regulating actin organization in a Ca2+-dependent manner.	AT4G30160.1	0	381.202	221.28	541.124	1.29008	4.39527e-05	0.00341748	1.29008
comp81075	encodes a transmembrane protein with similarity to the sterol desaturase family at the N-terminus and to the short-chain dehydrogenase/reductase family at the C-terminus. Mutant analyses indicate this protein is involved in cuticle membrane and wax biosynthesis.	AT5G57800.1	4e-127	296.862	144.395	449.329	1.63775	1.30626e-06	0.000189072	1.63775
comp81103	The gene encodes phosphatidylinositol 3- kinase involved in the development and germination of pollen through the biosynthesis of phosphatidylinositol 3-phosphate (PI3P).	AT4G29380.1	0	421.322	206.376	636.268	1.62436	2.54823e-07	4.89092e-05	1.62436
comp81116	unknown protein; INVOLVED IN: biological_process unknown; LOCATED IN: cellular_component unknown; EXPRESSED IN: leaf; EXPRESSED DURING: LP.04 four leaves visible, LP.02 two leaves visible; Has 20 Blast hits to 19 proteins in 8 species: Archae - 0; Bacteria - 0; Metazoa - 0; Fungi - 0; Plants - 20; Viruses - 0; Other Eukaryotes - 0 (source: NCBI BLink).	AT4G39420.2	0	712.092	346.817	1077.37	1.63526	1.29661e-07	2.76936e-05	1.63526
comp81122				27.0378	3.44455	50.6311	3.87763	1.2299e-08	3.63553e-06	3.87763
comp81128	phosphate transporter 3;1 (PHT3;1); FUNCTIONS IN: binding; INVOLVED IN: transport, transmembrane transport; LOCATED IN: in 6 components; EXPRESSED IN: 27 plant structures; EXPRESSED DURING: 16 growth stages; CONTAINS InterPro DOMAIN/s: Mitochondrial substrate carrier (InterPro:IPR001993), Mitochondrial substrate/solute carrier (InterPro:IPR018108); BEST Arabidopsis thaliana protein match is: phos…	AT5G14040.1	5e-151	95.4941	30.0546	160.934	2.42081	1.21545e-09	4.83803e-07	2.42081
comp81132				114.596	35.0442	194.148	2.46991	1.92261e-10	9.54245e-08	2.46991
comp81209				142.762	21.8404	263.683	3.59373	5.12961e-20	1.71124e-16	3.59373
comp81241	A member of SHI gene family. Arabidopsis thaliana has ten members that encode proteins with a RING finger-like zinc finger motif. Despite being highly divergent in sequence, many of the SHI-related genes are partially redundant in function and synergistically promote gynoecium, stamen and leaf development in Arabidopsis. STY1/STY2 double mutants showed defective style, stigma as well as serrated …	AT3G51060.1	2e-30	368.453	161.868	575.038	1.82884	1.47755e-08	4.22494e-06	1.82884
comp81244	DNA-binding bromodomain-containing protein; FUNCTIONS IN: DNA binding; INVOLVED IN: biological_process unknown; LOCATED IN: cellular_component unknown; EXPRESSED IN: 21 plant structures; EXPRESSED DURING: 13 growth stages; CONTAINS InterPro DOMAIN/s: Bromodomain, conserved site (InterPro:IPR018359), Bromodomain (InterPro:IPR001487); BEST Arabidopsis thaliana protein match is: DNA-binding bromodom…	AT1G76380.1	7e-52	634.334	339.842	928.826	1.45055	3.87264e-06	0.000461397	1.45055
comp81300	Encodes a DCAF/DWD protein capable of interacting with DDB1 and associating with CUL4, likely as part of a nuclear ubiquitin ligase complex. DCAF1 appears to be required for plant embryogenesis and to affect several other developmental processes including leaf, shoot, and flower development.	AT4G31160.1	8e-172	630.631	293.774	967.488	1.71954	3.39142e-08	8.6396e-06	1.71954
comp81373	transcriptional regulator MED12, is dynamically expressed during embryogenesis and regulates both developmental timing and the radial pattern formation. Involved in flowering time. The mutant enhances the expression of the flowering time (FT) gene. A knockout mutant of this gene showed late-flowering phenotype.	AT4G00450.1	0	714.15	362.683	1065.62	1.55491	5.3337e-07	9.0038e-05	1.55491
comp81406				253.466	133.169	373.763	1.48887	6.86536e-06	0.000732054	1.48887
comp81439	EXORDIUM like 2 (EXL2); FUNCTIONS IN: molecular_function unknown; INVOLVED IN: biological_process unknown; LOCATED IN: cell wall, plant-type cell wall; EXPRESSED IN: 23 plant structures; EXPRESSED DURING: 13 growth stages; CONTAINS InterPro DOMAIN/s: Phosphate-induced protein 1 (InterPro:IPR006766); BEST Arabidopsis thaliana protein match is: EXORDIUM like 4 (TAIR:AT5G09440.1); Has 1807 Blast hit…	AT5G64260.1	2e-61	279.415	411.938	146.891	-1.48768	6.87397e-07	0.000111473	1.48768
comp81472	Heavy metal transport/detoxification superfamily protein ; FUNCTIONS IN: copper ion binding, metal ion binding; INVOLVED IN: copper ion transport, metal ion transport; LOCATED IN: cellular_component unknown; CONTAINS InterPro DOMAIN/s: Heavy metal transport/detoxification protein (InterPro:IPR006121); BEST Arabidopsis thaliana protein match is: Heavy metal transport/detoxification superfamily pro…	AT1G06330.1	3e-20	130.287	71.7938	188.78	1.39478	1.48217e-05	0.00138727	1.39478
comp81497	Encodes a membrane localized protein with similarity to receptor kinases which is involved in epidermal cell differentiation. Flowers of mutants have disorganized ovule integument growth and abnormal sepal margins. In the roots, mutants initiate more lateral roots but fewer laterals actually emerge due to defects in lateral root formation. Mutants also display disorganized columella. The root phe…	AT3G59420.1	6e-60	158.06	83.7857	232.334	1.47142	3.54996e-05	0.00289856	1.47142
comp81533	Adenine nucleotide alpha hydrolases-like superfamily protein	AT3G11930.1	6e-44	1019.42	1470.71	568.14	-1.37219	2.04658e-06	0.000273617	1.37219
comp81550	Encodes a cytosolic methionine synthase, involved in methionine regeneration via the activated methyl cycle (or SAM cycle)	AT3G03780.3	3e-15	21.6788	5.4983	37.8593	2.78359	3.27931e-05	0.00270915	2.78359	yes
comp81559	transcription factor jumonji (jmjC) domain-containing protein; FUNCTIONS IN: sequence-specific DNA binding transcription factor activity; LOCATED IN: nucleus; EXPRESSED IN: 21 plant structures; EXPRESSED DURING: 14 growth stages; CONTAINS InterPro DOMAIN/s: Transcription factor jumonji/aspartyl beta-hydroxylase (InterPro:IPR003347), PLU-1-like (InterPro:IPR013637), Zinc finger, PHD-type, conserve…	AT1G63490.1	0	2560.74	1204.1	3917.39	1.70193	6.69615e-09	2.13869e-06	1.70193
comp81607	Leucine-rich repeat protein kinase family protein; FUNCTIONS IN: protein serine/threonine kinase activity, kinase activity, ATP binding; INVOLVED IN: transmembrane receptor protein tyrosine kinase signaling pathway, protein amino acid phosphorylation; LOCATED IN: chloroplast stroma, chloroplast, plasma membrane, plant-type cell wall; EXPRESSED IN: 11 plant structures; EXPRESSED DURING: 6 growth s…	AT2G01210.1	2e-136	132.427	60.3222	204.533	1.76157	1.24748e-06	0.000181691	1.76157
comp81609				85.3075	40.9178	129.697	1.66435	6.2183e-05	0.00451429	1.66435
comp81621				27.8557	7.0882	48.6232	2.77815	2.72066e-06	0.000339143	2.77815
comp81791	Membrane-bound protein serine/threonine kinase that functions as blue light photoreceptor in redundancy with PHO1. Involved in stomatal opening, chloroplast movement and phototropism. Mediates blue light-induced growth enhancements. PHOT1 and PHOT2 mediate blue light-dependent activation of the plasma membrane H+-ATPase in guard cell protoplasts. PHOT2 possesses two LOV (LOV1 and LOV2, for light-…	AT5G58140.1	0	1246.87	464.46	2029.28	2.12734	2.42894e-13	2.57821e-10	2.12734
comp81821	REN1, a Rho GTPase activating protein.	AT5G19390.4	0	1316.06	780.338	1851.79	1.24675	2.54644e-05	0.00218619	1.24675
comp81842	RNI-like superfamily protein; INVOLVED IN: signal transduction; LOCATED IN: endomembrane system; EXPRESSED IN: 7 plant structures; EXPRESSED DURING: 4 anthesis, F mature embryo stage, petal differentiation and expansion stage, E expanded cotyledon stage, D bilateral stage; CONTAINS InterPro DOMAIN/s: Leucine-rich repeat-containing N-terminal domain, type 2 (InterPro:IPR013210), Leucine-rich repea…	AT4G03010.1	1e-108	1104.02	644.877	1563.16	1.27737	2.01024e-05	0.00179172	1.27737
comp81850	DNA-dependent RNA polymerase II; the ortholog of budding yeast RPB2 and a homolog of the E. coli RNA polymerase beta subunit.	AT4G21710.1	0	1803.48	1126.08	2480.88	1.13954	0.000144586	0.0088464	1.13954	yes
comp81854	Ribosomal protein L10 family protein; FUNCTIONS IN: structural constituent of ribosome; INVOLVED IN: translational elongation, translation, ribosome biogenesis; LOCATED IN: cytosolic ribosome, ribosome; EXPRESSED IN: 19 plant structures; EXPRESSED DURING: 13 growth stages; CONTAINS InterPro DOMAIN/s: Ribosomal protein 60S (InterPro:IPR001813), Ribosomal protein L10 (InterPro:IPR001790); BEST Arab…	AT2G40010.1	1e-25	838.539	501.782	1175.3	1.22789	5.20564e-06	0.000590108	1.22789
comp81863	Protein of unknown function (DUF3414); FUNCTIONS IN: molecular_function unknown; INVOLVED IN: biological_process unknown; LOCATED IN: chloroplast; EXPRESSED IN: 25 plant structures; EXPRESSED DURING: 13 growth stages; CONTAINS InterPro DOMAIN/s: Protein of unknown function DUF3414 (InterPro:IPR021827); Has 203 Blast hits to 190 proteins in 76 species: Archae - 0; Bacteria - 0; Metazoa - 120; Fung…	AT5G51200.1	0	2574.91	1401.03	3748.8	1.41995	4.39097e-05	0.00341748	1.41995
comp81868	Encodes a member of the armadillo/beta-catenin repeat kinesin motor family. Mutants have twisted roots due to abnormal cell file rotation; the phenotype is dependent on microtubules.	AT1G01950.1	0	1058.47	601.857	1515.08	1.3319	1.71949e-05	0.0015685	1.3319
comp81879				623.665	77.8457	1169.48	3.90911	4.1956e-33	5.87854e-29	3.90911
comp81880				1127.88	551.396	1704.37	1.62807	1.73585e-08	4.8449e-06	1.62807
comp81881	Encodes PCFS4 (Pcf11p-similar protein 4), a homolog of yeast polyadenylation factor Protein 1 of Cleavage Factor (Pcf11p). Regulates FCA (AT4G16280) mRNA polyadenylation. Promotes flowering time.	AT4G04885.1	1e-40	1166.83	672.915	1660.74	1.30333	1.39213e-05	0.00131793	1.30333
comp81882	Di-glucose binding protein with Kinesin motor domain; FUNCTIONS IN: microtubule motor activity, ATP binding; INVOLVED IN: microtubule-based movement; EXPRESSED IN: 20 plant structures; EXPRESSED DURING: 10 growth stages; CONTAINS InterPro DOMAIN/s: Kinesin, motor region, conserved site (InterPro:IPR019821), Malectin/receptor-like protein kinase (InterPro:IPR021720), Kinesin, motor domain (InterPr…	AT2G22610.2	0	1620.01	883.224	2356.79	1.41597	1.21323e-06	0.000178935	1.41597
comp81886	Encodes a tRNase Z.	AT3G16260.1	0	1985.56	925.283	3045.84	1.71887	6.44257e-09	2.08954e-06	1.71887
comp81901				931.478	1362.96	499.997	-1.44675	1.00636e-05	0.00101881	1.44675
comp81918	kinesin superfamily of motor proteins. recessive mutations have reduced number of trichome branches.	AT5G65930.1	0	2073.27	1260.57	2885.97	1.19498	6.10247e-05	0.00445328	1.19498	yes
comp81924	WD-40 repeat family protein / beige-related; FUNCTIONS IN: nucleotide binding; INVOLVED IN: biological_process unknown; LOCATED IN: cellular_component unknown; EXPRESSED IN: 25 plant structures; EXPRESSED DURING: 14 growth stages; CONTAINS InterPro DOMAIN/s: WD40 repeat 2 (InterPro:IPR019782), WD40 repeat-like-containing domain (InterPro:IPR011046), Beige/BEACH (InterPro:IPR000409), WD40-repeat-c…	AT2G45540.1	0	3392.06	1374.09	5410.02	1.97716	1.39686e-11	9.40947e-09	1.97716
comp81926	isolated from differential screening of a cDNA library from auxin-treated root culture. sequence does not show homology to any known proteins and is predicted to be extracellular.	AT2G34680.1	0	2796.85	1228.3	4365.39	1.82944	5.34999e-10	2.38725e-07	1.82944
comp81945	light-dependent NADPH:protochlorophyllide oxidoreductase B	AT4G27440.2	3e-175	1383.53	1970.52	796.534	-1.30677	2.07023e-06	0.000275204	1.30677
comp81950	Sec14p-like phosphatidylinositol transfer family protein; FUNCTIONS IN: phosphatidylinositol transporter activity, transporter activity; INVOLVED IN: transport; LOCATED IN: plasma membrane; EXPRESSED IN: 23 plant structures; EXPRESSED DURING: 14 growth stages; CONTAINS InterPro DOMAIN/s: Cellular retinaldehyde-binding/triple function, C-terminal (InterPro:IPR001251), Cellular retinaldehyde-bindin…	AT4G39170.1	2e-139	1225.19	745.159	1705.22	1.19434	7.25618e-05	0.00505307	1.19434
comp81955	MINICHROMOSOME MAINTENANCE 4 (MCM4); FUNCTIONS IN: nucleoside-triphosphatase activity, DNA-dependent ATPase activity, DNA binding, nucleotide binding, ATP binding; INVOLVED IN: cell proliferation, DNA-dependent DNA replication initiation, DNA unwinding involved in replication; LOCATED IN: nuclear chromatin; EXPRESSED IN: 24 plant structures; EXPRESSED DURING: 16 growth stages; CONTAINS InterPro D…	AT2G16440.1	0	3397.38	2033.5	4761.26	1.22738	4.63554e-05	0.00354915	1.22738
comp81957	topoisomerase II that is highly expressed in young seedlings. The protein is localized in the nucleus and gene expression levels are increased in proliferative tissues.	AT3G23890.1	6e-35	16.4086	3.20815	29.609	3.20622	4.50952e-05	0.00347546	3.20622
comp81980	RNA binding protein;RNA binding; FUNCTIONS IN: RNA binding; INVOLVED IN: mRNA processing, RNA processing; LOCATED IN: nucleolus, plasma membrane; EXPRESSED IN: 22 plant structures; EXPRESSED DURING: 13 growth stages; CONTAINS InterPro DOMAIN/s: Nucleic acid-binding, OB-fold (InterPro:IPR012340), Nucleic acid-binding, OB-fold-like (InterPro:IPR016027), Ribosomal protein S1, RNA-binding domain (Int…	AT3G11964.1	0	1589.4	892.585	2286.21	1.3569	6.06846e-05	0.00443307	1.3569
comp81982	Encodes a protein that is predicted to act as a 1-phosphatidylinositol-3-phosphate (PtdIns3P) 5-kinase based on its homology to Fab1 from yeast. It contains an FYVE domain required for binding to PtdIns3P-containing membranes in yeast, as well as a Cpn60_TCP1 homology domain plus a kinase domain. fab1a/fab1b pollen grains not viable and have defective vacuolar organization. FAB1A and FAB1B comple…	AT4G33240.1	0	892.568	473.107	1312.03	1.47156	4.74518e-07	8.22843e-05	1.47156
comp81987	methyl-CpG-binding domain protein. Has sequence similarity to human MBD proteins. Involved in the modification of the FLC chromatin acetylation state to affect FLC expression. Mutants show an early flowering, and enhanced shoot branching phenotypes.	AT3G01460.1	4e-101	1263.03	493.131	2032.92	2.04351	5.46902e-12	4.25708e-09	2.04351
comp81990	component of the putative Arabidopsis THO/TREX complex: THO1 or HPR1 (At5g09860), THO2 (At1g24706), THO3 or TEX1 (At5g56130), THO5 (At5g42920, At1g45233), THO6 (At2g19430), and THO7 (At5g16790, At3g02950). THO/TREX complexes in animals have been implicated in the transport of mRNA precursors. Mutants of THO3/TEX1, THO1, THO6 accumulate reduced amount of small interfering (si)RNA, suggesting a rol…	AT1G24706.2	0	1309.54	652.851	1966.22	1.5906	1.12936e-07	2.46476e-05	1.5906
comp81999				292.138	429.34	154.936	-1.47045	1.28684e-06	0.000186648	1.47045
comp82003	ROOT GROWTH DEFECTIVE 3 (RGD3); FUNCTIONS IN: binding, helicase activity, DNA binding, nucleic acid binding, ATP binding; EXPRESSED IN: 23 plant structures; EXPRESSED DURING: 14 growth stages; CONTAINS InterPro DOMAIN/s: Armadillo-like helical (InterPro:IPR011989), DEAD-like helicase, N-terminal (InterPro:IPR014001), Armadillo-type fold (InterPro:IPR016024), DNA/RNA helicase, C-terminal (InterPro…	AT3G54280.1	0	1651.85	812.253	2491.45	1.61698	3.14986e-08	8.08304e-06	1.61698
comp82007	DNAJ heat shock N-terminal domain-containing protein; FUNCTIONS IN: unfolded protein binding, heat shock protein binding; INVOLVED IN: protein folding; LOCATED IN: cellular_component unknown; EXPRESSED IN: 24 plant structures; EXPRESSED DURING: 15 growth stages; CONTAINS InterPro DOMAIN/s: Molecular chaperone, heat shock protein, Hsp40, DnaJ (InterPro:IPR015609), Heat shock protein DnaJ, N-termin…	AT5G53150.1	4e-45	900.452	543.083	1257.82	1.21168	7.63601e-05	0.00526046	1.21168
comp82038	TRAF-like superfamily protein; FUNCTIONS IN: molecular_function unknown; INVOLVED IN: biological_process unknown; LOCATED IN: cellular_component unknown; EXPRESSED IN: 24 plant structures; EXPRESSED DURING: 15 growth stages; CONTAINS InterPro DOMAIN/s: TRAF-like (InterPro:IPR008974), MATH (InterPro:IPR002083); BEST Arabidopsis thaliana protein match is: TRAF-like superfamily protein (TAIR:AT1G043…	AT5G43560.2	1e-132	743.652	404.922	1082.38	1.4185	2.15709e-06	0.000282991	1.4185
comp82039	kinesin motor family protein	AT3G12020.1	0	1316.28	769.396	1863.16	1.27596	3.43576e-05	0.00281845	1.27596
comp82043				610.663	953.2	268.125	-1.82987	2.29666e-07	4.57088e-05	1.82987
comp82048	LRX1 (LEUCINE-RICH REPEAT/EXTENSIN 1) which acts synergistically with LRX1 in root hair cell morphogenesis.	AT1G62440.1	7e-127	2886	1538.13	4233.86	1.46079	1.80704e-06	0.000248224	1.46079
comp82055	Putative homolog of yeast Vps54. Thought to associate with POK and ATVPS53 in a plant GARP-like complex involved in the membrane trafficking system.	AT4G19490.2	0	1496.45	905.755	2087.14	1.20433	7.19255e-05	0.00502374	1.20433
comp82057	P-loop containing nucleoside triphosphate hydrolases superfamily protein; FUNCTIONS IN: nucleoside-triphosphatase activity, ATPase activity, nucleotide binding, ATP binding; INVOLVED IN: biological_process unknown; LOCATED IN: mitochondrion; EXPRESSED IN: 23 plant structures; EXPRESSED DURING: 15 growth stages; CONTAINS InterPro DOMAIN/s: ATPase, AAA-type, core (InterPro:IPR003959), ATPase, AAA+ …	AT3G19740.1	9e-152	1384.41	866.688	1902.14	1.13404	0.000146491	0.00892399	1.13404
comp82082	PHRAGMOPLAST ORIENTING KINESIN 2 is one of the two Arabidopsis homologs isolated in yeast two-hybrid screen for interaction partners of maize gene TANGLED1 (TAN1). Based on sequence homology in their motor domains, POK1 and POK2 belong to the kinesin-12 class which also includes the well-characterized group of phragmoplast-associated kinesins AtPAKRPs. Both kinesins are composed of an N-terminal …	AT3G19050.1	0	3213.49	1487.35	4939.63	1.73166	1.24058e-07	2.67416e-05	1.73166
comp82085	Nucleus encoded plastid RNA polymerase. Localized in mitochondria and chloroplast.	AT5G15700.1	0	1476.15	811.902	2140.4	1.3985	2.70245e-06	0.000338077	1.3985
comp82087	Encodes a ubiquitin-specific protease.	AT5G06600.3	3e-36	1432.64	696.585	2168.69	1.63845	4.64042e-08	1.102e-05	1.63845
comp82092	Plant protein of unknown function (DUF936); FUNCTIONS IN: molecular_function unknown; INVOLVED IN: biological_process unknown; LOCATED IN: cellular_component unknown; EXPRESSED IN: cultured cell; CONTAINS InterPro DOMAIN/s: Protein of unknown function DUF936, plant (InterPro:IPR010341); BEST Arabidopsis thaliana protein match is: Plant protein of unknown function (DUF936) (TAIR:AT3G14170.1); Has …	AT1G08760.1	3e-46	1220.27	660.625	1779.92	1.42991	1.6814e-06	0.000234645	1.42991
comp82094	Encodes a phosphoinositide phosphatase. The sac9 null mutant accumulates elevated levels of PtdIns(4,5)P2 and Ins(1,4,5)P3. The mutant plants have characteristics of constitutive stress responses.	AT3G59770.1	0	1652.08	1041.45	2262.7	1.11946	0.000133675	0.00828735	1.11946
comp82095	Acyl-CoA N-acyltransferase with RING/FYVE/PHD-type zinc finger domain; FUNCTIONS IN: DNA binding, zinc ion binding; INVOLVED IN: regulation of transcription, DNA-dependent; LOCATED IN: nucleus; EXPRESSED IN: 23 plant structures; EXPRESSED DURING: 15 growth stages; CONTAINS InterPro DOMAIN/s: Zinc finger, PHD-type, conserved site (InterPro:IPR019786), Zinc finger, PHD-type (InterPro:IPR001965), Zi…	AT2G37520.1	4e-148	1276.37	573.282	1979.46	1.78779	3.08407e-09	1.08029e-06	1.78779
comp82110	(d)NTP-dependent 3'->5' DNA helicase. This protein can also disrupt D loop structures and may mediate branch migration of Holliday junctions when tested in vitro. The unwinding activity of the enzyme depends on the presence of divalent cations (Mg2+, Mn2+, or Ca2+, but not Zn2+).(d)NTPs are also required with ATP and dATP supporting the greatest amount of DNA unwinding in vitro.	AT1G31360.1	2e-100	1547.25	855.064	2239.44	1.38903	2.83911e-06	0.000350787	1.38903
comp82129	Encodes a dual-targeted protein believed to act as a pyruvate, orthophosphate dikinase. These enzymes are normally associated with C4 photosynthesis which does not occur in Arabidopsis. However, PPDK may play a role in remobilizing nitrogen during leaf senescence in Arabidopsis. The product of the long transcript (.1 gene model) was shown to be targeted to the chloroplast, whereas the shorter tra…	AT4G15530.6	0	3921.76	2082.06	5761.46	1.46843	2.70026e-07	5.12654e-05	1.46843
comp82157	DNA GYRASE A (GYRA); FUNCTIONS IN: DNA topoisomerase activity, catalytic activity, ATP binding; INVOLVED IN: DNA topological change, DNA metabolic process; LOCATED IN: mitochondrion, chloroplast, nucleoid; EXPRESSED IN: 22 plant structures; EXPRESSED DURING: 13 growth stages; CONTAINS InterPro DOMAIN/s: DNA gyrase, subunit A (InterPro:IPR005743), DNA topoisomerase, type IIA, subunit A/C-terminal …	AT3G10690.1	0	2139.27	1308.66	2969.89	1.18232	0.000164444	0.00977047	1.18232
comp82159	chromomethylase involved in methylating cytosine residues at non-CG sites. Involved in preferentially methylating transposon-related sequences, reducing their mobility. CMT3 interacts with an Arabidopsis homologue of HP1 (heterochromatin protein 1), which in turn interacts with methylated histones. Involved in gene silencing.	AT1G69770.1	2e-39	2414.94	1467.96	3361.91	1.19547	4.94886e-05	0.00375213	1.19547
comp82159	Encodes a chromomethylase involved in methylating cytosine residues at non-CG sites. Involved in preferentially methylating transposon-related sequences, reducing their mobility. CMT3 interacts with an Arabidopsis homologue of HP1 (heterochromatin protein 1), which in turn interacts with methylated histones. Involved in gene silencing.	AT1G69770.1	2e-39	1192.1	759.522	1624.68	1.09699	9.41069e-05	0.00630672	1.09699
comp82167	unknown protein; Has 25732 Blast hits to 16979 proteins in 961 species: Archae - 144; Bacteria - 1801; Metazoa - 12681; Fungi - 1868; Plants - 912; Viruses - 94; Other Eukaryotes - 8232 (source: NCBI BLink).	AT3G15550.1	8e-107	1548.82	658.465	2439.18	1.88922	2.06694e-10	9.98632e-08	1.88922
comp82168	Encodes a peroxisomal protein of the ATP binding cassette (ABC) transporter class (PMP subfamily) with significant identity to the human X-linked adrenoleukodystrophy protein (ALDP). The gene product promotes germination and represses embryo dormancy. ABI3, ABA1, FUS3 and LEC1 are epistatic to this gene. Mutants accumulate fatty acyl CoA suggesting a defect in uptake of fatty acyl CoA into the pe…	AT4G39850.1	0	3507.79	1868.16	5147.42	1.46223	4.5948e-07	8.02726e-05	1.46223
comp82182	ARIA; armadillo repeat protein involved in the abscisic acid response. The protein interacts with a transcription factor, ABF2, which controls ABA-dependent gene expression via the G-box-type ABA-responsive elements.http://www.plantphysiology.org/content/136/3/3639.short	AT5G19330.1	0	1999.47	1239.12	2759.82	1.15526	8.42457e-05	0.00571337	1.15526
comp82182	ARIA; armadillo repeat protein involved in the abscisic acid response. The protein interacts with a transcription factor, ABF2, which controls ABA-dependent gene expression via the G-box-type ABA-responsive elements.	AT5G19330.1	0	1999.47	1239.12	2759.82	1.15526	8.42457e-05	0.00571337	1.15526
comp82189	Encodes a nuclear coiled-coil protein related to the carrot peripheral nuclear protein NMCP1 that is involved in the determination of plant nuclear structure.	AT1G13220.2	3e-55	3064.11	1431.01	4697.22	1.71478	9.35587e-09	2.82515e-06	1.71478
comp82195	belongs to cyclophilin family	AT4G34870.1	2e-53	7583.89	3929.45	11238.3	1.51603	1.36414e-07	2.8785e-05	1.51603
comp82200	H(+)-ATPase 11	AT2G44710.1	8e-67	11454.9	7009.57	15900.3	1.18165	3.67475e-05	0.00298167	1.18165
comp82229	60S ribosomal protein L8	AT4G36130	1e-153	5397.87	7558.54	3237.2	-1.22336	1.73266e-05	0.00157845	1.22336
comp82251	eukaryotic translation initiation factor 2 (eIF-2) family protein; FUNCTIONS IN: translation factor activity, nucleic acid binding, GTP binding, GTPase activity; LOCATED IN: plasma membrane; EXPRESSED IN: 25 plant structures; EXPRESSED DURING: 15 growth stages; CONTAINS InterPro DOMAIN/s: Small GTP-binding protein (InterPro:IPR005225), Translation elongation factor EFTu/EF1A, domain 2 (InterPro:I…	AT1G76810.1	0	7569.6	4394.62	10744.6	1.2898	1.30718e-05	0.00125103	1.2898
comp82278	argonaute 1	AT1G48410.1	0	3081.06	1715.7	4446.42	1.37385	2.79075e-06	0.000345422	1.37385
comp82287	homolog of Drosophila timeless an essential component of the molecular circadian clock	AT5G52910.1	5e-110	1847.39	952.502	2742.28	1.52558	2.4733e-07	4.81304e-05	1.52558
comp82308	embryo defective 2083 (EMB2083); FUNCTIONS IN: in 8 functions; INVOLVED IN: embryo development ending in seed dormancy; LOCATED IN: chloroplast, chloroplast envelope; EXPRESSED IN: 22 plant structures; EXPRESSED DURING: 13 growth stages; CONTAINS InterPro DOMAIN/s: ATPase, AAA+ type, core (InterPro:IPR003593), ATPase, AAA-type, core (InterPro:IPR003959), Peptidase M41 (InterPro:IPR000642), Peptid…	AT3G16290.1	5e-179	2314.95	1371.2	3258.7	1.24886	4.02736e-05	0.00317726	1.24886
comp82318	SEC24a/ERMO2. Required for endoplasmic reticulum (ER) morphology.	AT3G07100.1	0	2492.83	1538.98	3446.69	1.16324	0.000105032	0.00683839	1.16324
comp82359	formylglycinamidine ribonucleotide synthase an enzyme involved in de novo purine biosynthesis. PUR4 is localizes to the chloroplast and mitochondria. Loss of PUR4 function affects male but not female gametophyte development.	AT1G74260.1	0	3143.23	1663.17	4623.29	1.47499	5.63318e-07	9.39615e-05	1.47499
comp82380	LOCATED IN: vacuole; EXPRESSED IN: 23 plant structures; EXPRESSED DURING: 13 growth stages; BEST Arabidopsis thaliana protein match is: FBD, F-box and Leucine Rich Repeat domains containing protein (TAIR:AT1G22000.1); Has 84739 Blast hits to 38714 proteins in 2257 species: Archae - 1436; Bacteria - 11314; Metazoa - 40747; Fungi - 7706; Plants - 4675; Viruses - 308; Other Eukaryotes - 18553 (sourc…	AT1G22060.1	7e-35	3164.35	1726.77	4601.93	1.41416	5.72153e-06	0.000637245	1.41416
comp82382	AHA11-ATPASE 11	AT5G62670.1	0	3321.87	2038.52	4605.21	1.17574	3.44315e-05	0.00282121	1.17574
comp82445	HTL belonging to the alpha/beta fold hydrolase	AT4G37470.1	4e-119	1879.12	2711.79	1046.45	-1.37374	5.55586e-07	9.2893e-05	1.37374
comp82448	unknown protein; FUNCTIONS IN: molecular_function unknown; INVOLVED IN: biological_process unknown; LOCATED IN: cellular_component unknown; EXPRESSED IN: 23 plant structures; EXPRESSED DURING: 13 growth stages; CONTAINS InterPro DOMAIN/s: Protein of unknown function DUF1740 (InterPro:IPR013633); BEST Arabidopsis thaliana protein match is: unknown protein (TAIR:AT3G17712.1); Has 409 Blast hits to …	AT3G17740.1	0	678.455	401.172	955.738	1.25239	3.73283e-05	0.00301623	1.25239
comp82458	P-glycoprotein 2 (PGP2); FUNCTIONS IN: ATPase activity, coupled to transmembrane movement of substances; INVOLVED IN: transport, transmembrane transport; LOCATED IN: membrane; EXPRESSED IN: 22 plant structures; EXPRESSED DURING: 13 growth stages; CONTAINS InterPro DOMAIN/s: ATPase, AAA+ type, core (InterPro:IPR003593), ABC transporter-like (InterPro:IPR003439), ABC transporter, transmembrane doma…	AT4G25960.1	0	737.263	428.365	1046.16	1.28819	2.89513e-05	0.00244363	1.28819
comp82497	Galactose oxidase/kelch repeat superfamily protein; CONTAINS InterPro DOMAIN/s: Galactose oxidase/kelch, beta-propeller (InterPro:IPR011043), Kelch repeat type 1 (InterPro:IPR006652), Kelch repeat type 2 (InterPro:IPR011498), Kelch-type beta propeller (InterPro:IPR015915); BEST Arabidopsis thaliana protein match is: Galactose oxidase/kelch repeat superfamily protein (TAIR:AT1G74150.1); Has 30201 …	AT1G18610.1	7e-158	834.099	486.347	1181.85	1.28099	1.70269e-05	0.00155926	1.28099
comp82508				1131.97	650.091	1613.85	1.31179	1.02343e-05	0.00102689	1.31179
comp82510	molecular_function unknown; INVOLVED IN: biological_process unknown; EXPRESSED IN: 21 plant structures; EXPRESSED DURING: 13 growth stages; CONTAINS InterPro DOMAIN/s: Prefoldin (InterPro:IPR009053), Protein of unknown function DUF869, plant (InterPro:IPR008587); BEST Arabidopsis thaliana protein match is: Plant protein of unknown function (DUF869) (TAIR:AT1G19835.2).	AT1G47900.2	3e-45	616.475	331.971	900.98	1.44044	6.29241e-07	0.000103479	1.44044
comp82512				158.308	229.086	87.5301	-1.38804	1.49378e-05	0.00139345	1.38804
comp82523	cleavage and polyadenylation specificity factor 160 (CPSF160); FUNCTIONS IN: nucleic acid binding; INVOLVED IN: mRNA cleavage, mRNA polyadenylation; LOCATED IN: nucleus; EXPRESSED IN: 21 plant structures; EXPRESSED DURING: 13 growth stages; CONTAINS InterPro DOMAIN/s: Cleavage/polyadenylation specificity factor, A subunit, C-terminal (InterPro:IPR004871); BEST Arabidopsis thaliana protein match i…	AT5G51660.1	0	756.93	438.019	1075.84	1.2964	1.93731e-05	0.00173555	1.2964
comp82530				859.156	462.967	1255.34	1.4391	2.68352e-06	0.000336309	1.4391
comp82535	Encodes an A- type response Regulator that is primarily expressed in the root and is involved in cytokinin-mediated signalling.	AT2G41310.1	2e-48	480.905	774.411	187.4	-2.04698	2.13921e-11	1.30317e-08	2.04698
comp82548	SABRE, maize apt1, putative gene of unknown function, homologous to maize apt1 gene. Required for normal cell expansion in the root cortex. The sabre mutation results in abnormal cell expansion. Encodes a rare message; very low level of expression was detected in roots and shoots.	AT1G58250.2	0	1263.04	560.291	1965.79	1.81086	1.34954e-09	5.28176e-07	1.81086
comp82581				162.412	94.7132	230.11	1.28069	4.48284e-05	0.00346633	1.28069
comp82616				64.8822	15.9474	113.817	2.83533	5.54702e-10	2.43929e-07	2.83533
comp82636	DExD&#8260;H box RNA helicase, involved in the regulation of K+ deprivation stress response.	AT3G46960.1	0	581.238	339.698	822.778	1.27625	4.44778e-05	0.00344683	1.27625
comp82667				740.368	319.023	1161.71	1.86452	2.53357e-09	9.10213e-07	1.86452
comp82703	Encodes a putative transcription factor, member of the R2R3 factor gene family (MYB120).	AT5G55020.1	4e-54	372.254	181.789	562.718	1.63014	5.23783e-08	1.22485e-05	1.63014
comp82704				138.646	47.4985	229.794	2.27439	7.01549e-10	2.97865e-07	2.27439
comp82717				191.987	63.536	320.437	2.3344	1.65932e-12	1.48817e-09	2.3344
comp82723	pyruvate dehydrogenase E1a-like subunit. 81% identical to a previously characterized Arabidopsis mitochondrial PDH E1a-subunit, At1g59900. Serine 296 phosphorylation of IAR4 has critical function in root hair formation and root development. Changing Ser296 in IAR4 to Ala resulted in a phenotype intermediate between mutant and wild-type, while substitution to Asp was either lethal or caused an ext…	AT1G24180.1	2e-108	259.37	151.163	367.576	1.28194	7.40051e-06	0.000781976	1.28194
comp82726				231.544	110.523	352.565	1.67354	3.5245e-07	6.48065e-05	1.67354
comp82755	GRAS family transcription factor; CONTAINS InterPro DOMAIN/s: Transcription factor GRAS (InterPro:IPR005202); BEST Arabidopsis thaliana protein match is: GRAS family transcription factor (TAIR:AT3G54220.1); Has 2506 Blast hits to 2453 proteins in 309 species: Archae - 0; Bacteria - 4; Metazoa - 16; Fungi - 0; Plants - 2441; Viruses - 0; Other Eukaryotes - 45 (source: NCBI BLink).	AT1G63100.1	1e-92	441.741	240.869	642.613	1.4157	3.80729e-06	0.000454384	1.4157
comp82761	Protein of unknown function (DUF3133); CONTAINS InterPro DOMAIN/s: Protein of unknown function DUF3133 (InterPro:IPR021480); BEST Arabidopsis thaliana protein match is: Protein of unknown function (DUF3133) (TAIR:AT1G01440.1); Has 1545 Blast hits to 1451 proteins in 231 species: Archae - 0; Bacteria - 62; Metazoa - 476; Fungi - 316; Plants - 452; Viruses - 2; Other Eukaryotes - 237 (source: NCBI …	AT4G01090.1	5e-46	1012.43	551.22	1473.65	1.41869	3.23847e-06	0.000395251	1.41869
comp82771	armadillo/beta-catenin repeat kinesin motor family. Mutants have twisted roots due to abnormal cell file rotation; the phenotype is dependent on microtubules.	AT1G01950.1	9e-161	596.659	329.402	863.917	1.39104	9.45456e-06	0.000971186	1.39104
comp82783	RAD4; FUNCTIONS IN: damaged DNA binding; INVOLVED IN: nucleotide-excision repair; LOCATED IN: nucleus, chloroplast; EXPRESSED IN: 24 plant structures; EXPRESSED DURING: 15 growth stages; CONTAINS InterPro DOMAIN/s: Transglutaminase-like (InterPro:IPR002931), DNA repair protein Rad4, DNA-binding domain 1 (InterPro:IPR018326), DNA repair protein Rad4, DNA-binding domain 3 (InterPro:IPR018328), DNA …	AT5G16630.2	6e-88	789.097	458.03	1120.16	1.2902	2.93964e-05	0.00247226	1.2902
comp82787	trehalose-6-phosphate synthase	AT1G78580.1	0	800.361	489.241	1111.48	1.18387	0.00012693	0.00794654	1.18387
comp82810	P-loop containing nucleoside triphosphate hydrolases superfamily protein; FUNCTIONS IN: microtubule motor activity, ATP binding; INVOLVED IN: microtubule-based movement; LOCATED IN: phragmoplast; EXPRESSED IN: 13 plant structures; EXPRESSED DURING: 7 growth stages; CONTAINS InterPro DOMAIN/s: Kinesin, motor domain (InterPro:IPR001752); BEST Arabidopsis thaliana protein match is: kinesin 1 (TAIR:A…	AT4G14330.1	6e-156	1454.09	844.12	2064.06	1.28996	1.61719e-05	0.00149071	1.28996
comp82821	BAH and TFIIS domain-containing protein; protein with N-terminal bromo-adjacent homology (BAH) and transcription elongation factor S-II (TFS2N) domains and two C-terminal GW (glycine and tryptophan) repeats. It is nuclear and colocalizes with the processing-body component DCP1 in the cytoplasm. SOU is a component of the miRNA pathway and is involved in translational repression.	AT3G48050.2	3e-91	1290.17	523.028	2057.32	1.97581	5.39359e-11	2.97522e-08	1.97581
comp82824	WD40 domain-containing protein	AT2G47410.2	0	1148.77	674.552	1622.98	1.26665	7.13446e-05	0.00499313	1.26665
comp82858	phospholipase D (PLDbeta)	AT2G42010.1	8e-84	882.669	500.103	1265.24	1.33911	7.14525e-06	0.000759586	1.33911
comp82894				152.605	82.3071	222.903	1.43733	6.58443e-05	0.00471174	1.43733
comp82899	RING/U-box superfamily protein	AT1G80400.1	4e-18	528.309	747.312	309.307	-1.27267	1.60194e-05	0.00147859	1.27267
comp82937	CONTAINS InterPro DOMAIN/s: Ankyrin repeat-containing domain (InterPro:IPR020683), Ankyrin repeat (InterPro:IPR002110); BEST Arabidopsis thaliana protein match is: XB3 ortholog 2 in Arabidopsis thaliana (TAIR:AT5G57740.1); Has 66374 Blast hits to 25358 proteins in 1201 species: Archae - 121; Bacteria - 8133; Metazoa - 29530; Fungi - 5885; Plants - 3349; Viruses - 785; Other Eukaryotes - 18571 (so…	AT5G14230.1	8e-173	589.275	325.502	853.047	1.38996	9.76126e-06	0.000992503	1.38996
comp82959	Aldolase-type TIM barrel family protein; FUNCTIONS IN: ribulose-phosphate 3-epimerase activity, catalytic activity; INVOLVED IN: carbohydrate metabolic process, metabolic process; LOCATED IN: endomembrane system; EXPRESSED IN: 22 plant structures; EXPRESSED DURING: 13 growth stages; CONTAINS InterPro DOMAIN/s: Aldolase-type TIM barrel (InterPro:IPR013785), Ribulose-phosphate 3-epimerase (InterPro…	AT3G01850.2	8e-122	304.231	425.932	182.531	-1.22248	0.000130956	0.00816213	1.22248
comp82967	Tetratricopeptide repeat (TPR)-like superfamily protein; FUNCTIONS IN: binding; LOCATED IN: plasma membrane; EXPRESSED IN: 22 plant structures; EXPRESSED DURING: 13 growth stages; CONTAINS InterPro DOMAIN/s: Tetratricopeptide TPR-1 (InterPro:IPR001440), Tetratricopeptide-like helical (InterPro:IPR011990), Tetratricopeptide repeat-containing (InterPro:IPR013026), Tetratricopeptide repeat (InterPro…	AT4G10840.1	0	989.722	613.807	1365.64	1.15372	0.000111	0.00714726	1.15372
comp82969	ABC transporter G family member 39	AT1G66950.1	0	1001.11	591.862	1410.35	1.25272	3.36702e-05	0.0027718	1.25272
comp82979	Encodes a DCAF/DWD protein capable of interacting with DDB1 and associating with CUL4, likely as part of a nuclear ubiquitin ligase complex. DCAF1 appears to be required for plant embryogenesis and to affect several other developmental processes including leaf, shoot, and flower development.	AT4G31160.1	0	881.713	418.601	1344.82	1.68377	2.07923e-08	5.71225e-06	1.68377
comp83002	transducin family protein / WD-40 repeat family protein; CONTAINS InterPro DOMAIN/s: WD40 repeat-like-containing domain (InterPro:IPR011046), WD40 repeat 2 (InterPro:IPR019782), Cytochrome cd1-nitrite reductase-like, C-terminal haem d1 (InterPro:IPR011048), WD40-repeat-containing domain (InterPro:IPR017986), WD40 repeat (InterPro:IPR001680), WD40/YVTN repeat-like-containing domain (InterPro:IPR01…	AT1G27470.1	4e-12	52.4692	20.2353	84.7032	2.06554	3.7984e-06	0.000454097	2.06554
comp83009	encodes a cellulose synthase like protein. mutations initiate root hairs that rupture at their tip soon after initiation. is required for the synthesis of a noncellulosic wall polysaccharide.	AT3G03050.1	0	2680.56	1562.54	3798.57	1.28157	2.09642e-05	0.00184738	1.28157
comp83034	Similar to Polycomb-group gene Enhancer of zeste. Required for stable repression of AG and AP3. Putative role in cell fate determination. Involved in the control of leaf morphogenesis. mutants exhibit curled, involute leaves. AGAMOUS and APETALA3 are ectopically expressed in the mutant.	AT2G23380.1	0	789.599	417.827	1161.37	1.47485	1.05666e-06	0.000158512	1.47485
comp83070	Encodes the kinesin-like protein PAK has an Armadillo motif tail and is involved in guard cell development in Arabidopsis (from Genbank record AF159052).However, no defect in stomatal complexes has been observed in loss of function mutations. It accumulates at the preprophase band (PPB) in a cell-cycle and microtubule-dependent manner and is most highly expressed in cells where the placement of t…	AT1G12430.1	0	1058.64	544.189	1573.09	1.53142	2.46024e-07	4.81304e-05	1.53142
comp83200				22.5808	4.71026	40.4513	3.10231	7.58539e-06	0.000795512	3.10231
comp83245	chromatin remodeling 5 (CHR5); FUNCTIONS IN: chromatin binding, helicase activity, DNA binding, nucleic acid binding, ATP binding; INVOLVED IN: chromatin assembly or disassembly; LOCATED IN: chromatin, nucleus; EXPRESSED IN: 26 plant structures; EXPRESSED DURING: 15 growth stages; CONTAINS InterPro DOMAIN/s: Chromo domain (InterPro:IPR000953), SNF2-related (InterPro:IPR000330), Homeodomain-like (…	AT2G13370.1	0	1793.63	734.573	2852.68	1.95734	4.03246e-11	2.27821e-08	1.95734
comp83273	Transducin/WD40 repeat-like superfamily protein; CONTAINS InterPro DOMAIN/s: WD40 repeat 2 (InterPro:IPR019782), WD40 repeat-like-containing domain (InterPro:IPR011046), WD40-repeat-containing domain (InterPro:IPR017986), WD40/YVTN repeat-like-containing domain (InterPro:IPR015943), WD40 repeat (InterPro:IPR001680), WD40 repeat, subgroup (InterPro:IPR019781); BEST Arabidopsis thaliana protein mat…	AT3G09080.1	1e-105	512.07	306.523	717.617	1.22722	5.12839e-05	0.00384662	1.22722
comp83403				14.3266	2.52655	26.1267	3.37028	0.000102915	0.00673182	3.37028
comp83407	encodes a member of the DREB subfamily A-4 of ERF/AP2 transcription factor family. The protein contains one AP2 domain. There are 17 members in this subfamily including TINY.	AT5G11590.1	1e-28	53.272	98.1758	8.36824	-3.55237	3.13213e-07	5.83576e-05	3.55237
comp83655	SET domain protein 2 (SDG2); EXPRESSED IN: male gametophyte, cultured cell; EXPRESSED DURING: M germinated pollen stage; CONTAINS InterPro DOMAIN/s: SET domain (InterPro:IPR001214); BEST Arabidopsis thaliana protein match is: histone methyltransferases(H3-K4 specific);histone methyltransferases(H3-K36 specific) (TAIR:AT1G77300.1); Has 30201 Blast hits to 17322 proteins in 780 species: Archae - 12…	AT4G15180.1	2e-180	1594.28	667.269	2521.28	1.91782	1.64359e-10	8.34371e-08	1.91782
comp83726	GLK2, Golden2-like 2, one of a pair of partially redundant nuclear transcription factors that regulate chloroplast development in a cell-autonomous manner. GLK1, Golden2-like 1, is encoded by At2g20570. GLK1 and GLK2 regulate the expression of the photosynthetic apparatus.	AT5G44190.1	1e-40	623.073	338.045	908.101	1.42563	3.50748e-06	0.000425121	1.42563
comp83752	unknown protein; Has 25732 Blast hits to 16979 proteins in 961 species: Archae - 144; Bacteria - 1801; Metazoa - 12681; Fungi - 1868; Plants - 912; Viruses - 94; Other Eukaryotes - 8232 (source: NCBI BLink).	AT3G15550.1	2e-91	1786.27	874.826	2697.72	1.62467	4.31383e-08	1.04571e-05	1.62467
comp83782	bacterial contamination			7.70514	15.4103	0	-Inf	1.01738e-06	0.000153993	Inf
comp83804	Protein kinase superfamily protein; FUNCTIONS IN: protein serine/threonine kinase activity, protein kinase activity, kinase activity, ATP binding; INVOLVED IN: protein amino acid phosphorylation; LOCATED IN: cellular_component unknown; EXPRESSED IN: 16 plant structures; EXPRESSED DURING: 8 growth stages; CONTAINS InterPro DOMAIN/s: Protein kinase, ATP binding site (InterPro:IPR017441), Serine/thr…	AT5G65530.1	4e-116	623.438	332.43	914.446	1.45985	4.73099e-06	0.000548732	1.45985
comp83893	Binds the carboxyl-terminal domain (CTD) of the largest subunit of RNA polymerase II and functions as a scaffold for RNA processing machineries.	AT3G19840.1	1e-150	1432.27	834.394	2030.14	1.28278	2.21085e-05	0.00193604	1.28278
comp84033	glutathione S-conjugate transporting ATPase (AtMRP1) mRNA. An ABCC-type arsenite-phytochelatin transporter. The expression of this gene is upregulated by herbicide safeners such as benoxacor and fenclorim.	AT1G30400.2	0	3557.05	2011.58	5102.52	1.34288	5.26963e-06	0.000594475	1.34288
comp84126	Encodes a separase (ESP), homologous to human and mouse separase protein. Separase is a capase family protease required for the release of sister chromatid cohesion during meiosis and mitosis. Arabidopsis separase contains a predicted 2Fe2S-ferredoxin domain that is not present in the proteins of other organisms. Also contains a putative EF-hand calcium binding domain. Mutant seeds exhibited embr…	AT4G22970.1	3e-61	1940.28	829.606	3050.95	1.87876	2.01446e-10	9.86887e-08	1.87876
comp84181	NAD(P)-binding Rossmann-fold superfamily protein	AT2G47140.1	4e-80	1379.23	2052.77	705.681	-1.54049	8.29608e-05	0.00563169	1.54049
comp84254	GSL8, a member of the Glucan Synthase-Like (GSL) family believed to be involved in the synthesis of the cell wall component callose. GSL8 is required for male gametophyte development and plant growth. Has a role in entry of microspores into mitosis. Also refer to GSL10 (At3g07160).	AT2G36850.1	6e-21	24.1861	5.71605	42.6562	2.89966	4.92575e-06	0.000563853	2.89966
comp84266	xyloglucan endo-transglycosylase-like protein	AT4G14130.1	1e-24	72.3743	40.0842	104.664	1.38466	9.0465e-05	0.00609386	1.38466
comp84295				14.1549	0.695403	27.6144	5.31143	1.13019e-06	0.000167747	5.31143
comp84299	Pentatricopeptide repeat (PPR-like) superfamily protein; CONTAINS InterPro DOMAIN/s: Pentatricopeptide repeat (InterPro:IPR002885); BEST Arabidopsis thaliana protein match is: Pentatricopeptide repeat (PPR) superfamily protein (TAIR:AT3G08820.1); Has 41759 Blast hits to 14424 proteins in 280 species: Archae - 0; Bacteria - 19; Metazoa - 208; Fungi - 170; Plants - 40611; Viruses - 0; Other Eukaryo…	AT2G34400.1	6e-24	77.5169	16.8799	138.154	3.0329	4.21626e-12	3.43458e-09	3.0329
comp84426				27.4071	1.96111	52.8532	4.75225	2.59174e-10	1.2268e-07	4.75225
comp84540	CYP75B1, D501 | Cytochrome P450	AT5G07990.1	2e-101	57.3417	99.8825	14.8009	-2.75455	2.6794e-08	7.19189e-06	2.75455
comp84571	P-loop containing nucleoside triphosphate hydrolases superfamily protein; FUNCTIONS IN: microtubule motor activity, ATP binding; INVOLVED IN: microtubule-based movement; EXPRESSED IN: 12 plant structures; EXPRESSED DURING: 6 growth stages; CONTAINS InterPro DOMAIN/s: Kinesin, motor region, conserved site (InterPro:IPR019821), Kinesin, motor domain (InterPro:IPR001752); BEST Arabidopsis thaliana p…	AT2G36200.1	0	1285.17	719.252	1851.08	1.3638	4.01287e-06	0.000474875	1.3638
comp84594				59.0869	22.1218	96.0519	2.11835	2.65872e-07	5.07518e-05	2.11835
comp84631	Encodes a protein with a putative role in mRNA splicing.	AT3G52250.1	6e-20	1096.8	565.576	1628.01	1.52532	2.77562e-05	0.00235126	1.52532
comp84663	Microtubule motor kinesin PAKRP1L/Kinesin-12B. Together with PAKRP1/Kinesin-12A, serve as linkers of the plus ends of antiparallel microtubules in the phragmoplast.	AT3G23670.1	2e-85	2866.84	1395.38	4338.3	1.63647	3.82491e-08	9.53587e-06	1.63647
comp84710				11.4752	0.806702	22.1437	4.77872	2.11271e-05	0.0018594	4.77872
comp84718				52.9001	22.6236	83.1765	1.87835	7.38701e-05	0.00512381	1.87835
comp84740	Encodes magnesium chelatase involved in plastid-to-nucleus signal transduction.	AT5G13630.1	0	1187.92	740.347	1635.49	1.14345	0.000117935	0.00750411	1.14345
comp84769	BEST Arabidopsis thaliana protein match is: CW-type Zinc Finger (TAIR:AT3G62900.1); Has 35333 Blast hits to 34131 proteins in 2444 species: Archae - 798; Bacteria - 22429; Metazoa - 974; Fungi - 991; Plants - 531; Viruses - 0; Other Eukaryotes - 9610 (source: NCBI BLink).	AT1G02990.2	8e-30	573.153	303.176	843.129	1.4756	3.89444e-06	0.000463207	1.4756
comp86273				72.5269	12.2761	132.778	3.43509	6.14097e-14	7.1702e-11	3.43509
comp86462				11.8199	21.7098	1.93001	-3.49167	5.81707e-05	0.00427619	3.49167
comp87951	TSO1; DNA binding protein (tso1) mRNA, tso1-3 allele, similarity to Drosophila Enhancer of zeste; Regulates f meristem organization and cell division	AT3G22780.1	1e-59	829.77	453.655	1205.89	1.41043	3.53618e-06	0.000427244	1.41043
comp91285	MYB transcription factor involved in wounding and osmotic stress response. Member of the R2R3 factor gene family.	AT4G21440.1	6e-39	13.1293	0	26.2586	Inf	5.1529e-08	1.21546e-05	Inf
comp94360				41.2382	9.51801	72.9584	2.93834	2.41368e-08	6.55399e-06	2.93834
comp96325	Photosystem I, PsaA/PsaB protein	ATCG00350.1	4e-75	65.8327	119.743	11.9228	-3.32814	4.93282e-05	0.00374403	3.32814
comp96414				32.5445	7.80711	57.2819	2.87522	7.2169e-07	0.00011596	2.87522
comp96470	ABC transporter G family member 11	AT1G17840.1	5e-43	252.301	152.716	351.886	1.20426	0.000140228	0.00861735	1.20426
comp96490				175.794	88.9024	262.686	1.56304	3.01834e-06	0.00037032	1.56304
comp96506	Concanavalin A-like lectin protein kinase family protein; FUNCTIONS IN: kinase activity; INVOLVED IN: protein amino acid phosphorylation; LOCATED IN: endomembrane system; EXPRESSED IN: 15 plant structures; EXPRESSED DURING: 6 growth stages; CONTAINS InterPro DOMAIN/s: Legume lectin, beta chain (InterPro:IPR001220), Protein kinase, ATP binding site (InterPro:IPR017441), Serine/threonine-protein ki…	AT5G55830.1	1e-12	10.323	0.459001	20.187	5.45879	1.50687e-05	0.00140193	5.45879
comp96526				503.496	274.41	732.583	1.41666	4.80342e-06	0.000554379	1.41666
comp96583	Zim17-type zinc finger protein; LOCATED IN: chloroplast; CONTAINS InterPro DOMAIN/s: Zinc finger, Zim17-type (InterPro:IPR007853); BEST Arabidopsis thaliana protein match is: Zim17-type zinc finger protein (TAIR:AT5G27280.1); Has 375 Blast hits to 375 proteins in 159 species: Archae - 0; Bacteria - 0; Metazoa - 108; Fungi - 113; Plants - 110; Viruses - 0; Other Eukaryotes - 44 (source: NCBI BLink…	AT1G68730.1	2e-26	215.501	331.455	99.5464	-1.73537	1.17499e-07	2.54845e-05	1.73537
comp96624	unknown protein; Has 25732 Blast hits to 16979 proteins in 961 species: Archae - 144; Bacteria - 1801; Metazoa - 12681; Fungi - 1868; Plants - 912; Viruses - 94; Other Eukaryotes - 8232 (source: NCBI BLink).	AT3G15550.1	4e-70	442.251	168.634	715.868	2.0858	1.62908e-11	1.05069e-08	2.0858
comp96640				274.174	391.14	157.207	-1.31502	2.64634e-05	0.00225812	1.31502
comp96699	RING/U-box superfamily protein; FUNCTIONS IN: zinc ion binding; EXPRESSED IN: 22 plant structures; EXPRESSED DURING: 15 growth stages; CONTAINS InterPro DOMAIN/s: Zinc finger, RING-type (InterPro:IPR001841), Zinc finger, C3HC4 RING-type (InterPro:IPR018957); BEST Arabidopsis thaliana protein match is: RING/U-box superfamily protein (TAIR:AT5G24870.2); Has 30201 Blast hits to 17322 proteins in 780…	AT4G31450.1	2e-45	962.372	586.581	1338.16	1.18985	3.01462e-05	0.00252321	1.18985
comp96818				48.8103	7.30595	90.3146	3.62782	1.67816e-12	1.48817e-09	3.62782
comp96913				55.8072	3.90356	107.711	4.78623	1.76286e-17	3.52853e-14	4.78623
comp96945	transducin family protein / WD-40 repeat family protein; FUNCTIONS IN: binding, zinc ion binding; INVOLVED IN: biological_process unknown; LOCATED IN: cellular_component unknown; EXPRESSED IN: 13 plant structures; EXPRESSED DURING: 4 anthesis, F mature embryo stage, petal differentiation and expansion stage, E expanded cotyledon stage, D bilateral stage; CONTAINS InterPro DOMAIN/s: WD40 repeat 2 …	AT4G00800.1	0	572.031	323.679	820.384	1.34174	9.67274e-06	0.00098671	1.34174
comp97051				130.287	69.9101	190.663	1.44745	4.57535e-05	0.0035069	1.44745
comp97116	SART-1 family. The gene is expressed in the basal region of the developing embryo during heart stage. Phenotypic analyses of dot2 mutants suggest that this protein plays a role in root, shoot, and flower development. dot2 mutants are dwarved plants that display an aberrant spurred leaf venation pattern and fail to flower. In the roots DOT2 appears to be require for normal meristem organization an…	AT5G16780.1	3e-132	1771.12	1017.12	2525.11	1.31185	0.000134726	0.00832893	1.31185
comp97119				39.1023	8.84536	69.3593	2.9711	8.43481e-08	1.88187e-05	2.9711
comp97235	Encodes RARE1 (Required for accD RNA Editing 1), a trans-factor essential for C-to-U editing of the chloroplast accD transcript. RARE1 carries 15 PPR (pentatricopeptide repeat) motifs, an E/E+ and a DYW domain (C-terminal tripeptide).	AT5G13270.1	2e-20	26.1098	6.10106	46.1184	2.91821	8.91042e-06	0.000920691	2.91821
comp97303				958.758	524.733	1392.78	1.40832	2.70827e-06	0.000338201	1.40832
comp97315				63.1459	99.3917	26.9001	-1.88552	1.15303e-05	0.0011266	1.88552
comp97440	ERF (ethylene response factor) subfamily B-6 of ERF/AP2 transcription factor family (RAP2.11). The protein contains one AP2 domain. There are 12 members in this subfamily including RAP2.11.	AT5G19790.1	5e-17	137.044	80.483	193.604	1.26635	0.00010881	0.00704513	1.26635
comp97536				22.3918	5.49345	39.2902	2.83839	1.86381e-05	0.00168262	2.83839
comp97568	DUO pollen 3	AT2G47410.2	0	692.984	406.818	979.15	1.26715	4.53077e-05	0.00348417	1.26715
comp97701	Encodes a protein with NAD-dependent glycerol-3-phosphate (G3P) dehydrogenase which was shown to complement an Escherichia coli strain: BB20-14, auxotrophic for glycerol/G3P due to a loss-of-function mutation in the gpsA gene.	AT2G41540.3	0	90.0592	42.6971	137.421	1.68639	2.55469e-05	0.0021906	1.68639
comp97704	Encodes a xylem-specific cellulose synthase that is phosphorylated on one or more serine residues (on either S185 or one of S180 or S181).	AT5G17420.1	6e-24	271.515	84.833	458.198	2.43327	5.34364e-14	6.45439e-11	2.43327
comp97722	Protein of unknown function (DUF1635); CONTAINS InterPro DOMAIN/s: Protein of unknown function DUF1635 (InterPro:IPR012862); BEST Arabidopsis thaliana protein match is: Protein of unknown function (DUF1635) (TAIR:AT5G59760.1); Has 114 Blast hits to 114 proteins in 19 species: Archae - 0; Bacteria - 0; Metazoa - 0; Fungi - 0; Plants - 102; Viruses - 0; Other Eukaryotes - 12 (source: NCBI BLink).	AT2G28690.1	9e-13	79.7132	37.319	122.107	1.71017	5.3511e-05	0.0039923	1.71017
comp97820	Plant regulator RWP-RK family protein; FUNCTIONS IN: sequence-specific DNA binding transcription factor activity; EXPRESSED IN: 15 plant structures; EXPRESSED DURING: 7 growth stages; CONTAINS InterPro DOMAIN/s: Octicosapeptide/Phox/Bem1p (InterPro:IPR000270), Plant regulator RWP-RK (InterPro:IPR003035); BEST Arabidopsis thaliana protein match is: Plant regulator RWP-RK family protein (TAIR:AT2G4…	AT3G59580.2	7e-113	480.086	277.149	683.024	1.30127	1.92665e-05	0.00173042	1.30127
comp97860				78.2763	40.2764	116.276	1.52955	7.91091e-05	0.00541746	1.52955
comp97934				68.6677	110.855	26.4806	-2.06567	6.89856e-05	0.00486692	2.06567
comp97954	DnaJ-like protein (J20); nuclear gene	AT4G13830.2	4e-29	162.954	269.658	56.2503	-2.2612	7.62196e-07	0.000119992	2.2612
comp97962				80.909	37.9544	123.864	1.70642	2.59156e-05	0.00221408	1.70642
comp98214	member of Putative Na+/H+ antiporter family. Involved in the osmoregulation through K(+) fluxes and possibly pH modulation of an active endomembrane system in guard cells.	AT3G53720.1	4e-32	111.109	52.3015	169.916	1.6999	2.57508e-06	0.000327404	1.6999
comp98291				411.014	203.299	618.728	1.6057	5.22002e-07	8.89765e-05	1.6057
comp98420	microtubule-associated protein that is involved in both cell division and cell expansion. It likely promotes microtubule stability.	AT2G20190.1	8e-108	454.921	266.701	643.141	1.26991	6.71353e-05	0.00476518	1.26991
comp98650	A subunit of Elongator, a histone acetyl transferase complex, consisting of six subunits (ELP1?ELP6), that copurifies with the elongating RNAPII in yeast and humans. Three Arabidopsis thaliana genes, encoding homologs of the yeast Elongator subunits ELP1, ELP3 (histone acetyl transferase), and ELP4 are responsible for the narrow leaf phenotype in elongata mutants and for reduced root growth that …	AT5G13680.1	0	918.773	572.987	1264.56	1.14206	0.00016457	0.00977047	1.14206
comp98681	Kinesin-13A localized to entire Golgi stacks. Involved in trichome development.	AT3G16630.2	0	4795.63	2896.25	6695.01	1.2089	3.24093e-05	0.00268694	1.2089
comp98691	histone acetyltransferase that can use both H3 and H4 histones as substrates. No single prior lysine acetylation is sufficient to block HAC12 acetylation of the H3 or H4 peptides, suggesting that HAC12 can acetylate any of several lysines present in the peptides.	AT1G16710.1	0	2062.38	1138.79	2985.96	1.39069	5.07443e-06	0.000576165	1.39069
comp98758				13.7056	1.84981	25.5615	3.78852	7.50877e-05	0.00519797	3.78852
comp98776	TPR; Encodes one of the 36 carboxylate clamp (CC)-tetratricopeptide repeat (TPR) proteins (Prasad 2010, Pubmed ID: 20856808) with potential to interact with Hsp90/Hsp70 as co-chaperones.	AT5G12430.1	4e-141	1615.82	638.624	2593.02	2.02159	6.56599e-12	4.89348e-09	2.02159
comp98819	phosphatidyl inositol monophosphate 5 kinase	AT3G09920.3	0	812.269	493.363	1131.18	1.1971	0.000118645	0.00754249	1.1971
comp98824				15.8589	31.7179	0	-Inf	5.96982e-12	4.54589e-09	Inf
comp98838	RGPR-related; INVOLVED IN: biological_process unknown; LOCATED IN: cellular_component unknown; EXPRESSED IN: 22 plant structures; EXPRESSED DURING: 11 growth stages; BEST Arabidopsis thaliana protein match is: RGPR-related (TAIR:AT5G47480.1); Has 1807 Blast hits to 1807 proteins in 277 species: Archae - 0; Bacteria - 0; Metazoa - 736; Fungi - 347; Plants - 385; Viruses - 0; Other Eukaryotes - 339…	AT5G47490.1	2e-123	1852.72	882.608	2822.84	1.6773	1.12669e-08	3.34456e-06	1.6773
comp98976	Calossin-like protein required for polar auxin transport	AT3G02260.1	0	2301.29	890.976	3711.6	2.05858	1.02831e-11	7.20395e-09	2.05858
comp99051	ALWAYS EARLY 3 (ALY3);likely transcription repressor; FUNCTIONS IN: DNA binding; INVOLVED IN: biological_process unknown; LOCATED IN: cellular_component unknown; EXPRESSED IN: 23 plant structures; EXPRESSED DURING: 13 growth stages; CONTAINS InterPro DOMAIN/s: SANT, DNA-binding (InterPro:IPR001005), Homeodomain-like (InterPro:IPR009057), Myb, DNA-binding (InterPro:IPR014778), DIRP (InterPro:IPR01…	AT3G21430.2	1e-119	1016.72	493.483	1539.96	1.64182	4.51063e-08	1.07482e-05	1.64182
comp99073	Protein of unknown function (DUF1637)	AT5G15120.1	3e-45	1364.19	1836.34	892.038	-1.04166	3.76538e-05	0.00303204	1.04166
comp99111	Necessary for sister chromatid cohesion. Acts in synergy with ETG1.	AT1G04730.1	0	820.053	448.694	1191.41	1.40887	2.00659e-06	0.000269299	1.40887
comp99157	Protein of unknown function (DUF3133); CONTAINS InterPro DOMAIN/s: Protein of unknown function DUF3133 (InterPro:IPR021480); BEST Arabidopsis thaliana protein match is: Protein of unknown function (DUF3133) (TAIR:AT1G01440.1); Has 1545 Blast hits to 1451 proteins in 231 species: Archae - 0; Bacteria - 62; Metazoa - 476; Fungi - 316; Plants - 452; Viruses - 2; Other Eukaryotes - 237 (source: NCBI …	AT4G01090.1	3e-16	1025.81	592.468	1459.15	1.30032	1.40247e-05	0.00132414	1.30032
comp99166	unknown protein; LOCATED IN: endomembrane system; EXPRESSED IN: stem, inflorescence meristem, root, leaf; EXPRESSED DURING: LP.04 four leaves visible; Has 30201 Blast hits to 17322 proteins in 780 species: Archae - 12; Bacteria - 1396; Metazoa - 17338; Fungi - 3422; Plants - 5037; Viruses - 0; Other Eukaryotes - 2996 (source: NCBI BLink).	AT5G45310.1	5e-18	343.472	227.769	459.174	1.01147	0.00013151	0.00818542	1.01147
comp99181	Integrase-type DNA-binding superfamily protein; CONTAINS InterPro DOMAIN/s: DNA-binding, integrase-type (InterPro:IPR016177), Pathogenesis-related transcriptional factor/ERF, DNA-binding (InterPro:IPR001471); BEST Arabidopsis thaliana protein match is: AINTEGUMENTA-like 5 (TAIR:AT5G57390.1); Has 7692 Blast hits to 5276 proteins in 259 species: Archae - 0; Bacteria - 12; Metazoa - 0; Fungi - 0; Pl…	AT1G72570.1	3e-110	946.578	490.596	1402.56	1.51545	6.37536e-06	0.000695689	1.51545
comp99277	INO80 ortholog of the SWI/SNF ATPase family. Functions as a positive regulator of DNA homologous recombination (HR). In INO80 mutants, the HR frequency is reduced to 15% of that in the wild-type. Mutation in INO80 does not affect sensitivity to genotoxic agents and efficiency of T-DNA integration. INO80 was also shown to regulate a subset of the Arabidopsis transcriptome.	AT3G57300.1	7e-86	1598.58	985.137	2212.03	1.16698	4.86184e-05	0.00369688	1.16698
comp99389	Pumilio (APUM) protein containing PUF domain (eight repeats of approximately 36 amino acids each). PUF proteins regulate both mRNA stability and translation through sequence-specific binding to the 3' UTR of target mRNA transcripts.	AT4G25880.1	9e-47	1130.64	713.083	1548.2	1.11845	0.000150724	0.00911054	1.11845
comp99437	RNA-binding (RRM/RBD/RNP motifs) family protein; FUNCTIONS IN: RNA binding, nucleotide binding, nucleic acid binding; EXPRESSED IN: 22 plant structures; EXPRESSED DURING: 13 growth stages; CONTAINS InterPro DOMAIN/s: RNA recognition motif, RNP-1 (InterPro:IPR000504), Nucleotide-binding, alpha-beta plait (InterPro:IPR012677); BEST Arabidopsis thaliana protein match is: RNA-binding (RRM/RBD/RNP mot…	AT1G13190.1	1e-32	1834.56	811.709	2857.41	1.81567	1.55537e-10	7.9535e-08	1.81567
comp99654	Encodes a histone 3 lysine 9 specific methyltransferase involved in the maintenance of DNA methylation. SUVH4/KYP is a SU(VAR)3-9 homolog, a SET domain protein. Known SET domain proteins are involved in epigenetic control of gene expression. There are 10 SUVH genes in Arabidopsis and members of this subfamily of the SET proteins have an additional conserved SRA domain. In kyp mutants, there is a …	AT5G13960.1	0	843.41	482.063	1204.76	1.32145	1.24237e-05	0.00119554	1.32145
comp99656	ARM repeat superfamily protein; FUNCTIONS IN: binding; INVOLVED IN: biological_process unknown; LOCATED IN: Golgi apparatus; CONTAINS InterPro DOMAIN/s: Down-regulated-in-metastasis protein (InterPro:IPR011430), Armadillo-type fold (InterPro:IPR016024); BEST Arabidopsis thaliana protein match is: unknown protein (TAIR:AT5G36722.1); Has 687 Blast hits to 410 proteins in 187 species: Archae - 0; Ba…	AT4G30990.1	6e-129	1706.96	869.44	2544.49	1.54922	1.66964e-07	3.4606e-05	1.54922
comp99888	splicing factor PWI domain-containing protein / RNA recognition motif (RRM)-containing protein; FUNCTIONS IN: nucleotide binding, nucleic acid binding; INVOLVED IN: mRNA processing; LOCATED IN: chloroplast; EXPRESSED IN: 24 plant structures; EXPRESSED DURING: 13 growth stages; CONTAINS InterPro DOMAIN/s: RNA recognition motif, RNP-1 (InterPro:IPR000504), Nucleotide-binding, alpha-beta plait (Inte…	AT1G60200.1	5e-67	1852.84	1017.41	2688.27	1.40178	2.64093e-06	0.000331565	1.40178
comp99905				18.8393	34.4629	3.21576	-3.42181	9.8043e-05	0.00651778	3.42181
comp99909	ABC transporter G family member 11	AT1G17840.1	0	933.97	513.875	1354.06	1.39781	1.86451e-06	0.00025314	1.39781
